# Supplementary material
Source: publisher figshare collection journal article supplement (https://gsajournals.figshare.com/articles/dataset/_/12606437)
Supplement: Supplementary file 1 [file 1]

## Sheet: Genes Sig. Up in Sce.IR vs WT
Gene	Transcript (most highly expressed)	Ratio Sce.IR vs WT (log2-fold)	FDR
Abd-B	Abd-B-RD	0.439167	1.67e-19
oc	oc-RC	0.170267	2.66e-07
abd-A	abd-A-RA	0.115433	3.91e-07
mirr	mirr-RB	0.1755	8.49e-06
nub	nub-RB	0.0857333	1.61e-05
cad	cad-RB	0.176133	4.41e-05
Inx2	Inx2-RA	0.213167	0.000279544
CAH2	CAH2-RA	0.356133	0.000386584
tup	tup-RA	0.0652667	0.0015028
Sp1	Sp1-RB	0.0468333	0.00190136
Pdk	Pdk-RB	0.138767	0.00347056
lea	lea-RA	0.110067	0.00481979
CG3777	CG3777-RA	0.0891333	0.00529072
pim	pim-RA	0.5068	0.00719975
CG3262	CG3262-RF	0.391933	0.00728925
Psc	Psc-RA	0.0933333	0.00911746
CG34293	CG34293-RA	0.613267	0.00994297

## Sheet: Genes Sig. Down in Sce.IR vs WT
Gene	Transcript (most highly expressed)	Ratio WT vs Sce.IR (log2-fold)	FDR
ci	ci-RA	0.615833	5.88e-08
GstE9	GstE9-RA	1.30017	4.97e-07
CG43886	CG43886-RA	1.55567	1.67e-06
Flo1	Flo1-RA	0.598667	4.02e-06
CG4360	CG4360-RA	0.577967	4.74e-06
Gpdh1	Gpdh1-RC	0.529767	4.74e-06
CG42560	CG42560-RB	1.60097	5.72e-06
GstE8	GstE8-RB	0.999267	1.53e-05
qjt	qjt-RA	1.10047	1.7e-05
Fic	Fic-RA	0.637133	3.57e-05
CycY	CycY-RA	0.554467	3.63e-05
Rpn6	Rpn6-RB	0.555767	6.32e-05
PGRP-LC	PGRP-LC-RG	0.4502	6.97e-05
CG6418	CG6418-RB	0.614367	7.29e-05
CG7071	CG7071-RA	0.759433	7.81e-05
Muted	Muted-RA	0.759433	7.81e-05
CG31178	CG31178-RB	0.7672	8.01e-05
Mtp	Mtp-RA	0.4375	8.91e-05
bonsai	bonsai-RA	0.7123	9.18e-05
SA	sa-RA	0.416067	0.000103043
CG5642	CG5642-RA	0.460433	0.000135072
Arpc1	Arpc1-RA	0.719633	0.000136279
tum	tum-RA	0.455067	0.000180911
CG6845	CG6845-RC	0.9655	0.000196135
CG14506	CG14506-RB	0.391867	0.000208024
CG7810	CG7810-RA	0.7872	0.000223716
CG15908	CG15908-RA	0.804267	0.000405518
CG15098	CG15098-RA	0.538767	0.000435594
Srp72	Srp72-RA	0.704667	0.000437528
CG43325	CG43325-RA	0.7317	0.000457711
Vamp7	Vamp7-RA	0.5155	0.000481901
CG13775	CG13775-RA	0.5525	0.000489189
CG31975	CG31975-RB	0.753867	0.000494713
CG9706	CG9706-RB	0.666467	0.000495135
obst-H	obst-H-RA	0.775533	0.000565514
Mps1	Mps1-RA	0.538833	0.000691426
CG45099	CG45099-RA	0.4805	0.000717168
CG6015	CG6015-RA	0.4805	0.000717168
CG2736	CG2736-RA	0.4876	0.000724053
RpS21	RpS21-RA	0.711433	0.000736568
CG11550	CG11550-RA	0.5669	0.000740721
CG33080	CG33080-RB	0.469633	0.000794743
COX6AL	COX6AL-RA	0.863433	0.000891565
Ts	Ts-RB	0.7324	0.000911576
PPP1R15	PPP1R15-RA	0.530367	0.000920599
Phm	Phm-RB	0.4775	0.000939548
CG12091	CG12091-RA	0.493467	0.00114918
CG6746	CG6746-RA	0.610833	0.00115453
Eip55E	Eip55E-RA	0.578833	0.00124591
CG42571	CG42571-RB	0.628033	0.00130279
Psf2	Psf2-RC	0.5692	0.00136398
Zw10	Zw10-RB	0.4266	0.00137977
Diap1	Diap1-RD	0.411833	0.00140054
ash2	ash2-RB	0.5342	0.00157756
Chd64	Chd64-RC	0.5433	0.00160257
tgo	tgo-RB	0.413833	0.00165568
CG5039	CG5039-RA	0.8899	0.00165946
CG7949	CG7949-RA	0.923567	0.00169447
CG13077	CG13077-RB	0.592867	0.00181937
CG1309	CG1309-RA	0.416867	0.00190821
CG3353	CG3353-RA	0.668933	0.00201819
CG6813	CG6813-RC	0.538833	0.00205947
Ugt37C1	Ugt37C1-RA	0.531333	0.00211369
CG17068	CG17068-RA	0.401867	0.00215548
mRpL2	mRpL2-RA	0.627567	0.0022249
CG9948	CG9948-RB	0.670767	0.00224428
CG33785	CG33785-RA	0.513667	0.00224869
CG33786	CG33786-RA	0.513667	0.00224869
CG4069	CG4069-RA	0.409033	0.00235902
CG42559	CG42559-RA	0.7059	0.00256217
P5cr	P5cr-RA	0.599567	0.00257383
Ciao1	Ciao1-RA	0.4618	0.00292425
Sodh-2	Sodh-2-RA	0.440467	0.00294712
Dredd	Dredd-RD	0.410033	0.00295688
hpo	hpo-RA	0.431233	0.0030112
noi	noi-RA	0.449167	0.00312418
CG1882	CG1882-RA	0.496033	0.00316099
Cdk7	Cdk7-RA	0.398433	0.00325643
att-ORFA	att-ORFA-RB	0.415367	0.00330029
att-ORFB	att-ORFB-RA	0.415367	0.00330029
spag	spag-RA	0.4263	0.00346126
mRpL15	mRpL15-RA	0.419667	0.00363171
CG7988	CG7988-RA	1.12023	0.00372901
maf-S	maf-S-RA	1.1526	0.0038239
CG10809	CG10809-RA	0.513467	0.00432923
MED11	MED11-RA	0.524533	0.00446188
Nmd3	Nmd3-RA	0.394933	0.00449326
EloC	EloC-RA	0.501033	0.00454716
CG6388	CG6388-RA	0.396933	0.00484224
CG11127	CG11127-RA	0.412333	0.00528545
Hmg-2	Hmg-2-RA	0.4254	0.00543686
GstD3	GstD3-RA	0.5851	0.0054378
kin17	kin17-RA	0.441533	0.00574944
CG4386	CG4386-RA	0.661667	0.00581974
CG43326	CG43326-RA	0.904533	0.00602921
CG10286	CG10286-RA	0.478367	0.0061574
Fibp	Fibp-RE	0.474533	0.00637972
her	her-RA	0.6063	0.00688839
CG34163	CG34163-RA	0.735567	0.00750434
CG11899	CG11899-RA	0.49	0.00824431
CG34207	CG34207-RA	0.737067	0.00844473
ND-B14.5A	ND-B14.5A-RA	0.6941	0.00854645
ppan	ppan-RA	0.407667	0.0087242
CG44303	CG44303-RA	0.5084	0.00936238
CG33228	CG33228-RC	0.5902	0.00946627
Ref1	Ref1-RA	0.423733	0.00955214
KFase	KFase-RA	0.643667	0.00975845
Ugt58Fa	Ugt58Fa-RA	0.4475	0.00976587
RpS5b	RpS5b-RA	0.467433	0.00987303
mTerf5	mTerf5-RA	0.481067	0.00997533

## Sheet: Genes sig. expressed in Sce.IR
Gene	Transcript	Dam-pol2/Dam ratio	FDR
hth	hth-RC	0.3614	2.93108e-91
hth	hth-RA	0.3674	3.27264e-90
Mur2B	Mur2B-RC	0.2522	8.70043e-68
hdc	hdc-RA	0.2859	4.52189e-60
hdc	hdc-RC	0.2859	4.52189e-60
hdc	hdc-RD	0.258233	7.0338e-60
Egfr	Egfr-RA	0.665233	1.47553e-57
Shroom	Shroom-RH	0.499767	4.29852e-56
Shroom	Shroom-RD	0.499767	4.29852e-56
fz2	fz2-RB	0.719533	1.93749e-53
fz2	fz2-RF	0.719533	1.93749e-53
fz2	fz2-RC	0.7026	2.15334e-53
fz2	fz2-RG	0.671867	1.33251e-52
fz2	fz2-RD	0.2454	3.33242e-52
fz2	fz2-RE	0.2454	3.33242e-52
br	br-RA	0.4013	3.50344e-52
br	br-RL	0.4013	3.50344e-52
klar	klar-RB	0.200267	1.81193e-50
Eip75B	Eip75B-RB	0.232567	8.61256e-50
klar	klar-RA	0.1965	1.182e-49
klar	klar-RE	0.1965	1.182e-49
Eip75B	Eip75B-RF	0.2173	1.65777e-49
Eip75B	Eip75B-RE	0.227833	7.31883e-49
Eip75B	Eip75B-RG	0.318	2.46901e-48
hth	hth-RI	0.569533	4.42467e-48
Samuel	Samuel-RD	0.5206	5.38972e-47
hth	hth-RE	0.3613	1.02498e-46
hth	hth-RF	0.624533	1.30051e-46
Samuel	Samuel-RA	0.400633	6.9084e-46
br	br-RJ	0.425533	2.49533e-44
br	br-RN	0.276433	3.93295e-44
br	br-RO	0.276433	4.02813e-44
zip	zip-RE	0.730533	5.65485e-43
br	br-RC	0.445733	1.01901e-42
CG9850	CG9850-RC	0.351	1.10481e-42
CG9850	CG9850-RA	0.352767	1.12967e-42
CG9850	CG9850-RD	0.352767	1.12967e-42
CG9850	CG9850-RE	0.352767	1.12967e-42
CG9850	CG9850-RF	0.352767	1.12967e-42
cv-c	cv-c-RC	0.232367	3.79255e-42
cv-c	cv-c-RD	0.232367	3.79255e-42
zip	zip-RB	0.715767	3.91608e-42
br	br-RH	0.4432	4.51239e-42
zip	zip-RA	0.729133	6.43844e-42
zip	zip-RC	0.729133	6.43844e-42
zip	zip-RD	0.729133	6.43844e-42
zip	zip-RF	0.729133	6.43844e-42
zip	zip-RH	0.729133	6.43844e-42
zip	zip-RI	0.729133	6.43844e-42
klar	klar-RD	0.177867	7.38578e-42
trol	trol-RAF	0.243333	8.73782e-42
trol	trol-RAH	0.243333	8.73782e-42
trol	trol-RAI	0.243333	8.73782e-42
trol	trol-RAL	0.243333	8.73782e-42
trol	trol-RAM	0.243333	8.73782e-42
trol	trol-RAN	0.243333	8.73782e-42
trol	trol-RAO	0.243333	8.73782e-42
trol	trol-RAP	0.243333	8.73782e-42
trol	trol-RAQ	0.243333	8.73782e-42
trol	trol-RAR	0.243333	8.73782e-42
trol	trol-RAS	0.243333	8.73782e-42
trol	trol-RAT	0.243333	8.73782e-42
trol	trol-RAU	0.243333	8.73782e-42
trol	trol-RAV	0.243333	8.73782e-42
trol	trol-RAW	0.243333	8.73782e-42
trol	trol-RAY	0.243333	8.73782e-42
trol	trol-RAZ	0.243333	8.73782e-42
trol	trol-RBA	0.243333	8.73782e-42
trol	trol-RAX	0.243733	3.64741e-41
zip	zip-RG	0.7174	1.29283e-40
fru	fru-RK	0.297433	2.1907e-40
heph	heph-RN	0.1104	1.19151e-39
fru	fru-RI	0.199433	1.75578e-39
fru	fru-RJ	0.2056	2.05353e-39
trol	trol-RAG	0.250067	3.87703e-39
heph	heph-RB	0.109533	1.02169e-38
br	br-RP	0.422267	1.03192e-38
br	br-RB	0.422267	1.11327e-38
br	br-RQ	0.422267	1.11327e-38
heph	heph-RL	0.111933	1.12951e-38
heph	heph-RH	0.112367	1.40744e-38
heph	heph-RO	0.112367	1.40744e-38
heph	heph-RA	0.112367	1.44205e-38
heph	heph-RD	0.112367	1.44205e-38
heph	heph-RE	0.112367	1.44205e-38
heph	heph-RI	0.112367	1.44205e-38
heph	heph-RJ	0.112367	1.44205e-38
heph	heph-RK	0.112367	1.44205e-38
heph	heph-RW	0.112367	1.44205e-38
Ten-m	Ten-m-RE	0.136833	1.57262e-38
Ten-m	Ten-m-RD	0.136833	1.57262e-38
fru	fru-RB	0.121867	1.72117e-38
Ten-m	Ten-m-RB	0.135833	2.09293e-38
fru	fru-RF	0.120967	2.21393e-38
heph	heph-RM	0.112467	2.48203e-38
heph	heph-RP	0.112467	2.48203e-38
heph	heph-RV	0.112467	2.48203e-38
bi	bi-RA	0.243067	5.52463e-38
fru	fru-RC	0.1236	1.86474e-37
fru	fru-RE	0.1236	1.86474e-37
fru	fru-RN	0.1236	1.86474e-37
fru	fru-RH	0.1202	2.16077e-37
fru	fru-RG	0.1202	2.16077e-37
fru	fru-RO	0.1202	2.16077e-37
N	N-RA	0.465633	4.44547e-37
Samuel	Samuel-RE	0.5222	4.77016e-37
EcR	EcR-RD	0.2575	6.1981e-37
EcR	EcR-RE	0.2522	6.33276e-37
N	N-RB	0.471433	7.59278e-37
Ubx	Ubx-RA	0.2245	1.10883e-36
Ubx	Ubx-RC	0.2245	1.10883e-36
Ubx	Ubx-RF	0.2245	1.10883e-36
bi	bi-RF	0.230933	2.60707e-36
bi	bi-RB	0.230933	2.60707e-36
bi	bi-RG	0.2274	2.67844e-36
lola	lola-RAA	0.4461	2.95522e-36
kay	kay-RD	0.465867	3.55053e-36
heph	heph-RF	0.103	4.59818e-36
heph	heph-RG	0.102	5.86294e-36
heph	heph-RR	0.1022	5.98196e-36
heph	heph-RY	0.102433	6.08895e-36
Ubx	Ubx-RB	0.222267	6.62285e-36
Samuel	Samuel-RB	0.375833	8.46744e-36
ush	ush-RD	0.265867	1.63732e-35
ush	ush-RE	0.265867	1.63732e-35
Ubx	Ubx-RE	0.222533	2.09182e-35
Ubx	Ubx-RD	0.2232	2.2037e-35
bi	bi-RC	0.271733	2.24043e-35
bi	bi-RD	0.266533	2.33603e-35
bi	bi-RE	0.266533	2.33603e-35
br	br-RI	0.4053	2.66787e-35
AdamTS-A	AdamTS-A-RB	0.424967	3.01511e-35
br	br-RE	0.440533	3.23595e-35
br	br-RG	0.440533	3.23595e-35
EcR	EcR-RA	0.214033	3.74037e-35
sick	sick-RB	0.1265	8.15553e-35
sick	sick-RL	0.1265	8.15553e-35
Fili	Fili-RC	0.178967	2.17175e-34
bowl	bowl-RB	1.1407	2.91113e-34
bowl	bowl-RC	1.1407	2.91113e-34
bowl	bowl-RF	1.1407	2.91113e-34
bowl	bowl-RG	1.1407	2.91113e-34
Glut4EF	Glut4EF-RH	0.101767	3.26124e-34
sick	sick-RI	0.0960333	1.03361e-33
sick	sick-RN	0.0953333	1.03741e-33
sick	sick-RJ	0.0953333	1.03741e-33
bowl	bowl-RH	1.15017	1.24209e-33
bowl	bowl-RD	1.158	2.94675e-33
Glut4EF	Glut4EF-RA	0.1113	3.16678e-33
Glut4EF	Glut4EF-RG	0.1113	3.16678e-33
lola	lola-RJ	0.3296	6.47652e-33
ec	ec-RA	0.610233	6.9858e-33
lola	lola-RR	0.2533	8.43495e-33
kay	kay-RA	0.547567	9.89143e-33
kay	kay-RG	0.547567	9.89143e-33
heph	heph-RZ	0.0805333	1.06206e-32
apt	apt-RB	0.354833	1.38108e-32
apt	apt-RD	0.354833	1.38108e-32
apt	apt-RE	0.354833	1.38108e-32
mtd	mtd-RR	0.227533	1.48144e-32
CG1677	CG1677-RB	0.1184	1.48486e-32
mtd	mtd-RS	0.228633	1.58648e-32
mtd	mtd-RT	0.228633	1.58648e-32
mtd	mtd-RW	0.228633	1.58648e-32
mtd	mtd-RX	0.228633	1.58648e-32
sick	sick-RH	0.0765333	1.99178e-32
lola	lola-RO	0.293767	2.83096e-32
tkv	tkv-RA	0.381567	3.94098e-32
Shroom	Shroom-RG	0.591333	8.97489e-32
sick	sick-RM	0.139333	2.67088e-31
mtd	mtd-RB	0.2954	1.05451e-30
trh	trh-RC	0.546633	1.38752e-30
trh	trh-RF	0.546633	1.38752e-30
lola	lola-RC	0.388933	1.55631e-30
lola	lola-RW	0.270267	1.90294e-30
lola	lola-RP	0.344567	2.3429e-30
apt	apt-RC	0.375233	2.3813e-30
Eip75B	Eip75B-RC	0.2759	2.9443e-30
mtd	mtd-RP	0.310033	3.03344e-30
mtd	mtd-RN	0.310033	3.03344e-30
mtd	mtd-RJ	0.310033	3.03344e-30
mtd	mtd-RU	0.310033	3.03344e-30
mtd	mtd-RV	0.310033	3.03344e-30
mtd	mtd-RY	0.310033	3.03344e-30
Glut4EF	Glut4EF-RD	0.142	3.87301e-30
lola	lola-RY	0.265233	4.31608e-30
lola	lola-RX	0.257967	5.18216e-30
ec	ec-RB	0.316767	6.91276e-30
CG4622	CG4622-RC	0.559933	1.31099e-29
CG42666	CG42666-RH	0.4612	1.46915e-29
lola	lola-RH	0.3608	2.2566e-29
CG42666	CG42666-RB	0.526533	2.57186e-29
CG30497	CG30497-RA	0.274867	3.66205e-29
CG45093	CG45093-RA	0.274867	3.66205e-29
stumps	stumps-RC	0.367633	4.99204e-29
CG42666	CG42666-RI	0.417367	5.16905e-29
CG42666	CG42666-RJ	0.427367	6.37202e-29
CG42666	CG42666-RE	0.428233	6.98189e-29
ITP	ITP-RG	0.6186	7.21723e-29
Mur2B	Mur2B-RA	0.194	1.15558e-28
Btk29A	Btk29A-RB	0.317267	1.18696e-28
Btk29A	Btk29A-RD	0.313033	1.24031e-28
Mmp1	Mmp1-RC	0.6755	4.34451e-28
Mmp1	Mmp1-RI	0.6755	4.34451e-28
Mmp1	Mmp1-RL	0.6755	4.34451e-28
mfas	mfas-RB	1.223	4.83547e-28
mfas	mfas-RC	1.223	4.83547e-28
mfas	mfas-RP	1.223	4.83547e-28
mfas	mfas-RD	1.223	4.83547e-28
mfas	mfas-RE	1.223	4.83547e-28
mfas	mfas-RF	1.223	4.83547e-28
mfas	mfas-RG	1.223	4.83547e-28
mfas	mfas-RH	1.223	4.83547e-28
mfas	mfas-RI	1.223	4.83547e-28
mfas	mfas-RJ	1.223	4.83547e-28
mfas	mfas-RK	1.223	4.83547e-28
mfas	mfas-RM	1.223	4.83547e-28
mfas	mfas-RN	1.223	4.83547e-28
mfas	mfas-RO	1.223	4.83547e-28
mfas	mfas-RL	1.223	4.83547e-28
lola	lola-RG	0.235033	4.84724e-28
CG45186	CG45186-RAE	0.105233	5.099e-28
ds	ds-RB	0.193833	5.36448e-28
shot	shot-RG	0.193667	5.41547e-28
shot	shot-RB	0.193667	5.41547e-28
shot	shot-RI	0.193667	5.41547e-28
shot	shot-RJ	0.193667	5.41547e-28
shot	shot-RK	0.193667	5.41547e-28
shot	shot-RN	0.193667	5.41547e-28
shot	shot-RZ	0.193667	5.41547e-28
shot	shot-RAA	0.193667	5.41547e-28
ds	ds-RA	0.193033	5.53538e-28
Moe	Moe-RF	0.470733	8.69046e-28
Btk29A	Btk29A-RE	0.3062	9.36599e-28
Moe	Moe-RM	0.463767	9.93931e-28
EcR	EcR-RC	0.2757	1.41146e-27
dar1	dar1-RB	0.415433	1.66088e-27
EcR	EcR-RB	0.287833	1.7797e-27
Moe	Moe-RH	0.475067	2.61682e-27
Moe	Moe-RG	0.4679	2.99282e-27
EcR	EcR-RG	0.260833	3.32224e-27
CG32082	CG32082-RA	0.370233	3.55012e-27
CG32082	CG32082-RB	0.370233	3.55012e-27
CG32082	CG32082-RE	0.370233	3.55012e-27
CG32082	CG32082-RD	0.370233	3.55012e-27
emp	emp-RE	1.1225	5.38532e-27
ITP	ITP-RC	0.646267	6.03805e-27
T48	T48-RB	0.334767	6.38491e-27
T48	T48-RA	0.334767	6.46021e-27
pyd	pyd-RJ	0.1511	8.95633e-27
Tm1	Tm1-RK	0.359433	1.60354e-26
CG8630	CG8630-RA	1.5896	1.81765e-26
Btk29A	Btk29A-RH	0.3126	2.58527e-26
aop	aop-RE	0.559033	3.36552e-26
Tm1	Tm1-RG	0.3404	3.7959e-26
aop	aop-RB	0.5434	4.02147e-26
aop	aop-RC	0.5434	4.02147e-26
Tm1	Tm1-RJ	0.351467	4.08829e-26
Tm1	Tm1-RE	0.351467	4.08829e-26
Tm1	Tm1-RS	0.351467	4.08829e-26
Tm1	Tm1-RM	0.351467	4.08829e-26
Tm1	Tm1-RN	0.351467	4.08829e-26
Tm1	Tm1-RO	0.351467	4.08829e-26
tkv	tkv-RB	0.5099	4.67633e-26
CG8925	CG8925-RA	0.982767	7.92319e-26
CG8925	CG8925-RB	0.982767	7.92319e-26
tkv	tkv-RC	0.4789	8.35927e-26
kibra	kibra-RA	0.456633	8.62623e-26
ITP	ITP-RE	0.556167	9.741e-26
ITP	ITP-RD	0.556167	9.741e-26
shn	shn-RD	0.2405	9.77011e-26
shn	shn-RF	0.2405	9.77011e-26
kibra	kibra-RB	0.441533	1.09146e-25
Tm1	Tm1-RF	0.358667	1.10577e-25
Tm1	Tm1-RL	0.371533	1.54859e-25
blot	blot-RD	0.416433	1.61989e-25
apt	apt-RA	0.522667	2.24701e-25
Mmp1	Mmp1-RE	0.691267	2.64509e-25
Mmp1	Mmp1-RH	0.691267	2.64509e-25
Mmp1	Mmp1-RJ	0.691267	2.64509e-25
Mmp1	Mmp1-RK	0.691267	2.64509e-25
hng3	hng3-RB	0.653433	3.10727e-25
fru	fru-RD	0.501333	3.24884e-25
Mmp1	Mmp1-RG	0.692467	5.54183e-25
ush	ush-RB	0.232167	6.27909e-25
pigs	pigs-RC	0.2199	6.66268e-25
pigs	pigs-RA	0.2235	6.77928e-25
trh	trh-RD	0.7883	7.39076e-25
trh	trh-RE	0.7883	7.39076e-25
trh	trh-RA	0.7883	7.39076e-25
trh	trh-RB	0.7883	7.39076e-25
trh	trh-RG	0.7883	7.39076e-25
emp	emp-RB	1.14063	8.57147e-25
siz	siz-RB	0.269033	8.8877e-25
emp	emp-RC	1.12257	9.95572e-25
Mur2B	Mur2B-RB	0.118767	1.01069e-24
CG45186	CG45186-RT	0.128633	1.07337e-24
Dl	Dl-RB	0.509833	1.41997e-24
mrj	mrj-RD	0.5131	1.83044e-24
mrj	mrj-RH	0.5131	1.83044e-24
stumps	stumps-RE	0.5507	2.17795e-24
CG12535	CG12535-RF	0.207033	2.24579e-24
sima	sima-RA	0.158433	2.27094e-24
sima	sima-RB	0.158433	2.27094e-24
Dl	Dl-RC	0.485733	2.68299e-24
Dl	Dl-RA	0.4741	2.84315e-24
tkv	tkv-RD	0.584767	4.10193e-24
CG45186	CG45186-RAC	0.129233	5.23483e-24
Xrp1	Xrp1-RB	0.7647	5.53048e-24
ITP	ITP-RF	0.622733	6.17096e-24
Mmp1	Mmp1-RD	0.7004	6.89963e-24
fru	fru-RL	0.407633	7.01555e-24
shn	shn-RA	0.283133	7.41179e-24
RapGAP1	RapGAP1-RH	0.139367	1.08376e-23
klar	klar-RF	0.1836	1.14619e-23
RapGAP1	RapGAP1-RD	0.143	1.23736e-23
Tgi	Tgi-RB	0.613467	1.51006e-23
ogre	ogre-RC	0.533133	1.55126e-23
for	for-RI	0.356867	1.62838e-23
for	for-RA	0.356867	1.62838e-23
RapGAP1	RapGAP1-RI	0.1424	1.7419e-23
tara	tara-RA	0.284667	2.42471e-23
shn	shn-RE	0.165133	2.49759e-23
Atf3	Atf3-RA	0.286667	3.68307e-23
Atf3	Atf3-RB	0.286667	3.68307e-23
Atf3	Atf3-RC	0.286667	3.68307e-23
CG12535	CG12535-RB	0.2151	3.8177e-23
CG12535	CG12535-RC	0.2151	3.8177e-23
CG43759	CG43759-RA	0.1051	6.24306e-23
CG43759	CG43759-RB	0.1051	6.24306e-23
CG43759	CG43759-RD	0.1051	6.32222e-23
RhoGAP18B	RhoGAP18B-RB	0.417433	6.32565e-23
RhoGAP18B	RhoGAP18B-RF	0.417433	6.32565e-23
if	if-RB	0.394233	6.37311e-23
if	if-RC	0.394233	6.37311e-23
CG43759	CG43759-RC	0.105267	6.52945e-23
csw	csw-RD	0.407967	6.97547e-23
RhoGAP18B	RhoGAP18B-RH	0.395567	7.53289e-23
how	how-RB	0.341867	8.30525e-23
fng	fng-RA	0.369	8.66533e-23
fru	fru-RA	0.419367	1.04454e-22
dlp	dlp-RA	0.239833	1.0883e-22
dlp	dlp-RC	0.239833	1.0883e-22
CG8312	CG8312-RA	0.332633	1.16415e-22
how	how-RC	0.3267	1.16961e-22
CG8312	CG8312-RC	0.339167	1.21791e-22
CG8312	CG8312-RD	0.339167	1.21791e-22
ct	ct-RE	0.146133	1.48407e-22
ct	ct-RA	0.147467	1.48511e-22
ct	ct-RC	0.147467	1.48511e-22
CG42666	CG42666-RD	0.5882	1.54144e-22
shot	shot-RE	0.193333	1.628e-22
shot	shot-RA	0.193333	1.628e-22
shot	shot-RL	0.193333	1.628e-22
shot	shot-RM	0.193333	1.628e-22
shot	shot-RO	0.193333	1.628e-22
Fili	Fili-RD	0.146833	2.02551e-22
CG12535	CG12535-RE	0.223	2.49346e-22
Oatp74D	Oatp74D-RA	0.369767	2.89742e-22
Oatp74D	Oatp74D-RC	0.369767	2.89742e-22
CG4928	CG4928-RA	0.354933	2.95952e-22
Cht6	Cht6-RH	0.356367	3.12257e-22
Cht6	Cht6-RI	0.356367	3.12257e-22
Cht6	Cht6-RJ	0.356367	3.12257e-22
if	if-RD	0.385833	3.16943e-22
vfl	vfl-RD	0.4914	3.206e-22
mtd	mtd-RZ	0.169467	5.19848e-22
psq	psq-RA	0.1431	5.51915e-22
psq	psq-RC	0.1431	5.51915e-22
psq	psq-RB	0.1431	5.51915e-22
psq	psq-RM	0.140667	5.79617e-22
psq	psq-RN	0.140667	5.79617e-22
siz	siz-RD	0.326233	6.97582e-22
ex	ex-RA	0.571967	7.42639e-22
ex	ex-RB	0.571967	7.42639e-22
Cht6	Cht6-RF	0.300167	7.98277e-22
Cht6	Cht6-RG	0.300167	7.98277e-22
Cht6	Cht6-RC	0.294733	8.06359e-22
Cht6	Cht6-RK	0.294733	8.06359e-22
how	how-RE	0.2759	8.07613e-22
how	how-RA	0.269767	8.07708e-22
how	how-RD	0.269767	8.07708e-22
how	how-RF	0.269767	8.07708e-22
psq	psq-RE	0.1746	8.19891e-22
bun	bun-RG	0.1222	1.03075e-21
bun	bun-RA	0.1226	1.03176e-21
bun	bun-RF	0.120667	1.0336e-21
zfh2	zfh2-RC	0.285467	1.07011e-21
ec	ec-RC	0.732667	1.14656e-21
zfh2	zfh2-RA	0.274867	1.15854e-21
sdt	sdt-RJ	0.161033	1.198e-21
sdt	sdt-RL	0.161033	1.198e-21
zfh2	zfh2-RB	0.266933	1.2889e-21
sdt	sdt-RO	0.160833	1.29811e-21
sdt	sdt-RG	0.160833	1.29811e-21
bif	bif-RB	0.5615	1.30772e-21
bif	bif-RC	0.5615	1.30772e-21
bif	bif-RD	0.5615	1.30772e-21
bif	bif-RE	0.5615	1.30772e-21
bif	bif-RF	0.5615	1.30772e-21
sdt	sdt-RP	0.158933	1.65743e-21
sdt	sdt-RM	0.158933	1.65743e-21
CG8740	CG8740-RB	0.3917	2.79603e-21
CG8740	CG8740-RC	0.3917	2.79603e-21
CG8740	CG8740-RD	0.3917	2.79603e-21
CG8740	CG8740-RE	0.3917	2.79603e-21
Tis11	Tis11-RA	0.523333	3.08212e-21
Mmp1	Mmp1-RF	0.7266	3.81339e-21
bves	bves-RA	0.387333	3.82194e-21
psq	psq-RG	0.1713	3.99424e-21
psq	psq-RF	0.1713	3.99424e-21
Tis11	Tis11-RC	0.4571	4.18505e-21
bves	bves-RC	0.340433	4.57075e-21
bves	bves-RD	0.340433	4.57075e-21
Pka-C1	Pka-C1-RD	0.5003	4.78455e-21
Oatp74D	Oatp74D-RD	0.354633	4.81398e-21
Oatp74D	Oatp74D-RE	0.354633	4.81398e-21
Glut4EF	Glut4EF-RC	0.121433	4.96965e-21
bves	bves-RB	0.393867	5.81076e-21
kst	kst-RF	0.250367	6.46273e-21
kst	kst-RH	0.250367	6.46273e-21
CG12535	CG12535-RD	0.215033	7.12173e-21
sdt	sdt-RF	0.2016	8.84201e-21
sdt	sdt-RN	0.2016	8.84201e-21
kst	kst-RA	0.250767	9.87138e-21
kst	kst-RB	0.250767	9.87138e-21
kst	kst-RC	0.250767	9.87138e-21
CG33275	CG33275-RA	0.201567	1.07513e-20
sdt	sdt-RB	0.198233	1.12937e-20
pigs	pigs-RB	0.198333	1.15366e-20
ptr	ptr-RD	0.455033	1.25982e-20
ptr	ptr-RF	0.461467	1.27881e-20
blot	blot-RB	0.3906	1.36049e-20
bun	bun-RP	0.1265	1.46141e-20
chn	chn-RC	0.281867	1.64666e-20
chn	chn-RB	0.281867	1.64666e-20
chn	chn-RI	0.284067	1.88701e-20
csw	csw-RA	0.4077	1.94599e-20
CG17646	CG17646-RB	0.461767	2.06142e-20
CG6398	CG6398-RB	0.682967	2.13547e-20
CG6398	CG6398-RA	0.6867	2.1959e-20
chn	chn-RF	0.2722	2.21388e-20
spri	spri-RA	0.1093	2.36735e-20
spri	spri-RO	0.1093	2.36735e-20
spri	spri-RL	0.1091	2.38507e-20
spri	spri-RM	0.1091	2.38507e-20
CG9932	CG9932-RA	0.1913	3.09821e-20
CG9932	CG9932-RD	0.1913	3.09821e-20
CG9932	CG9932-RC	0.187167	3.23471e-20
CG9932	CG9932-RE	0.187167	3.23471e-20
Pka-C1	Pka-C1-RB	0.4811	4.24491e-20
Pka-C1	Pka-C1-RC	0.4811	4.24491e-20
boi	boi-RB	0.3466	4.24797e-20
boi	boi-RE	0.3466	4.24797e-20
boi	boi-RF	0.3466	4.24797e-20
boi	boi-RG	0.3466	4.24797e-20
RapGAP1	RapGAP1-RF	0.200367	5.30128e-20
emp	emp-RA	1.04973	5.55173e-20
kay	kay-RB	0.615067	5.67198e-20
Akap200	Akap200-RE	0.537533	6.65658e-20
Akap200	Akap200-RF	0.529	6.877e-20
pnt	pnt-RB	0.170767	6.88504e-20
Akap200	Akap200-RD	0.5356	7.2311e-20
rdx	rdx-RB	0.171267	8.60752e-20
Lmpt	Lmpt-RG	0.1724	8.71443e-20
Lmpt	Lmpt-RB	0.1724	8.71443e-20
Lmpt	Lmpt-RM	0.1724	8.71443e-20
chn	chn-RD	0.3126	9.29294e-20
lola	lola-RT	0.393267	9.71965e-20
chas	chas-RC	0.3345	9.90087e-20
chas	chas-RA	0.3345	9.90087e-20
CG33275	CG33275-RB	0.2463	1.28085e-19
Akap200	Akap200-RA	0.549667	1.28974e-19
mew	mew-RA	0.232433	1.45694e-19
mew	mew-RE	0.232433	1.45694e-19
wat	wat-RA	0.2713	1.51379e-19
lola	lola-RI	0.351167	1.53178e-19
fj	fj-RA	1.51633	1.59963e-19
if	if-RF	0.365933	1.61479e-19
Gp150	Gp150-RA	0.697133	1.88922e-19
Gp150	Gp150-RB	0.697133	1.88922e-19
Gp150	Gp150-RC	0.697133	1.88922e-19
RhoGAP18B	RhoGAP18B-RC	0.3497	1.92341e-19
rgn	rgn-RB	0.192833	2.27295e-19
rgn	rgn-RC	0.192833	2.27295e-19
rgn	rgn-RD	0.192833	2.27295e-19
CG32719	CG32719-RA	0.242733	2.29265e-19
rgn	rgn-RA	0.191133	2.37738e-19
RapGAP1	RapGAP1-RE	0.2654	2.60058e-19
mew	mew-RF	0.2367	2.93288e-19
mew	mew-RC	0.2367	2.93288e-19
mew	mew-RD	0.2367	2.93288e-19
CG43164	CG43164-RC	0.965467	3.38445e-19
Abd-B	Abd-B-RA	0.228433	3.43185e-19
ken	ken-RA	1.07153	3.72554e-19
Drak	Drak-RC	0.172667	4.50771e-19
Drak	Drak-RD	0.172667	4.50771e-19
ps	ps-RN	0.203867	4.63169e-19
Drak	Drak-RE	0.173767	6.30051e-19
CG45186	CG45186-RAB	0.113467	6.56591e-19
psq	psq-RK	0.157433	7.28103e-19
Abd-B	Abd-B-RC	0.207433	8.13058e-19
lola	lola-RF	0.476633	8.24789e-19
ttk	ttk-RE	0.400667	8.46712e-19
mld	mld-RF	0.172933	8.93994e-19
mld	mld-RD	0.172933	8.93994e-19
mld	mld-RA	0.172933	8.93994e-19
Btk29A	Btk29A-RC	0.393033	1.22198e-18
CycG	CycG-RF	0.488733	1.26837e-18
CG13676	CG13676-RA	0.6286	1.36376e-18
CG13676	CG13676-RB	0.6286	1.36376e-18
mtd	mtd-RG	0.3305	1.4343e-18
mtd	mtd-RK	0.3305	1.4343e-18
mtd	mtd-RO	0.3305	1.45043e-18
verm	verm-RH	1.08567	1.71307e-18
verm	verm-RI	1.08567	1.71307e-18
verm	verm-RG	1.08567	1.71307e-18
sas	sas-RC	0.337267	1.75199e-18
sas	sas-RD	0.337267	1.75199e-18
elB	elB-RC	0.386367	1.80355e-18
elB	elB-RD	0.386367	1.80355e-18
CG1632	CG1632-RA	0.363167	2.16381e-18
CG1632	CG1632-RB	0.363167	2.16381e-18
mld	mld-RC	0.185767	2.43699e-18
mld	mld-RE	0.185767	2.43699e-18
sick	sick-RF	0.113567	2.4716e-18
sick	sick-RD	0.113567	2.4716e-18
sas	sas-RB	0.332067	2.93272e-18
sas	sas-RA	0.332067	2.93272e-18
lola	lola-RK	0.510967	3.34149e-18
Btk29A	Btk29A-RA	0.378333	3.609e-18
trbl	trbl-RA	0.991067	4.44986e-18
Traf4	Traf4-RE	0.436	4.54651e-18
Swim	Swim-RB	0.495	5.22633e-18
CG31523	CG31523-RB	0.535367	5.40368e-18
dally	dally-RA	0.129333	5.57159e-18
lola	lola-RU	0.377833	6.41141e-18
Dad	Dad-RA	0.4634	6.44368e-18
Dad	Dad-RC	0.4634	6.44368e-18
dally	dally-RB	0.1271	6.76224e-18
PRAS40	PRAS40-RA	0.400533	8.75251e-18
heph	heph-RU	0.0747	1.10735e-17
Dad	Dad-RB	0.482633	1.18588e-17
CG45186	CG45186-RAH	0.251233	1.28684e-17
Su(Tpl)	Su(Tpl)-RA	0.4368	1.31737e-17
CG33275	CG33275-RD	0.190767	1.4102e-17
drl	drl-RA	0.3654	1.49094e-17
drl	drl-RB	0.3654	1.49094e-17
CG31523	CG31523-RE	0.5275	1.55456e-17
Abd-B	Abd-B-RE	0.157733	1.86078e-17
pio	pio-RB	0.438533	1.90456e-17
pio	pio-RD	0.438533	1.90456e-17
mab-21	mab-21-RA	1.25607	1.99865e-17
Picot	Picot-RA	0.472467	2.03821e-17
Picot	Picot-RD	0.472467	2.03821e-17
Diap1	Diap1-RB	0.5149	2.05188e-17
Gp150	Gp150-RE	0.647733	2.11401e-17
mew	mew-RB	0.231533	2.11634e-17
CG43164	CG43164-RA	0.959	2.19285e-17
CG43164	CG43164-RB	0.959	2.19285e-17
CG43164	CG43164-RE	0.959	2.19285e-17
CG4096	CG4096-RB	0.6691	2.28258e-17
Pgk	Pgk-RD	0.8812	2.31628e-17
Diap1	Diap1-RF	0.500433	2.43793e-17
sima	sima-RD	0.125433	2.50552e-17
l(2)08717	l(2)08717-RB	0.9227	2.63575e-17
Glut4EF	Glut4EF-RB	0.101567	3.12576e-17
peb	peb-RB	0.663567	3.30103e-17
Moe	Moe-RE	0.337533	3.68923e-17
Cam	Cam-RA	0.4206	3.70158e-17
lola	lola-RV	0.508633	4.18615e-17
Cam	Cam-RE	0.4359	4.18855e-17
CycG	CycG-RD	0.462533	4.49447e-17
Pino	Pino-RB	0.4798	4.6809e-17
vri	vri-RE	0.363533	4.85723e-17
CG42666	CG42666-RC	0.634133	5.29419e-17
CG3777	CG3777-RB	0.1366	5.79696e-17
Cam	Cam-RC	0.3313	5.87017e-17
rdx	rdx-RC	0.1644	6.2253e-17
CycG	CycG-RA	0.497067	6.53157e-17
CycG	CycG-RB	0.497067	6.53157e-17
CG42666	CG42666-RF	0.5912	6.99662e-17
CG42666	CG42666-RK	0.5912	6.99662e-17
CG31523	CG31523-RC	0.516467	7.33267e-17
CG12581	CG12581-RB	0.567267	7.98756e-17
Inx2	Inx2-RA	1.22773	8.20349e-17
CycG	CycG-RC	0.540167	8.57152e-17
Tis11	Tis11-RD	0.471233	9.15635e-17
ttk	ttk-RF	0.411833	9.28097e-17
CG45050	CG45050-RF	0.495	9.94937e-17
CG8552	CG8552-RD	0.365333	1.10739e-16
CG45050	CG45050-RC	0.533967	1.1442e-16
mfas	mfas-RQ	1.03523	1.19185e-16
CG8552	CG8552-RA	0.365333	1.20623e-16
CG4096	CG4096-RC	0.667567	1.2782e-16
Reg-5	Reg-5-RA	0.9733	1.3784e-16
Reg-5	Reg-5-RB	0.9733	1.3784e-16
heph	heph-RS	0.0760667	1.4211e-16
heph	heph-RT	0.0760667	1.4211e-16
Su(Tpl)	Su(Tpl)-RB	0.3876	1.5058e-16
Su(Tpl)	Su(Tpl)-RC	0.3876	1.5058e-16
CG34417	CG34417-RD	0.1728	1.77472e-16
CG34417	CG34417-RF	0.1728	1.77472e-16
CG34417	CG34417-RI	0.1728	1.77472e-16
CG34417	CG34417-RJ	0.1728	1.77472e-16
CG34417	CG34417-RQ	0.1728	1.77472e-16
CG34417	CG34417-RR	0.1728	1.77472e-16
CG34417	CG34417-RS	0.1728	1.77472e-16
CG34417	CG34417-RT	0.1728	1.77472e-16
CG34417	CG34417-RU	0.1728	1.77472e-16
CG34417	CG34417-RV	0.1728	1.77472e-16
Abd-B	Abd-B-RD	0.369067	1.79453e-16
Inx2	Inx2-RB	1.07763	1.82984e-16
Inx2	Inx2-RD	1.07763	1.82984e-16
CG17646	CG17646-RA	0.488467	1.88244e-16
CG3655	CG3655-RD	0.110533	1.92871e-16
CG3655	CG3655-RB	0.108967	1.94736e-16
Gs2	Gs2-RB	0.826967	1.96222e-16
Gs2	Gs2-RD	0.826967	1.96222e-16
lola	lola-RB	0.301067	2.21616e-16
CG8468	CG8468-RC	0.573767	2.52751e-16
CG8468	CG8468-RA	0.573767	2.52751e-16
CG8468	CG8468-RB	0.573767	2.52751e-16
CG33181	CG33181-RJ	0.265867	2.75757e-16
fz	fz-RA	0.0850667	2.82915e-16
fz	fz-RC	0.0850667	2.82915e-16
CG33181	CG33181-RC	0.250667	2.89807e-16
CG33181	CG33181-RE	0.250667	2.89807e-16
p130CAS	p130CAS-RD	0.295833	3.08477e-16
jim	jim-RF	0.185433	3.16636e-16
CG33181	CG33181-RI	0.256233	3.31024e-16
CG33181	CG33181-RH	0.242133	3.42853e-16
tara	tara-RB	0.3836	3.52722e-16
baz	baz-RB	0.177733	4.04024e-16
baz	baz-RA	0.177733	4.04024e-16
baz	baz-RC	0.177733	4.04024e-16
baz	baz-RD	0.177733	4.04024e-16
CG34417	CG34417-RH	0.184533	4.39796e-16
CG34417	CG34417-RL	0.184533	4.39796e-16
CG3777	CG3777-RD	0.595267	4.67399e-16
CG42666	CG42666-RA	0.6511	4.73868e-16
RpL3	RpL3-RH	1.46063	4.99752e-16
magu	magu-RA	0.654	5.5947e-16
magu	magu-RF	0.654	5.5947e-16
magu	magu-RD	0.654	5.5947e-16
peb	peb-RA	0.699367	5.73836e-16
CG33181	CG33181-RF	0.235233	6.25061e-16
CG13003	CG13003-RB	0.232467	6.40076e-16
Cad99C	Cad99C-RB	0.4554	6.87032e-16
sty	sty-RC	0.260467	6.95407e-16
Cad99C	Cad99C-RA	0.4554	6.95624e-16
Diap1	Diap1-RA	0.669033	7.04534e-16
Diap1	Diap1-RE	0.669033	7.04534e-16
ps	ps-RF	0.2178	7.2099e-16
ps	ps-RP	0.2178	7.2099e-16
ps	ps-RO	0.2178	7.2099e-16
CrebA	CrebA-RB	0.3934	7.23864e-16
CG13917	CG13917-RB	0.235333	7.73132e-16
CG42666	CG42666-RG	0.0958333	8.06431e-16
Xrp1	Xrp1-RF	0.778333	8.19122e-16
CrebA	CrebA-RA	0.423167	8.26125e-16
ps	ps-RK	0.2366	8.54087e-16
klar	klar-RH	0.143467	8.70655e-16
NFAT	NFAT-RA	0.2668	8.7101e-16
NFAT	NFAT-RG	0.2668	8.7101e-16
NFAT	NFAT-RD	0.2668	8.7101e-16
CG13917	CG13917-RA	0.229833	9.09302e-16
CG13917	CG13917-RC	0.229833	9.09302e-16
tai	tai-RD	0.110167	9.87123e-16
tai	tai-RH	0.110167	9.87123e-16
tai	tai-RG	0.106533	1.02426e-15
A2bp1	A2bp1-RJ	0.0831333	1.07549e-15
A2bp1	A2bp1-RM	0.0831333	1.07549e-15
A2bp1	A2bp1-RK	0.0837667	1.10034e-15
for	for-RH	0.3571	1.14308e-15
bowl	bowl-RA	0.951767	1.46467e-15
ovo	ovo-RB	0.4265	1.56266e-15
CG3764	CG3764-RB	0.3302	1.57663e-15
tna	tna-RD	0.330267	1.64161e-15
ovo	ovo-RE	0.4223	1.74276e-15
sda	sda-RA	0.2581	1.76572e-15
sda	sda-RB	0.2581	1.76572e-15
sda	sda-RC	0.2581	1.76572e-15
sda	sda-RD	0.2581	1.76572e-15
FER	FER-RA	0.281567	1.78572e-15
FER	FER-RB	0.281567	1.78572e-15
FER	FER-RE	0.281567	1.78572e-15
FER	FER-RF	0.281567	1.78572e-15
lola	lola-RD	0.4954	1.79071e-15
CG9990	CG9990-RB	0.469867	1.98218e-15
CG9990	CG9990-RD	0.469867	1.98218e-15
CG9990	CG9990-RG	0.469867	1.98218e-15
Tm1	Tm1-RP	0.362867	2.03799e-15
chas	chas-RD	0.3152	2.06965e-15
Xrp1	Xrp1-RG	0.640367	2.15132e-15
Egfr	Egfr-RB	0.442167	2.216e-15
Xrp1	Xrp1-RA	0.652333	2.28882e-15
Xrp1	Xrp1-RC	0.652333	2.28882e-15
Xrp1	Xrp1-RE	0.652333	2.28882e-15
sick	sick-RK	0.153233	2.37735e-15
Brf	Brf-RB	0.354533	2.42521e-15
brat	brat-RA	0.1665	2.49725e-15
tai	tai-RC	0.1153	2.75765e-15
tai	tai-RE	0.1153	2.75765e-15
A2bp1	A2bp1-RE	0.0869667	2.76908e-15
A2bp1	A2bp1-RF	0.0869667	2.76908e-15
Brf	Brf-RA	0.339767	2.79967e-15
A2bp1	A2bp1-RI	0.0869667	2.82052e-15
tna	tna-RA	0.349	2.82077e-15
tai	tai-RF	0.110967	2.84857e-15
pita	pita-RA	0.8879	3.0298e-15
18w	18w-RA	0.9419	3.03217e-15
ImpL2	ImpL2-RA	0.4415	3.19104e-15
Chd64	Chd64-RB	0.792	3.38561e-15
pyd	pyd-RK	0.189633	3.54235e-15
pyd	pyd-RL	0.189633	3.54235e-15
drd	drd-RA	0.584733	3.75731e-15
RpII215	RpII215-RA	0.760767	4.05378e-15
Pli	Pli-RA	0.2345	4.17692e-15
Smr	Smr-RE	0.111467	4.30266e-15
Smr	Smr-RD	0.110267	4.43573e-15
uif	uif-RD	0.184533	4.60333e-15
uif	uif-RF	0.184533	4.60333e-15
uif	uif-RG	0.184533	4.60333e-15
Glut4EF	Glut4EF-RF	0.0852	5.0046e-15
Sox14	Sox14-RC	0.712367	5.46744e-15
Hs6st	Hs6st-RA	0.0735	6.2929e-15
Hs6st	Hs6st-RB	0.0731	6.38821e-15
CG42237	CG42237-RB	0.653733	6.5281e-15
CG42237	CG42237-RA	0.653733	6.5281e-15
siz	siz-RA	0.374767	7.40359e-15
CG13900	CG13900-RA	0.753767	7.61048e-15
CG13900	CG13900-RC	0.753767	7.61048e-15
DOR	DOR-RE	0.3803	8.35902e-15
sty	sty-RB	0.3404	8.70951e-15
CG12581	CG12581-RA	0.6244	9.18909e-15
for	for-RK	0.575733	9.32845e-15
for	for-RE	0.543867	1.10771e-14
for	for-RC	0.543867	1.10771e-14
for	for-RJ	0.543867	1.10771e-14
for	for-RD	0.543867	1.10771e-14
for	for-RG	0.543867	1.10771e-14
heph	heph-RC	0.0708333	1.27045e-14
lute	lute-RB	0.507867	1.28172e-14
lute	lute-RC	0.507867	1.28172e-14
Vrp1	Vrp1-RB	0.3669	1.30586e-14
Vrp1	Vrp1-RA	0.3669	1.30586e-14
out	out-RB	0.613233	1.54742e-14
spg	spg-RD	0.2279	1.58409e-14
out	out-RA	0.6381	1.60311e-14
spg	spg-RF	0.2279	1.64511e-14
spg	spg-RG	0.2279	1.64511e-14
CG9990	CG9990-RF	0.4586	1.67092e-14
Shroom	Shroom-RF	0.4978	1.7272e-14
CG8552	CG8552-RB	0.344833	1.85669e-14
spg	spg-RE	0.218833	1.93628e-14
spg	spg-RH	0.218833	1.93628e-14
nahoda	nahoda-RA	0.306633	1.98317e-14
nahoda	nahoda-RB	0.306633	1.98317e-14
nahoda	nahoda-RC	0.306633	1.98317e-14
Vrp1	Vrp1-RG	0.3335	1.98533e-14
Vrp1	Vrp1-RJ	0.3335	1.98533e-14
Msr-110	Msr-110-RA	0.516867	2.03126e-14
Msr-110	Msr-110-RB	0.516867	2.03126e-14
Msr-110	Msr-110-RD	0.516867	2.03126e-14
Smr	Smr-RF	0.111167	2.0678e-14
Smr	Smr-RG	0.111167	2.0678e-14
ps	ps-RH	0.2102	2.0783e-14
Tm1	Tm1-RQ	0.304267	2.26198e-14
CG30497	CG30497-RB	0.252667	2.35539e-14
CG45093	CG45093-RB	0.252667	2.35539e-14
Tm1	Tm1-RR	0.2932	2.37636e-14
RpL3	RpL3-RA	1.455	2.6097e-14
RpL3	RpL3-RG	1.455	2.6097e-14
emc	emc-RA	0.994233	2.71016e-14
GV1	GV1-RB	0.433767	2.82308e-14
Sox14	Sox14-RA	0.712167	2.82536e-14
Hsp83	Hsp83-RA	1.07397	2.93774e-14
vn	vn-RC	0.181767	3.05075e-14
CG13003	CG13003-RC	0.213933	3.16734e-14
CG9990	CG9990-RA	0.349367	3.17662e-14
nkd	nkd-RA	0.146867	3.18749e-14
nkd	nkd-RB	0.146867	3.18749e-14
nkd	nkd-RC	0.146867	3.18749e-14
ttv	ttv-RC	0.247567	3.28111e-14
CG43164	CG43164-RD	0.921233	3.33254e-14
RhoGAP18B	RhoGAP18B-RD	0.476967	3.39743e-14
Tgi	Tgi-RA	0.8279	3.78454e-14
ptc	ptc-RA	0.4777	4.04864e-14
CG34417	CG34417-RC	0.5194	4.57988e-14
Hsp83	Hsp83-RB	1.01523	4.58925e-14
heph	heph-RQ	0.0707333	4.6741e-14
vn	vn-RA	0.181667	4.76885e-14
Pli	Pli-RB	0.229267	4.98647e-14
lola	lola-RZ	0.493333	5.41688e-14
CG43394	CG43394-RC	0.543933	5.79415e-14
Pde8	Pde8-RA	0.262267	6.00315e-14
Pde8	Pde8-RN	0.262267	6.00315e-14
DOR	DOR-RG	0.3658	6.47277e-14
mbc	mbc-RA	0.235233	6.59621e-14
mbc	mbc-RB	0.235233	6.59621e-14
brat	brat-RE	0.141033	6.70466e-14
CG9095	CG9095-RA	0.233767	6.79679e-14
CG9095	CG9095-RB	0.233767	6.79679e-14
CG9095	CG9095-RD	0.233767	6.79679e-14
CG9095	CG9095-RC	0.233767	6.79679e-14
DOR	DOR-RD	0.355633	6.9896e-14
CG14879	CG14879-RA	1.1434	7.22845e-14
CG14879	CG14879-RB	1.1434	7.22845e-14
cnc	cnc-RI	0.157333	8.08308e-14
cnc	cnc-RM	0.157333	8.08308e-14
cnc	cnc-RN	0.157333	8.08308e-14
chn	chn-RA	0.358033	8.68631e-14
chn	chn-RE	0.358033	8.68631e-14
chn	chn-RG	0.358033	8.68631e-14
chn	chn-RH	0.358033	8.68631e-14
sky	sky-RB	0.177767	8.83812e-14
sky	sky-RE	0.177767	8.83812e-14
sky	sky-RK	0.177767	8.83812e-14
sick	sick-RG	0.262433	8.92355e-14
sick	sick-RE	0.262433	8.92355e-14
Tm1	Tm1-RA	0.337767	8.93128e-14
ttk	ttk-RB	0.4591	8.94255e-14
babos	babos-RB	0.681067	9.06421e-14
cher	cher-RL	0.1904	9.20824e-14
cher	cher-RN	0.1904	9.20824e-14
CG8552	CG8552-RE	0.348	9.3447e-14
haf	haf-RB	0.105267	9.88584e-14
haf	haf-RC	0.105267	9.88584e-14
haf	haf-RD	0.105267	9.88584e-14
haf	haf-RE	0.105267	9.88584e-14
haf	haf-RF	0.105267	9.88584e-14
laccase2	laccase2-RD	0.1324	1.0439e-13
Vrp1	Vrp1-RF	0.359867	1.08453e-13
Socs36E	Socs36E-RA	0.342367	1.08716e-13
Socs36E	Socs36E-RC	0.342367	1.08716e-13
Socs36E	Socs36E-RD	0.342367	1.08716e-13
CG31523	CG31523-RF	0.5384	1.09029e-13
CG43739	CG43739-RA	0.172533	1.09437e-13
sky	sky-RD	0.172533	1.09437e-13
sky	sky-RH	0.172533	1.09437e-13
sky	sky-RG	0.172533	1.09437e-13
sky	sky-RA	0.172533	1.09437e-13
sky	sky-RJ	0.172533	1.09437e-13
sky	sky-RL	0.172533	1.09437e-13
CG1607	CG1607-RA	0.4835	1.13124e-13
CG1607	CG1607-RD	0.4835	1.13124e-13
Vha16-1	Vha16-1-RA	0.5839	1.25251e-13
lola	lola-RE	0.475	1.30769e-13
lola	lola-RA	0.545833	1.47547e-13
lola	lola-RL	0.6089	1.55449e-13
Fhos	Fhos-RH	0.1659	1.64355e-13
CG9650	CG9650-RJ	0.059	1.66829e-13
CG9650	CG9650-RG	0.0587667	1.67731e-13
p130CAS	p130CAS-RG	0.3323	1.73064e-13
wdp	wdp-RD	0.413	1.73841e-13
wdp	wdp-RB	0.413	1.73841e-13
CG9821	CG9821-RC	0.688833	1.8295e-13
cno	cno-RD	0.156667	2.00747e-13
CG6231	CG6231-RD	0.390433	2.05954e-13
Moe	Moe-RD	0.279767	2.11753e-13
mamo	mamo-RG	0.0596333	2.19777e-13
CG45186	CG45186-RW	0.0691	2.25632e-13
CG15706	CG15706-RA	0.685233	2.29126e-13
CG15706	CG15706-RD	0.685233	2.29126e-13
Act5C	Act5C-RE	0.984967	2.41568e-13
babos	babos-RA	0.678433	2.47302e-13
CG14879	CG14879-RC	1.0191	2.51605e-13
CG14879	CG14879-RD	1.0191	2.51605e-13
Nrg	Nrg-RE	0.149567	2.56549e-13
CG10936	CG10936-RA	0.190333	2.69002e-13
CG34417	CG34417-RK	0.1318	2.94193e-13
CG34417	CG34417-RM	0.1318	2.94193e-13
CG34417	CG34417-RO	0.1318	2.94193e-13
CG34417	CG34417-RP	0.1318	2.94193e-13
CG34417	CG34417-RX	0.1318	2.94193e-13
CG34417	CG34417-RY	0.1318	2.94193e-13
numb	numb-RB	0.218433	3.86549e-13
uif	uif-RE	0.166033	3.99914e-13
uif	uif-RB	0.166033	3.99914e-13
uif	uif-RC	0.166033	3.99914e-13
CG6231	CG6231-RC	0.277267	4.01183e-13
ttv	ttv-RA	0.0829	4.09205e-13
laccase2	laccase2-RE	0.120967	4.62388e-13
laccase2	laccase2-RG	0.120967	4.62388e-13
CG45050	CG45050-RG	0.4597	4.71259e-13
CG45050	CG45050-RD	0.4597	4.71259e-13
CG45050	CG45050-RB	0.4597	4.71259e-13
CG31523	CG31523-RA	0.736667	4.75357e-13
CG45050	CG45050-RE	0.4387	4.80562e-13
Vha16-1	Vha16-1-RC	0.613367	4.98732e-13
Vha16-1	Vha16-1-RD	0.613367	4.98732e-13
Vha16-1	Vha16-1-RB	0.613367	4.98732e-13
mamo	mamo-RC	0.0644667	5.09053e-13
cher	cher-RI	0.209467	5.1501e-13
cher	cher-RM	0.209467	5.1501e-13
ttv	ttv-RB	0.0796333	5.37999e-13
Moe	Moe-RI	0.2793	6.48695e-13
Moe	Moe-RJ	0.2793	6.48695e-13
Nrg	Nrg-RI	0.151333	6.49674e-13
CG15706	CG15706-RF	0.6643	6.95102e-13
stg	stg-RB	1.10383	7.02938e-13
wts	wts-RA	0.310533	7.22108e-13
CG34417	CG34417-RW	0.141467	7.30074e-13
foxo	foxo-RF	0.217133	7.394e-13
foxo	foxo-RB	0.217133	7.394e-13
foxo	foxo-RC	0.217133	7.394e-13
foxo	foxo-RH	0.217133	7.394e-13
Hsc70-4	Hsc70-4-RA	0.9604	7.45349e-13
cnc	cnc-RC	0.1651	7.47832e-13
cnc	cnc-RJ	0.1651	7.47832e-13
cnc	cnc-RK	0.1651	7.47832e-13
cnc	cnc-RO	0.1651	7.47832e-13
pyd	pyd-RO	0.147733	7.62928e-13
jim	jim-RC	0.155	8.65059e-13
magu	magu-RB	0.633233	1.06779e-12
CG32473	CG32473-RC	0.5348	1.08683e-12
Pka	Pka-R2-RD	0.164967	1.10741e-12
Pka	Pka-R2-RE	0.164967	1.10741e-12
Atg18b	Atg18b-RA	0.5348	1.18699e-12
CG17265	CG17265-RA	0.350967	1.22057e-12
ps	ps-RG	0.269067	1.22724e-12
ps	ps-RM	0.269067	1.22724e-12
A2bp1	A2bp1-RL	0.0447	1.29198e-12
Pdk	Pdk-RB	0.530967	1.3266e-12
Pdk	Pdk-RD	0.530967	1.3266e-12
CG43658	CG43658-RD	0.0655667	1.35198e-12
Atg18b	Atg18b-RB	0.5105	1.37641e-12
CG13917	CG13917-RD	0.285033	1.41902e-12
Crc	Crc-RB	1.43613	1.43012e-12
shg	shg-RA	0.6173	1.45348e-12
mamo	mamo-RD	0.0571	1.46516e-12
Tudor-SN	Tudor-SN-RA	0.6732	1.49834e-12
CG45186	CG45186-RAF	0.246567	1.5183e-12
Nrg	Nrg-RH	0.164167	1.52348e-12
Nrg	Nrg-RF	0.160133	1.52487e-12
Nrg	Nrg-RG	0.160133	1.52487e-12
Nrg	Nrg-RD	0.1612	1.53883e-12
Nrg	Nrg-RA	0.159767	1.54319e-12
CG43658	CG43658-RE	0.0958667	1.54729e-12
CG43658	CG43658-RB	0.0966	1.55489e-12
CG43658	CG43658-RG	0.0966	1.55489e-12
drongo	drongo-RI	0.3233	1.56049e-12
Nrg	Nrg-RB	0.1556	1.56181e-12
Nrg	Nrg-RC	0.1594	1.56326e-12
cher	cher-RA	0.217067	1.66559e-12
cher	cher-RG	0.217067	1.66559e-12
grn	grn-RA	0.1538	1.68414e-12
grn	grn-RB	0.1538	1.68414e-12
grn	grn-RC	0.1538	1.68414e-12
Pka	Pka-R2-RA	0.164633	1.78093e-12
drongo	drongo-RH	0.301367	1.8553e-12
drongo	drongo-RF	0.301367	1.8553e-12
Trx-2	Trx-2-RB	1.49503	1.86987e-12
AdamTS-A	AdamTS-A-RC	0.214633	1.87203e-12
KCNQ	KCNQ-RD	0.0932667	1.95636e-12
RpL10Ab	RpL10Ab-RA	1.84483	1.99713e-12
RpL10Ab	RpL10Ab-RF	1.84483	1.99713e-12
jim	jim-RG	0.1885	2.03711e-12
jim	jim-RH	0.1885	2.03711e-12
Tudor-SN	Tudor-SN-RB	0.648867	2.04689e-12
CG42327	CG42327-RE	0.267667	2.04825e-12
SNF4Agamma	SNF4Agamma-RA	0.0645667	2.15382e-12
Kr-h1	Kr-h1-RA	0.345767	2.28549e-12
Pde8	Pde8-RE	0.252967	2.3298e-12
dm	dm-RB	0.2409	2.47926e-12
CG42699	CG42699-RC	0.215933	2.5364e-12
spin	spin-RE	0.3486	2.59607e-12
spin	spin-RD	0.3486	2.59607e-12
spin	spin-RC	0.3486	2.59607e-12
spin	spin-RB	0.3486	2.59607e-12
ogre	ogre-RD	0.4271	2.75876e-12
ogre	ogre-RF	0.4271	2.75876e-12
spin	spin-RA	0.353667	2.78624e-12
ced-6	ced-6-RD	0.5264	3.25833e-12
Hsc70-4	Hsc70-4-RG	0.936833	3.29589e-12
Imp	Imp-RD	0.1907	3.42427e-12
CLIP-190	CLIP-190-RO	0.3105	3.52242e-12
GV1	GV1-RA	0.411167	3.56226e-12
Pka	Pka-R2-RB	0.156667	3.61213e-12
Inx3	Inx3-RC	0.6582	3.63356e-12
pot	pot-RA	0.543967	3.72911e-12
Tet	Tet-RA	0.0586	3.84527e-12
Tet	Tet-RE	0.0586	3.84527e-12
Tet	Tet-RB	0.0589	3.9245e-12
Tet	Tet-RF	0.0589	3.9245e-12
cv-2	cv-2-RA	0.205167	3.92777e-12
osp	osp-RC	0.0724333	3.97798e-12
osp	osp-RD	0.0724333	3.97798e-12
osp	osp-RE	0.0724333	3.97798e-12
CG32103	CG32103-RE	0.378967	4.11045e-12
cact	cact-RC	0.359033	4.11469e-12
CG32103	CG32103-RB	0.420867	4.18775e-12
jim	jim-RI	0.150033	4.3666e-12
wdp	wdp-RC	0.376367	4.42732e-12
Dcp-1	Dcp-1-RA	1.36843	4.48147e-12
mtd	mtd-RF	0.334367	4.5556e-12
mtd	mtd-RAA	0.334367	4.5556e-12
osp	osp-RF	0.0720333	4.66506e-12
numb	numb-RA	0.363633	4.80478e-12
cact	cact-RD	0.345533	4.90419e-12
Vrp1	Vrp1-RD	0.546933	4.99268e-12
Vrp1	Vrp1-RC	0.546933	4.99268e-12
Vrp1	Vrp1-RK	0.546933	4.99268e-12
vfl	vfl-RB	0.6305	5.04169e-12
vfl	vfl-RA	0.6305	5.04169e-12
vfl	vfl-RF	0.6305	5.04169e-12
nuf	nuf-RA	0.122233	5.07446e-12
nuf	nuf-RL	0.122233	5.07446e-12
mtd	mtd-RM	0.3194	5.4762e-12
Tet	Tet-RD	0.156867	5.68147e-12
Sema-5c	Sema-5c-RB	0.294567	5.75257e-12
Tet	Tet-RC	0.1583	5.80859e-12
l(3)02640	l(3)02640-RA	0.793633	5.85688e-12
A2bp1	A2bp1-RH	0.0434333	5.857e-12
numb	numb-RD	0.336967	5.89996e-12
Sema-5c	Sema-5c-RA	0.294667	5.94133e-12
bun	bun-RH	0.171167	5.95945e-12
Hsc70-4	Hsc70-4-RD	0.9402	6.19267e-12
cact	cact-RE	0.323833	6.37885e-12
cact	cact-RB	0.3368	6.40022e-12
pelo	pelo-RA	0.653067	6.58704e-12
cact	cact-RA	0.325667	6.6181e-12
CG30280	CG30280-RB	2.17	6.62645e-12
ttk	ttk-RC	0.505833	6.66945e-12
sn	sn-RG	0.2243	6.99745e-12
Fhos	Fhos-RB	0.214967	7.2499e-12
Idgf4	Idgf4-RA	1.49787	7.4537e-12
Idgf4	Idgf4-RB	1.49787	7.4537e-12
CG8034	CG8034-RA	0.2945	7.76953e-12
CG31176	CG31176-RA	0.1042	7.90118e-12
PGRP-LC	PGRP-LC-RC	0.439967	7.96125e-12
PGRP-LC	PGRP-LC-RB	0.439967	7.96125e-12
PGRP-LC	PGRP-LC-RI	0.439967	7.96125e-12
CG43394	CG43394-RD	0.594	8.165e-12
chinmo	chinmo-RD	0.0954	8.81608e-12
chinmo	chinmo-RE	0.0954	8.81608e-12
chinmo	chinmo-RG	0.0954	8.81608e-12
Pdk	Pdk-RA	0.590067	9.02492e-12
Hsc70-4	Hsc70-4-RE	0.932867	9.13812e-12
Hsc70-4	Hsc70-4-RC	0.932867	9.13812e-12
ps	ps-RJ	0.297267	9.27492e-12
ps	ps-RQ	0.297267	9.27492e-12
Vrp1	Vrp1-RI	0.467067	9.50975e-12
Pde8	Pde8-RI	0.242833	9.64947e-12
ACC	ACC-RG	0.217133	1.06169e-11
ps	ps-RB	0.2799	1.08018e-11
IP3K1	IP3K1-RA	0.695033	1.09116e-11
Pdk	Pdk-RC	0.542833	1.09407e-11
laccase2	laccase2-RA	0.139933	1.09961e-11
wgn	wgn-RA	0.459633	1.18884e-11
wgn	wgn-RB	0.459633	1.18884e-11
Clic	Clic-RC	0.5594	1.21003e-11
jar	jar-RI	0.254067	1.21072e-11
SNF4Agamma	SNF4Agamma-RB	0.0751667	1.22977e-11
C3G	C3G-RL	0.214933	1.30466e-11
C3G	C3G-RC	0.214933	1.30466e-11
C3G	C3G-RI	0.2207	1.31449e-11
Clic	Clic-RA	0.554033	1.3839e-11
stumps	stumps-RB	0.4245	1.39412e-11
Pgd	Pgd-RB	1.13853	1.41483e-11
CG16820	CG16820-RA	0.872933	1.45903e-11
chic	chic-RD	0.47	1.45963e-11
CG2765	CG2765-RF	0.714767	1.54849e-11
ps	ps-RS	0.207167	1.62833e-11
Idgf4	Idgf4-RC	1.34353	1.67236e-11
CG13891	CG13891-RA	2.47847	1.7117e-11
Pgd	Pgd-RA	1.0754	1.89254e-11
Imp	Imp-RH	0.135333	1.91464e-11
PGRP-LC	PGRP-LC-RH	0.428333	1.92714e-11
CG30089	CG30089-RA	0.1251	1.95916e-11
Gdh	Gdh-RF	0.533867	1.97123e-11
Gdh	Gdh-RA	0.533867	1.97123e-11
CG32579	CG32579-RC	1.3427	1.97237e-11
InR	InR-RB	0.0926333	1.99056e-11
ps	ps-RT	0.2948	2.16442e-11
ps	ps-RR	0.2948	2.16442e-11
Sox14	Sox14-RB	0.649933	2.33243e-11
CG3777	CG3777-RA	0.560667	2.3807e-11
CG3777	CG3777-RC	0.560667	2.3807e-11
CG3777	CG3777-RE	0.560667	2.3807e-11
Imp	Imp-RG	0.1612	2.40584e-11
PCB	PCB-RD	0.497567	2.44133e-11
PCB	PCB-RA	0.497567	2.44133e-11
PCB	PCB-RJ	0.497567	2.44133e-11
PCB	PCB-RM	0.497567	2.44133e-11
vfl	vfl-RG	0.6391	2.44431e-11
foxo	foxo-RG	0.193633	2.53433e-11
nuf	nuf-RG	0.1125	2.54612e-11
nuf	nuf-RH	0.1125	2.54612e-11
nuf	nuf-RC	0.1125	2.55037e-11
CAH1	CAH1-RA	0.674267	2.6925e-11
Asciz	Asciz-RB	1.22557	2.7801e-11
Crc	Crc-RA	1.44907	2.79527e-11
sbb	sbb-RE	0.0812	2.90817e-11
sbb	sbb-RF	0.0812	2.90817e-11
so	so-RA	0.294367	3.00228e-11
pot	pot-RC	0.518067	3.02491e-11
pot	pot-RB	0.518067	3.02491e-11
PCB	PCB-RI	0.472233	3.04347e-11
PCB	PCB-RE	0.472233	3.04347e-11
Fbxl7	Fbxl7-RA	0.347633	3.04567e-11
olf186-F	olf186-F-RB	0.2887	3.04638e-11
olf186-F	olf186-F-RF	0.2887	3.04638e-11
Inx3	Inx3-RA	0.6404	3.06707e-11
CG11275	CG11275-RA	1.11193	3.17259e-11
psq	psq-RH	0.121333	3.44862e-11
psq	psq-RD	0.121333	3.44862e-11
psq	psq-RJ	0.121333	3.44862e-11
Inx3	Inx3-RB	0.6153	3.56014e-11
CG14200	CG14200-RA	0.229333	3.92562e-11
Sip1	Sip1-RA	0.509033	3.94454e-11
trol	trol-RAK	0.137	3.98901e-11
jar	jar-RH	0.2274	3.98903e-11
jar	jar-RK	0.2274	4.02751e-11
jar	jar-RN	0.2274	4.02751e-11
mlt	mlt-RC	1.09573	4.0518e-11
jar	jar-RJ	0.229	4.13909e-11
CG34310	CG34310-RD	0.404433	4.21826e-11
cup	cup-RC	0.404433	4.21826e-11
pgant5	pgant5-RB	0.189533	4.22e-11
pgant5	pgant5-RA	0.189533	4.22e-11
jar	jar-RG	0.2275	4.4019e-11
CG9650	CG9650-RI	0.118	4.53628e-11
br	br-RM	0.269033	4.75476e-11
CG9821	CG9821-RB	0.646933	4.95905e-11
CG9821	CG9821-RD	0.646933	4.95905e-11
Imp	Imp-RF	0.160567	5.16023e-11
InR	InR-RA	0.0884667	5.36683e-11
dm	dm-RA	0.318467	5.5777e-11
ttk	ttk-RA	0.390967	5.63315e-11
CG9782	CG9782-RA	0.680167	5.7874e-11
bun	bun-RD	0.159233	5.82582e-11
Mi-2	Mi-2-RA	0.1746	5.95191e-11
Mi-2	Mi-2-RB	0.1746	5.95191e-11
Mi-2	Mi-2-RC	0.1746	5.95191e-11
Pde11	Pde11-RG	0.0774333	6.11725e-11
Act5C	Act5C-RA	1.0212	6.30521e-11
alphaTub84B	alphaTub84B-RA	1.29803	6.39382e-11
Irk1	Irk1-RE	0.365567	6.83494e-11
CG17337	CG17337-RA	1.16837	6.93828e-11
Pfrx	Pfrx-RF	0.398	7.0594e-11
qless	qless-RA	0.216433	7.25478e-11
CG15611	CG15611-RB	0.689433	7.30072e-11
CG15611	CG15611-RA	0.689433	7.30072e-11
CG5346	CG5346-RA	0.499033	7.68899e-11
Ef1alpha48D	Ef1alpha48D-RC	0.806433	7.69811e-11
sgg	sgg-RO	0.183467	7.82967e-11
l(2)08717	l(2)08717-RA	0.867433	7.92305e-11
Cam	Cam-RB	0.4251	8.12033e-11
CG14478	CG14478-RD	0.4374	8.43773e-11
Gclm	Gclm-RB	1.68537	8.86982e-11
betaTub56D	betaTub56D-RB	0.7919	8.87678e-11
Fas3	Fas3-RE	0.0715333	8.89311e-11
blot	blot-RA	0.396133	9.11271e-11
Pde8	Pde8-RK	0.2267	9.13043e-11
CG32579	CG32579-RA	1.52343	9.18513e-11
CG32579	CG32579-RB	1.52343	9.18513e-11
exp	exp-RA	0.257767	9.29907e-11
exp	exp-RB	0.257767	9.29907e-11
CG34310	CG34310-RC	0.421767	9.36267e-11
cup	cup-RB	0.421767	9.36267e-11
CG31121	CG31121-RA	0.3421	9.57715e-11
mam	mam-RA	0.0798667	9.92956e-11
CAH2	CAH2-RB	0.568567	1.00724e-10
CG4313	CG4313-RC	0.354067	1.09325e-10
CG4313	CG4313-RE	0.354067	1.09325e-10
CG4914	CG4914-RA	0.8761	1.12347e-10
Cam	Cam-RD	0.334267	1.12857e-10
fz3	fz3-RC	0.293933	1.14646e-10
hebe	hebe-RD	0.459267	1.1942e-10
Act5C	Act5C-RD	0.934333	1.19564e-10
l(2)08717	l(2)08717-RC	0.814133	1.20781e-10
ACC	ACC-RF	0.222333	1.22235e-10
shf	shf-RA	0.488333	1.25456e-10
shf	shf-RB	0.488333	1.25456e-10
shf	shf-RC	0.488333	1.25456e-10
shf	shf-RD	0.488333	1.25456e-10
GstS1	GstS1-RC	0.611067	1.31748e-10
CG18549	CG18549-RA	0.4642	1.32608e-10
emp	emp-RD	0.6719	1.3468e-10
btl	btl-RA	0.937233	1.36466e-10
CG17549	CG17549-RB	0.880133	1.44502e-10
CG17549	CG17549-RC	0.880133	1.44502e-10
CG17549	CG17549-RD	0.880133	1.44502e-10
sgg	sgg-RH	0.1506	1.50197e-10
foi	foi-RA	0.526833	1.53486e-10
foi	foi-RC	0.526833	1.53486e-10
clos	clos-RD	0.3309	1.53738e-10
sgg	sgg-RI	0.1506	1.5543e-10
sgg	sgg-RB	0.1506	1.5543e-10
sgg	sgg-RE	0.1506	1.5543e-10
CG31522	CG31522-RG	0.242867	1.56435e-10
sgg	sgg-RF	0.146867	1.60543e-10
sog	sog-RB	0.138933	1.60902e-10
sgg	sgg-RJ	0.143333	1.61479e-10
sgg	sgg-RA	0.143333	1.61479e-10
CG8180	CG8180-RC	0.464167	1.62372e-10
CG42336	CG42336-RB	0.9522	1.68855e-10
CG42336	CG42336-RF	0.9522	1.68855e-10
CG14478	CG14478-RA	0.4378	1.69899e-10
CG5854	CG5854-RA	1.2685	1.73753e-10
pio	pio-RC	0.4005	1.74608e-10
CG31522	CG31522-RF	0.236633	1.83802e-10
CG31522	CG31522-RI	0.236633	1.83802e-10
Msr-110	Msr-110-RC	0.4673	1.86443e-10
sgg	sgg-RC	0.149967	1.89219e-10
Sema-1b	Sema-1b-RB	0.3552	1.89301e-10
mirr	mirr-RB	0.289067	1.92185e-10
cno	cno-RE	0.112133	1.97438e-10
cno	cno-RG	0.112133	1.97438e-10
cno	cno-RH	0.112133	1.97438e-10
cno	cno-RI	0.112133	1.97438e-10
glec	glec-RA	0.5888	1.97451e-10
CG3776	CG3776-RB	2.26493	1.97965e-10
Toll-7	Toll-7-RA	0.609633	1.98612e-10
Fas3	Fas3-RF	0.0674333	2.04305e-10
Dp1	Dp1-RD	0.4067	2.07295e-10
Dp1	Dp1-RA	0.4067	2.07295e-10
Fas3	Fas3-RD	0.0688667	2.07876e-10
Fas3	Fas3-RA	0.0668333	2.08204e-10
Fas3	Fas3-RB	0.0668333	2.08204e-10
Fas3	Fas3-RG	0.0668333	2.08204e-10
mirr	mirr-RA	0.279067	2.08691e-10
mirr	mirr-RC	0.279067	2.08691e-10
Traf4	Traf4-RA	0.4342	2.14172e-10
CG8180	CG8180-RA	0.475833	2.16549e-10
CG8180	CG8180-RB	0.475833	2.16549e-10
Fas3	Fas3-RC	0.0721667	2.28803e-10
CG11138	CG11138-RE	0.3113	2.29993e-10
Dp1	Dp1-RB	0.389867	2.33009e-10
sima	sima-RC	0.177167	2.36513e-10
Sema-1b	Sema-1b-RA	0.3381	2.36748e-10
PGRP-LC	PGRP-LC-RG	0.457333	2.43226e-10
Pdk1	Pdk1-RA	0.374667	2.45725e-10
Pdk1	Pdk1-RC	0.424433	2.47931e-10
Eip74EF	Eip74EF-RA	0.0864667	2.49816e-10
Eip74EF	Eip74EF-RC	0.0864667	2.49816e-10
Eip74EF	Eip74EF-RE	0.0864667	2.49816e-10
cno	cno-RC	0.1091	2.49987e-10
CG13183	CG13183-RA	0.4082	2.51718e-10
Pdk1	Pdk1-RH	0.358467	2.53279e-10
Pdk1	Pdk1-RF	0.358467	2.53279e-10
klar	klar-RC	0.497533	2.66861e-10
sdk	sdk-RA	0.0730333	2.69095e-10
sdk	sdk-RB	0.0730333	2.69095e-10
sdk	sdk-RD	0.0730333	2.69095e-10
sdk	sdk-RC	0.0730333	2.69095e-10
sdk	sdk-RG	0.0730333	2.69095e-10
sdk	sdk-RH	0.0730333	2.69095e-10
sdk	sdk-RI	0.0730333	2.69095e-10
sdk	sdk-RE	0.0730333	2.69095e-10
sdk	sdk-RF	0.0730333	2.69095e-10
sgg	sgg-RR	0.156433	2.80522e-10
hang	hang-RA	0.2568	2.86975e-10
hang	hang-RC	0.2568	2.86975e-10
hang	hang-RD	0.2568	2.86975e-10
GstS1	GstS1-RD	0.555633	2.96789e-10
DAAM	DAAM-RB	0.141367	3.01434e-10
DAAM	DAAM-RG	0.141367	3.01434e-10
pyd	pyd-RI	0.1575	3.06259e-10
Act5C	Act5C-RC	0.843033	3.09624e-10
CG32137	CG32137-RA	0.172733	3.16746e-10
CG32137	CG32137-RB	0.172733	3.16746e-10
CLIP-190	CLIP-190-RA	0.227367	3.23439e-10
CLIP-190	CLIP-190-RM	0.227367	3.23439e-10
CLIP-190	CLIP-190-RS	0.227367	3.23439e-10
CLIP-190	CLIP-190-RB	0.2245	3.25874e-10
4EHP	4EHP-RD	0.0976333	3.2718e-10
rhea	rhea-RC	0.119367	3.2792e-10
CG32473	CG32473-RA	0.380967	3.30039e-10
form3	form3-RA	0.145767	3.305e-10
form3	form3-RB	0.145767	3.305e-10
Rho1	Rho1-RA	0.7842	3.47864e-10
4EHP	4EHP-RA	0.0945333	3.52572e-10
RpL3	RpL3-RD	1.8544	3.57995e-10
kdn	kdn-RB	0.3775	3.69387e-10
scramb2	scramb2-RA	1.1194	3.71292e-10
sgg	sgg-RK	0.175233	3.75709e-10
bun	bun-RE	0.134833	3.77561e-10
Imp	Imp-RM	0.147533	3.78097e-10
bun	bun-RO	0.131733	3.89948e-10
CG11170	CG11170-RB	0.665433	3.98276e-10
CG11170	CG11170-RC	0.665433	3.98276e-10
eIF-4a	eIF-4a-RA	0.695067	4.11905e-10
qless	qless-RB	0.205967	4.19434e-10
sgg	sgg-RG	0.174067	4.30705e-10
sgg	sgg-RN	0.1675	4.3956e-10
Phk-3	Phk-3-RB	1.20393	4.40308e-10
fz3	fz3-RA	0.307133	4.49204e-10
eIF-4a	eIF-4a-RC	0.695067	4.51961e-10
Imp	Imp-RJ	0.155333	4.65379e-10
Act5C	Act5C-RB	0.953533	4.81202e-10
eIF-4a	eIF-4a-RE	0.665767	4.90713e-10
CG32982	CG32982-RG	0.161333	5.00845e-10
CG32982	CG32982-RH	0.161333	5.00845e-10
CG32982	CG32982-RD	0.161333	5.00845e-10
CG32982	CG32982-RE	0.161333	5.00845e-10
CG32982	CG32982-RF	0.161333	5.00845e-10
CG32982	CG32982-RA	0.161333	5.02199e-10
Ets98B	Ets98B-RA	0.2997	5.04787e-10
PGRP-LC	PGRP-LC-RD	0.411033	5.14318e-10
Tollo	Tollo-RA	0.495667	5.34713e-10
imd	imd-RB	0.7581	5.41482e-10
Trx-2	Trx-2-RA	1.65053	5.64758e-10
Picot	Picot-RC	0.386367	5.82426e-10
serp	serp-RB	0.581367	6.05951e-10
CG5397	CG5397-RA	1.20677	6.10374e-10
vvl	vvl-RA	0.5951	6.23309e-10
vvl	vvl-RC	0.5951	6.23309e-10
vvl	vvl-RE	0.5951	6.23309e-10
vvl	vvl-RF	0.5951	6.23309e-10
CG30089	CG30089-RB	0.153033	6.29406e-10
CG30377	CG30377-RA	0.175233	6.68594e-10
CG30377	CG30377-RB	0.175233	6.68594e-10
drm	drm-RB	0.4459	6.83375e-10
4EHP	4EHP-RB	0.101967	6.84699e-10
EF2	EF2-RC	0.7654	6.85935e-10
spi	spi-RA	0.3655	7.03343e-10
spi	spi-RF	0.3655	7.03343e-10
4EHP	4EHP-RC	0.0982	7.09032e-10
Hph	Hph-RC	0.293767	7.23478e-10
Csk	Csk-RI	0.252767	7.26043e-10
mlt	mlt-RA	1.08233	7.48598e-10
CG9336	CG9336-RB	1.00317	7.68082e-10
uzip	uzip-RB	0.177033	7.72522e-10
SNF4Agamma	SNF4Agamma-RS	0.0723667	7.76388e-10
SNF4Agamma	SNF4Agamma-RF	0.0723667	7.76388e-10
mamo	mamo-RH	0.0427	7.97339e-10
Hph	Hph-RD	0.276433	8.01755e-10
Imp	Imp-RE	0.2169	8.23647e-10
Imp	Imp-RL	0.1599	8.39002e-10
uzip	uzip-RA	0.1894	8.48112e-10
whd	whd-RA	0.343733	8.50242e-10
whd	whd-RC	0.343733	8.50242e-10
crp	crp-RB	0.1625	8.55865e-10
Gs2	Gs2-RC	0.738667	8.6098e-10
CG15317	CG15317-RA	1.94903	8.70854e-10
vvl	vvl-RD	0.547833	8.98276e-10
CG31743	CG31743-RA	0.4926	8.99673e-10
CG34313	CG34313-RA	0.4926	8.99673e-10
EF2	EF2-RA	0.769733	9.42981e-10
CG4928	CG4928-RB	0.279867	9.5354e-10
dpp	dpp-RB	0.375367	9.83616e-10
Gclm	Gclm-RA	1.6366	9.88215e-10
EF2	EF2-RD	0.7457	1.01172e-09
Pde11	Pde11-RE	0.0996333	1.01641e-09
Gs2	Gs2-RA	0.711633	1.03905e-09
Gs2	Gs2-RE	0.711633	1.03905e-09
Gs2	Gs2-RF	0.711633	1.03905e-09
Syp	Syp-RB	0.141733	1.05399e-09
CG4928	CG4928-RC	0.324033	1.07825e-09
cno	cno-RJ	0.100033	1.07869e-09
Diap1	Diap1-RC	0.758767	1.09209e-09
CG31728	CG31728-RC	0.5102	1.09855e-09
Ptr	Ptr-RC	0.2871	1.10315e-09
CG8654	CG8654-RA	0.747233	1.10579e-09
cwo	cwo-RA	0.348367	1.12947e-09
cwo	cwo-RB	0.348367	1.12947e-09
cwo	cwo-RC	0.348367	1.12947e-09
foi	foi-RD	0.550033	1.12966e-09
mthl1	mthl1-RA	0.545	1.1518e-09
mlt	mlt-RB	1.0181	1.17139e-09
bond	bond-RB	0.478833	1.1969e-09
Atg5	Atg5-RA	0.387667	1.21311e-09
fabp	fabp-RC	0.554433	1.21508e-09
sea	sea-RD	0.554433	1.21508e-09
Drat	Drat-RA	0.6048	1.22441e-09
sbb	sbb-RG	0.0625333	1.22639e-09
Spec2	Spec2-RA	0.475133	1.25238e-09
mthl1	mthl1-RB	0.509833	1.29441e-09
CLIP-190	CLIP-190-RP	0.233567	1.3125e-09
CLIP-190	CLIP-190-RR	0.233567	1.3125e-09
Myo61F	Myo61F-RC	0.398367	1.31365e-09
CG12075	CG12075-RC	0.132067	1.31691e-09
ND-15	ND-15-RF	0.125333	1.32133e-09
ND-15	ND-15-RG	0.125333	1.32133e-09
ND-15	ND-15-RH	0.125333	1.32133e-09
SNF4Agamma	SNF4Agamma-RR	0.0714667	1.33757e-09
vir-1	vir-1-RB	0.186267	1.3526e-09
vir-1	vir-1-RG	0.186267	1.3526e-09
mamo	mamo-RI	0.0416	1.443e-09
CG11791	CG11791-RB	0.723333	1.44787e-09
CG11791	CG11791-RD	0.723333	1.44787e-09
CG43394	CG43394-RB	0.479733	1.45257e-09
sdt	sdt-RE	0.163433	1.46365e-09
CG17672	CG17672-RA	0.534567	1.48911e-09
CG43897	CG43897-RC	0.168467	1.50543e-09
CG43897	CG43897-RG	0.168467	1.50543e-09
Ptr	Ptr-RB	0.283733	1.50788e-09
CG43897	CG43897-RJ	0.152533	1.52267e-09
CG43897	CG43897-RK	0.152533	1.52267e-09
CG43897	CG43897-RL	0.152533	1.52267e-09
CG43897	CG43897-RM	0.152533	1.52267e-09
CG43897	CG43897-RP	0.152533	1.52267e-09
Adf1	Adf1-RA	0.588933	1.58527e-09
Adf1	Adf1-RE	0.588933	1.58527e-09
Desat1	Desat1-RA	0.466933	1.59969e-09
sgg	sgg-RQ	0.168867	1.60615e-09
Adf1	Adf1-RB	0.588933	1.6099e-09
Adf1	Adf1-RC	0.588933	1.6099e-09
Pde11	Pde11-RC	0.0957667	1.62496e-09
CG44286	CG44286-RD	1.04307	1.68963e-09
CG8788	CG8788-RA	1.04307	1.68963e-09
CG6231	CG6231-RE	0.345667	1.73678e-09
CG45186	CG45186-RAD	0.0813667	1.80622e-09
CG14830	CG14830-RA	0.300167	1.82827e-09
CG14830	CG14830-RB	0.300167	1.82827e-09
CG14830	CG14830-RC	0.300167	1.82827e-09
SNF4Agamma	SNF4Agamma-RN	0.0964333	1.83369e-09
bru-2	bru-2-RE	0.0671	1.83445e-09
bru-2	bru-2-RD	0.0671	1.83445e-09
bru-2	bru-2-RG	0.0671	1.83445e-09
SNF4Agamma	SNF4Agamma-RM	0.0966333	1.87416e-09
SNF4Agamma	SNF4Agamma-RO	0.0966333	1.92525e-09
CG9336	CG9336-RA	1.109	1.95883e-09
His3.3B	His3.3B-RC	1.08553	1.97071e-09
sdt	sdt-RI	0.1686	1.97412e-09
Npc2b	Npc2b-RB	0.957967	1.97471e-09
crp	crp-RA	0.166533	2.02521e-09
Inx2	Inx2-RC	1.48797	2.06875e-09
fru	fru-RM	0.252933	2.22343e-09
sano	sano-RB	0.0648333	2.27354e-09
sano	sano-RA	0.0648333	2.27354e-09
sano	sano-RE	0.0648333	2.27354e-09
serp	serp-RC	0.591233	2.28864e-09
pio	pio-RE	0.384	2.36934e-09
dpp	dpp-RC	0.4108	2.43555e-09
hoip	hoip-RB	2.1507	2.44681e-09
grh	grh-RP	0.183	2.44831e-09
sog	sog-RA	0.159567	2.49289e-09
CG11138	CG11138-RD	0.357933	2.52056e-09
lola	lola-RQ	0.521167	2.53155e-09
Pdcd4	Pdcd4-RA	0.4052	2.5327e-09
CG43897	CG43897-RE	0.241333	2.53552e-09
CG43897	CG43897-RA	0.241333	2.53552e-09
CG43897	CG43897-RN	0.241333	2.53552e-09
E(spl)mbeta-HLH	E(spl)mbeta-HLH-RA	1.64103	2.59805e-09
fbl	fbl-RB	0.4778	2.63736e-09
CG43897	CG43897-RB	0.207767	2.6446e-09
CG43897	CG43897-RF	0.207767	2.6446e-09
CG43897	CG43897-RH	0.207767	2.6446e-09
sog	sog-RE	0.150667	2.83558e-09
CG42389	CG42389-RE	0.0562333	2.87119e-09
Cht7	Cht7-RA	0.349233	2.89529e-09
chinmo	chinmo-RA	0.118067	2.98303e-09
CG31523	CG31523-RG	0.655767	2.98906e-09
spi	spi-RG	0.405567	3.04248e-09
Tina-1	Tina-1-RB	1.43937	3.21345e-09
CG11825	CG11825-RC	1.1759	3.23229e-09
CG6424	CG6424-RA	0.232233	3.30669e-09
CG3776	CG3776-RA	2.2316	3.36638e-09
CG3776	CG3776-RC	2.2316	3.36638e-09
Syp	Syp-RN	0.154633	3.37815e-09
Syp	Syp-RR	0.154633	3.37815e-09
CG9815	CG9815-RD	0.282433	3.42281e-09
wdp	wdp-RA	0.312667	3.45351e-09
sea	sea-RA	0.798967	3.50381e-09
sea	sea-RE	0.798967	3.50381e-09
vir-1	vir-1-RA	0.183	3.50554e-09
Pdcd4	Pdcd4-RB	0.3778	3.52676e-09
Pdcd4	Pdcd4-RC	0.3778	3.52676e-09
Pdcd4	Pdcd4-RD	0.3778	3.52676e-09
RpS20	RpS20-RA	1.6467	3.69128e-09
CG11138	CG11138-RC	0.313033	3.73791e-09
CG5397	CG5397-RB	0.8846	3.75403e-09
E(spl)m3-HLH	E(spl)m3-HLH-RA	1.33467	3.76739e-09
px	px-RE	0.0575667	3.80066e-09
CG9372	CG9372-RA	1.13837	3.8308e-09
Neos	Neos-RA	1.29513	3.85805e-09
CG8654	CG8654-RC	0.541433	3.8948e-09
CG6051	CG6051-RB	0.115567	3.94783e-09
Pcd	Pcd-RA	1.71903	4.05825e-09
CG9837	CG9837-RD	0.598767	4.08227e-09
hoip	hoip-RA	2.1507	4.11027e-09
ATPsynC	ATPsynC-RC	1.14153	4.12214e-09
ATPsynC	ATPsynC-RE	1.14153	4.12214e-09
CG10527	CG10527-RA	0.9742	4.22726e-09
px	px-RA	0.0588333	4.2312e-09
PGRP-LC	PGRP-LC-RA	0.4934	4.35531e-09
Pdi	Pdi-RE	0.5705	4.38585e-09
ATPsynC	ATPsynC-RA	1.11727	4.4395e-09
Bacc	Bacc-RD	0.529567	4.56801e-09
sdt	sdt-RH	0.169733	4.64198e-09
bun	bun-RB	0.191267	4.69073e-09
CG32676	CG32676-RB	0.1164	4.7482e-09
ZnT77C	ZnT77C-RA	0.283033	4.76651e-09
Bka	Bka-RA	1.8005	4.91692e-09
ttk	ttk-RD	0.4176	5.07184e-09
chinmo	chinmo-RF	0.114533	5.1921e-09
CG3552	CG3552-RD	0.803033	5.31839e-09
Sin3A	Sin3A-RC	0.225233	5.37661e-09
Sin3A	Sin3A-RA	0.225233	5.37661e-09
Sin3A	Sin3A-RD	0.225233	5.37661e-09
Sin3A	Sin3A-RB	0.225233	5.37661e-09
Sin3A	Sin3A-RF	0.225233	5.37661e-09
Sin3A	Sin3A-RH	0.225233	5.37661e-09
Sin3A	Sin3A-RI	0.225233	5.37661e-09
Sin3A	Sin3A-RJ	0.225233	5.37661e-09
CG10863	CG10863-RA	1.24773	5.38374e-09
Pax	Pax-RC	0.181633	5.40492e-09
SP1173	SP1173-RA	0.251733	5.58467e-09
CG32280	CG32280-RA	0.759833	5.69509e-09
CG32280	CG32280-RB	0.759833	5.69509e-09
CG32280	CG32280-RD	0.759833	5.69509e-09
ems	ems-RA	0.953433	5.849e-09
CG32103	CG32103-RC	0.613733	5.9102e-09
CG42238	CG42238-RC	0.0563	6.03715e-09
Ef1alpha48D	Ef1alpha48D-RA	0.919067	6.11849e-09
TFAM	TFAM-RB	1.25403	6.23124e-09
CG42238	CG42238-RA	0.0564	6.27594e-09
laccase2	laccase2-RF	0.102433	6.36408e-09
Spn55B	Spn55B-RA	1.076	6.36874e-09
CG42674	CG42674-RC	0.0860333	6.42585e-09
CG42674	CG42674-RD	0.0860333	6.42585e-09
CG42674	CG42674-RE	0.0860333	6.42585e-09
CG42674	CG42674-RA	0.0860333	6.42585e-09
CG42674	CG42674-RB	0.0860333	6.42585e-09
CG42674	CG42674-RF	0.0860333	6.42585e-09
jim	jim-RE	0.1486	6.45431e-09
SP1173	SP1173-RC	0.245	6.47343e-09
SP1173	SP1173-RD	0.245	6.47343e-09
DnaJ-1	DnaJ-1-RB	1.0765	6.76779e-09
DnaJ-1	DnaJ-1-RA	1.0765	6.76779e-09
CG9107	CG9107-RA	1.19097	6.89719e-09
Reck	Reck-RA	0.319067	6.92891e-09
Reck	Reck-RB	0.319067	6.92891e-09
CG9815	CG9815-RC	0.273267	6.98267e-09
CG8654	CG8654-RD	0.536567	6.99767e-09
CG17549	CG17549-RA	0.822	7.22701e-09
CG17549	CG17549-RE	0.822	7.22701e-09
Pfrx	Pfrx-RA	0.351933	7.3043e-09
Pfrx	Pfrx-RI	0.351933	7.3043e-09
Pfrx	Pfrx-RJ	0.351933	7.3043e-09
CG30159	CG30159-RA	1.3076	7.36159e-09
CG30159	CG30159-RC	1.3076	7.36159e-09
CG3609	CG3609-RA	0.977567	7.44361e-09
RpL18A	RpL18A-RA	1.59717	7.47782e-09
arr	arr-RA	0.1112	7.55865e-09
trol	trol-RAE	0.143933	7.56228e-09
kdn	kdn-RA	0.4123	7.67793e-09
CG10211	CG10211-RA	0.200767	7.76615e-09
CG42684	CG42684-RC	0.1775	7.93324e-09
CG42684	CG42684-RE	0.1775	7.93324e-09
CG42684	CG42684-RG	0.1775	7.93324e-09
CG42684	CG42684-RH	0.1775	7.93324e-09
Hmgcr	Hmgcr-RA	0.174667	7.94749e-09
CG1607	CG1607-RB	0.366267	8.10504e-09
CG1607	CG1607-RC	0.366267	8.10504e-09
ome	ome-RE	0.0621667	8.10752e-09
CG10211	CG10211-RB	0.198867	8.12671e-09
CG2991	CG2991-RB	0.259367	8.23629e-09
CG2991	CG2991-RA	0.259367	8.23629e-09
sn	sn-RE	0.2415	8.35902e-09
sn	sn-RA	0.234	8.7298e-09
sn	sn-RB	0.234	8.7298e-09
cnc	cnc-RL	0.1407	8.77244e-09
ImpL2	ImpL2-RD	0.7562	9.09315e-09
bou	bou-RA	2.16507	9.14441e-09
His3.3B	His3.3B-RB	1.19647	9.18265e-09
CG8188	CG8188-RD	0.791633	9.18615e-09
Pino	Pino-RA	0.790367	9.28293e-09
Pino	Pino-RC	0.790367	9.28293e-09
CG3829	CG3829-RA	0.773033	9.67084e-09
Mob2	Mob2-RC	0.1074	9.69257e-09
bru-2	bru-2-RK	0.0727333	9.89035e-09
bru-2	bru-2-RA	0.0732667	1.00264e-08
bru-2	bru-2-RF	0.0732667	1.00264e-08
bru-2	bru-2-RL	0.0732667	1.00264e-08
bru-2	bru-2-RM	0.0732667	1.00264e-08
Zip99C	Zip99C-RF	0.496333	1.01777e-08
Zip99C	Zip99C-RI	0.496333	1.01777e-08
Zip99C	Zip99C-RJ	0.496333	1.01777e-08
Ef1alpha48D	Ef1alpha48D-RE	0.7157	1.04376e-08
Tsf1	Tsf1-RC	0.850867	1.07324e-08
Treh	Treh-RE	0.202433	1.08839e-08
Dat	Dat-RA	0.199267	1.11106e-08
kay	kay-RF	0.667733	1.11674e-08
chinmo	chinmo-RH	0.0864667	1.12966e-08
Dp1	Dp1-RF	0.348333	1.15201e-08
awd	awd-RE	1.67917	1.16684e-08
CG10249	CG10249-RG	0.1552	1.17959e-08
CG17834	CG17834-RF	0.5035	1.19767e-08
Tina-1	Tina-1-RA	1.20867	1.24573e-08
mod(mdg4)	mod(mdg4)-RP	0.1608	1.25617e-08
CG9801	CG9801-RA	0.233033	1.27764e-08
CG9801	CG9801-RC	0.233033	1.27764e-08
Ptr	Ptr-RA	0.2675	1.30289e-08
stg	stg-RA	0.767533	1.34169e-08
Ef1alpha48D	Ef1alpha48D-RD	1.28887	1.39185e-08
His3.3B	His3.3B-RA	0.7608	1.40609e-08
csw	csw-RB	0.260433	1.42133e-08
shn	shn-RB	0.154633	1.45123e-08
CG5885	CG5885-RA	1.587	1.45235e-08
ckn	ckn-RB	0.259933	1.45397e-08
awd	awd-RD	1.48263	1.46259e-08
awd	awd-RC	1.57187	1.47195e-08
sbb	sbb-RD	0.0615333	1.49352e-08
CG42662	CG42662-RD	1.9441	1.49656e-08
sbb	sbb-RJ	0.0616	1.52268e-08
LamC	LamC-RA	0.513033	1.5842e-08
LamC	LamC-RB	0.513033	1.5842e-08
Vha26	Vha26-RC	0.5905	1.60832e-08
mod(mdg4)	mod(mdg4)-RJ	0.156333	1.61165e-08
loco	loco-RD	0.169867	1.61904e-08
rhea	rhea-RD	0.117633	1.70045e-08
Trxr-1	Trxr-1-RA	0.540733	1.76682e-08
Fhos	Fhos-RA	0.1471	1.77574e-08
Fhos	Fhos-RD	0.1471	1.77574e-08
Fhos	Fhos-RE	0.1471	1.77574e-08
Fhos	Fhos-RF	0.1471	1.77574e-08
Fhos	Fhos-RG	0.1471	1.77574e-08
Ptpmeg	Ptpmeg-RH	0.2312	1.78461e-08
Ptpmeg	Ptpmeg-RK	0.2312	1.78461e-08
ckn	ckn-RC	0.223767	1.819e-08
ckn	ckn-RD	0.223767	1.819e-08
CG11537	CG11537-RC	0.1947	1.84626e-08
klar	klar-RG	0.261433	1.89114e-08
ckn	ckn-RE	0.220867	1.89317e-08
simj	simj-RB	0.139733	1.94646e-08
simj	simj-RA	0.139733	1.94646e-08
simj	simj-RC	0.139733	1.94646e-08
simj	simj-RD	0.139733	1.94646e-08
CG12065	CG12065-RA	0.236933	1.97445e-08
CG12065	CG12065-RB	0.236933	1.97445e-08
CG12065	CG12065-RC	0.236933	1.97445e-08
CG12065	CG12065-RD	0.236933	1.97445e-08
CG12065	CG12065-RE	0.236933	1.97445e-08
CG12065	CG12065-RF	0.236933	1.97445e-08
cnc	cnc-RP	0.378267	1.9883e-08
CG9674	CG9674-RD	0.238967	1.98893e-08
CG9801	CG9801-RB	0.2748	2.00774e-08
Amun	Amun-RK	0.615433	2.03213e-08
CG42662	CG42662-RA	1.64583	2.04066e-08
sni	sni-RA	1.24453	2.0613e-08
Rho1	Rho1-RB	0.667033	2.09445e-08
Rho1	Rho1-RC	0.667033	2.09445e-08
Rho1	Rho1-RF	0.667033	2.09445e-08
CG5001	CG5001-RB	0.299633	2.09963e-08
mod(mdg4)	mod(mdg4)-RK	0.156467	2.1559e-08
CG30159	CG30159-RB	1.33883	2.16016e-08
mod(mdg4)	mod(mdg4)-RL	0.1574	2.16536e-08
ps	ps-RD	0.245367	2.16621e-08
ps	ps-RC	0.245367	2.16621e-08
ps	ps-RL	0.245367	2.16621e-08
cnc	cnc-RB	0.2621	2.18665e-08
Prosap	Prosap-RA	0.0426333	2.19396e-08
Prosap	Prosap-RC	0.0426333	2.19396e-08
Prosap	Prosap-RE	0.0426333	2.19396e-08
CG12075	CG12075-RE	0.1705	2.28549e-08
Tsp42Ea	Tsp42Ea-RB	0.613467	2.29621e-08
Tsp42Ea	Tsp42Ea-RC	0.613467	2.29621e-08
CG45186	CG45186-RY	0.0878667	2.30587e-08
Past1	Past1-RA	0.4214	2.39717e-08
ogre	ogre-RB	0.5083	2.40504e-08
CG5001	CG5001-RD	0.297233	2.46826e-08
Mob2	Mob2-RD	0.116167	2.51056e-08
Lasp	Lasp-RB	0.1118	2.51328e-08
ps	ps-RI	0.227833	2.52712e-08
RpL36A	RpL36A-RA	1.55553	2.5415e-08
mod(mdg4)	mod(mdg4)-RI	0.149833	2.55471e-08
RpL36A	RpL36A-RB	1.47927	2.56397e-08
jigr1	jigr1-RE	0.328467	2.64546e-08
His3.3B	His3.3B-RE	0.6363	2.67203e-08
CG42389	CG42389-RH	0.091	2.68121e-08
CG10433	CG10433-RC	0.9531	2.69692e-08
mamo	mamo-RF	0.0624333	2.736e-08
eIF-4a	eIF-4a-RD	0.686933	2.74572e-08
CG42389	CG42389-RF	0.0928	2.75732e-08
CG44325	CG44325-RD	0.4288	2.76497e-08
Prosap	Prosap-RD	0.0416333	2.7681e-08
ogre	ogre-RA	0.463433	2.79126e-08
Rho1	Rho1-RG	0.7247	2.86306e-08
eIF5B	eIF5B-RC	0.123433	2.90757e-08
eIF5B	eIF5B-RF	0.123433	2.90757e-08
Hsp23	Hsp23-RB	2.02017	2.92567e-08
eIF-4a	eIF-4a-RF	0.672467	2.97115e-08
simj	simj-RE	0.135567	2.98936e-08
Oatp30B	Oatp30B-RA	0.205333	3.0024e-08
Oatp30B	Oatp30B-RB	0.205333	3.0024e-08
Trp1	Trp1-RD	0.865133	3.00542e-08
Oatp30B	Oatp30B-RC	0.205333	3.04063e-08
jigr1	jigr1-RA	0.3324	3.11821e-08
jigr1	jigr1-RB	0.3324	3.11821e-08
jigr1	jigr1-RD	0.3324	3.11821e-08
CG1299	CG1299-RA	0.602467	3.11886e-08
CG1299	CG1299-RB	0.602467	3.11886e-08
eas	eas-RF	0.4029	3.12547e-08
eas	eas-RJ	0.4029	3.12547e-08
CG30280	CG30280-RC	1.91323	3.22387e-08
eas	eas-RB	0.4029	3.31818e-08
eas	eas-RA	0.4029	3.31818e-08
eas	eas-RG	0.4029	3.31818e-08
eas	eas-RH	0.4029	3.31818e-08
eas	eas-RI	0.4029	3.31818e-08
TFAM	TFAM-RA	1.19193	3.32759e-08
CG32280	CG32280-RC	0.716433	3.34713e-08
CG3036	CG3036-RA	0.253767	3.39353e-08
CG17272	CG17272-RA	1.61893	3.42979e-08
CG12991	CG12991-RA	0.172067	3.4311e-08
Eip75B	Eip75B-RD	0.2978	3.54522e-08
CG3036	CG3036-RB	0.261267	3.54861e-08
CG12991	CG12991-RC	0.168733	3.56533e-08
CG12991	CG12991-RD	0.168733	3.56533e-08
CG12991	CG12991-RE	0.168733	3.56533e-08
CG12991	CG12991-RF	0.168733	3.56533e-08
Np	Np-RB	0.2432	3.58222e-08
Mkp3	Mkp3-RB	0.137467	3.62253e-08
mtd	mtd-RI	0.339433	3.63189e-08
luna	luna-RB	0.0371	3.73322e-08
Pdk1	Pdk1-RJ	0.318467	3.74295e-08
Eno	Eno-RE	0.507133	3.7525e-08
Rho1	Rho1-RD	0.811667	3.75349e-08
CG6191	CG6191-RB	0.200133	3.75766e-08
CG2292	CG2292-RA	0.661933	3.78843e-08
CG17600	CG17600-RA	0.1672	3.91538e-08
CG17600	CG17600-RD	0.1672	3.91538e-08
spi	spi-RE	0.515033	3.91849e-08
spi	spi-RB	0.515033	3.91849e-08
FER	FER-RD	0.553167	4.02684e-08
CG1648	CG1648-RA	0.302067	4.03863e-08
Invadolysin	Invadolysin-RA	0.173067	4.04979e-08
GEFmeso	GEFmeso-RE	0.0741	4.07337e-08
GEFmeso	GEFmeso-RF	0.0741	4.07337e-08
Gapdh2	Gapdh2-RA	1.3415	4.19565e-08
CG9821	CG9821-RA	0.826333	4.23148e-08
CG8483	CG8483-RA	0.6555	4.26061e-08
twin	twin-RA	0.107867	4.29381e-08
twin	twin-RF	0.107867	4.29381e-08
chic	chic-RB	0.402933	4.3039e-08
ZnT77C	ZnT77C-RB	0.290167	4.30693e-08
Pdk1	Pdk1-RD	0.3422	4.41692e-08
Past1	Past1-RB	0.3956	4.42394e-08
CG30460	CG30460-RE	0.166367	4.43647e-08
Sclp	Sclp-RB	1.50897	4.47754e-08
CG1648	CG1648-RC	0.289567	4.4778e-08
bru-2	bru-2-RH	0.120033	4.50992e-08
Desat1	Desat1-RC	0.507833	4.58165e-08
Spn27A	Spn27A-RB	0.8967	4.68977e-08
aop	aop-RD	0.546167	4.74706e-08
Eno	Eno-RB	0.5239	4.75718e-08
CG45088	CG45088-RA	0.199067	4.80531e-08
CG6191	CG6191-RA	0.199067	4.80531e-08
CG6191	CG6191-RC	0.199067	4.80531e-08
Eip75B	Eip75B-RA	0.1396	4.8194e-08
E(spl)m7-HLH	E(spl)m7-HLH-RA	1.42767	4.93507e-08
Baldspot	Baldspot-RB	0.310467	5.0258e-08
CG44325	CG44325-RA	0.55	5.06194e-08
Tie	Tie-RA	0.1272	5.11266e-08
drm	drm-RA	0.391633	5.3263e-08
drm	drm-RC	0.391633	5.3263e-08
CG5445	CG5445-RG	0.188333	5.37053e-08
aop	aop-RA	0.5172	5.41468e-08
Cyp301a1	Cyp301a1-RA	0.8116	5.42961e-08
eas	eas-RC	0.413267	5.48364e-08
chic	chic-RC	0.3824	5.50428e-08
Myb	Myb-RD	0.8488	5.60755e-08
Baldspot	Baldspot-RA	0.301767	5.70754e-08
GstD1	GstD1-RA	1.23753	5.75647e-08
GstD1	GstD1-RB	1.23753	5.75647e-08
puc	puc-RB	0.250567	5.856e-08
mthl10	mthl10-RA	0.298867	5.9314e-08
Mkp3	Mkp3-RC	0.134567	5.95433e-08
RpS27A	RpS27A-RA	1.02037	6.05332e-08
NitFhit	NitFhit-RA	1.2926	6.08357e-08
qsm	qsm-RB	0.2279	6.14532e-08
Myb	Myb-RA	0.8488	6.24657e-08
Myb	Myb-RB	0.8488	6.24657e-08
Myb	Myb-RE	0.8488	6.24657e-08
chic	chic-RF	0.404133	6.53343e-08
CG6424	CG6424-RD	0.252067	6.5365e-08
Gapdh2	Gapdh2-RC	1.31917	6.6776e-08
Trl	Trl-RF	0.300967	6.69102e-08
Msp300	Msp300-RE	0.0859333	6.75441e-08
CG11370	CG11370-RA	1.24417	6.9331e-08
CG11370	CG11370-RB	1.24417	6.9331e-08
CG2211	CG2211-RA	0.9956	7.01028e-08
Adam	Adam-RB	1.0808	7.08623e-08
C3G	C3G-RE	0.1759	7.16893e-08
C3G	C3G-RF	0.1759	7.16893e-08
C3G	C3G-RK	0.1759	7.16893e-08
fwd	fwd-RA	0.266433	7.20665e-08
CG16786	CG16786-RA	0.602167	7.52897e-08
CG16786	CG16786-RC	0.588833	7.59321e-08
Fkbp14	Fkbp14-RC	0.377567	7.59327e-08
CG6891	CG6891-RA	0.545167	7.61273e-08
CG6145	CG6145-RA	0.2688	8.08015e-08
ogre	ogre-RE	0.7997	8.1621e-08
loco	loco-RH	0.198	8.24212e-08
sni	sni-RB	0.965533	8.24367e-08
CG6424	CG6424-RB	0.261733	8.46615e-08
chic	chic-RE	0.372933	8.6944e-08
CG42684	CG42684-RB	0.169767	8.76792e-08
milt	milt-RC	0.1766	8.84392e-08
Dp1	Dp1-RE	0.313567	8.89139e-08
esg	esg-RA	0.900867	8.99292e-08
CG7272	CG7272-RA	0.816267	9.04555e-08
fwd	fwd-RB	0.284133	9.05529e-08
fwd	fwd-RD	0.284133	9.05529e-08
Hsp23	Hsp23-RA	1.9633	9.06415e-08
Dys	Dys-RE	0.0947667	9.06983e-08
Dys	Dys-RJ	0.0947667	9.06983e-08
CG6051	CG6051-RC	0.105967	9.16098e-08
CG6051	CG6051-RD	0.105967	9.16098e-08
eIF-4a	eIF-4a-RB	0.705067	9.31696e-08
CG9855	CG9855-RA	1.03947	9.36942e-08
GstE12	GstE12-RA	1.48183	9.44148e-08
GstE12	GstE12-RB	1.48183	9.44148e-08
CG17337	CG17337-RC	1.01323	9.4965e-08
puc	puc-RA	0.2389	9.50819e-08
CG42388	CG42388-RC	0.1905	9.52207e-08
CG42388	CG42388-RD	0.1905	9.52207e-08
CG6145	CG6145-RE	0.252533	9.58851e-08
Mob2	Mob2-RA	0.1118	9.63741e-08
Gasp	Gasp-RB	0.208167	9.74222e-08
sky	sky-RF	0.2563	9.75238e-08
CG3638	CG3638-RJ	0.168133	9.84156e-08
CG32815	CG32815-RC	0.411333	9.86189e-08
CG44325	CG44325-RC	0.5043	9.8696e-08
Mkp3	Mkp3-RD	0.131633	9.87509e-08
Lmpt	Lmpt-RF	0.2625	9.8778e-08
Lmpt	Lmpt-RC	0.2625	9.8778e-08
ImpL2	ImpL2-RB	0.759833	9.92409e-08
Treh	Treh-RG	0.209167	9.96574e-08
Imp	Imp-RC	0.203233	9.98155e-08
Gyk	Gyk-RA	0.646767	1.00307e-07
CG42388	CG42388-RH	0.179667	1.01317e-07
CG43954	CG43954-RA	0.111567	1.02228e-07
Lasp	Lasp-RA	0.111567	1.02228e-07
Lasp	Lasp-RC	0.111567	1.02228e-07
Lasp	Lasp-RD	0.111567	1.02228e-07
Adam	Adam-RA	1.01043	1.03874e-07
velo	velo-RA	0.272	1.03965e-07
velo	velo-RC	0.272	1.03965e-07
CG31955	CG31955-RA	1.55693	1.04089e-07
CG31955	CG31955-RB	1.55693	1.04089e-07
CG8740	CG8740-RA	0.320967	1.0558e-07
crol	crol-RI	0.276467	1.08602e-07
Vha100-2	Vha100-2-RB	0.355433	1.09057e-07
mnb	mnb-RG	0.194567	1.09231e-07
mnb	mnb-RF	0.194567	1.09231e-07
CG15822	CG15822-RD	0.278433	1.10152e-07
CG15822	CG15822-RE	0.278433	1.10152e-07
CG15822	CG15822-RF	0.278433	1.10152e-07
CG15822	CG15822-RG	0.278433	1.10152e-07
fd68A	fd68A-RK	0.376267	1.11047e-07
fd68A	fd68A-RN	0.376267	1.11047e-07
fd68A	fd68A-RO	0.376267	1.11047e-07
GstE12	GstE12-RC	1.48183	1.11904e-07
fd68A	fd68A-RG	0.3806	1.1266e-07
fd68A	fd68A-RP	0.3806	1.1266e-07
CG3262	CG3262-RE	0.364067	1.15211e-07
SNF4Agamma	SNF4Agamma-RC	0.112533	1.15223e-07
mtd	mtd-RH	0.466033	1.16e-07
CG44325	CG44325-RE	0.411667	1.16699e-07
kirre	kirre-RG	0.0250333	1.16894e-07
milt	milt-RD	0.1978	1.19161e-07
milt	milt-RF	0.1978	1.19161e-07
Amun	Amun-RB	0.517733	1.20019e-07
Atg1	Atg1-RB	0.1287	1.2089e-07
CG31955	CG31955-RD	1.58987	1.22323e-07
Pen	Pen-RA	0.788367	1.23485e-07
CG1827	CG1827-RD	1.14677	1.23523e-07
Nmdmc	Nmdmc-RB	0.3265	1.23874e-07
Pxd	Pxd-RA	0.167533	1.24764e-07
Pxd	Pxd-RC	0.167533	1.24764e-07
CG6231	CG6231-RB	0.3095	1.25777e-07
CG31038	CG31038-RA	0.104233	1.25976e-07
CG31038	CG31038-RE	0.104233	1.25976e-07
Sod3	Sod3-RB	0.718467	1.25989e-07
Sod3	Sod3-RA	0.718467	1.25989e-07
chic	chic-RA	0.3697	1.29431e-07
rhea	rhea-RB	0.0845	1.32671e-07
rhea	rhea-RG	0.0845	1.32671e-07
btl	btl-RB	0.927767	1.3283e-07
mod(mdg4)	mod(mdg4)-RM	0.175367	1.35066e-07
Pde8	Pde8-RB	0.234467	1.36379e-07
mtd	mtd-RQ	0.438767	1.39361e-07
CG44532	CG44532-RA	1.53097	1.41247e-07
CG7872	CG7872-RA	1.09857	1.45639e-07
CG44325	CG44325-RB	0.444167	1.47288e-07
Gasp	Gasp-RA	0.314967	1.47842e-07
CG8331	CG8331-RB	1.0802	1.48566e-07
l(1)G0320	l(1)G0320-RB	1.0825	1.49798e-07
fd68A	fd68A-RJ	0.395467	1.50152e-07
CG45186	CG45186-RM	0.0664	1.52573e-07
ZnT63C	ZnT63C-RA	0.445267	1.5567e-07
ZnT63C	ZnT63C-RC	0.445267	1.5567e-07
ZnT63C	ZnT63C-RD	0.445267	1.5567e-07
ZnT63C	ZnT63C-RF	0.445267	1.5567e-07
Gyk	Gyk-RB	0.6482	1.557e-07
E(spl)m2-BFM	E(spl)m2-BFM-RA	1.88097	1.56284e-07
lea	lea-RA	0.1013	1.60606e-07
lea	lea-RB	0.1013	1.60606e-07
nau	nau-RA	0.4618	1.6118e-07
nau	nau-RB	0.4618	1.6118e-07
AdamTS-A	AdamTS-A-RE	0.1414	1.69672e-07
ZnT63C	ZnT63C-RB	0.424233	1.72937e-07
Mlc-c	Mlc-c-RA	0.6897	1.76441e-07
CG32512	CG32512-RD	0.514733	1.77972e-07
CG45186	CG45186-RE	0.0687667	1.78434e-07
Act42A	Act42A-RA	1.0585	1.79123e-07
pit	pit-RB	0.458733	1.80184e-07
CG3638	CG3638-RB	0.1578	1.81547e-07
CG11357	CG11357-RA	0.1935	1.85374e-07
CG11357	CG11357-RC	0.1935	1.85374e-07
RpL23	RpL23-RA	1.22607	1.8569e-07
CG8399	CG8399-RA	0.3299	1.85819e-07
CG8399	CG8399-RB	0.3299	1.85819e-07
Taf12	Taf12-RB	1.04163	1.86206e-07
Taf12	Taf12-RA	1.04163	1.86206e-07
Taf12	Taf12-RD	1.04163	1.86206e-07
Taf12	Taf12-RE	1.04163	1.86206e-07
CG32512	CG32512-RA	0.5222	1.86993e-07
Lmpt	Lmpt-RO	0.2719	1.8714e-07
CG11357	CG11357-RD	0.192233	1.89166e-07
Nmdmc	Nmdmc-RA	0.323533	1.89614e-07
ena	ena-RD	0.133267	1.9299e-07
Eno	Eno-RC	0.557667	1.94825e-07
Eno	Eno-RD	0.557667	1.94825e-07
vri	vri-RC	0.248233	1.97697e-07
CG45186	CG45186-RN	0.069	2.02254e-07
CG9855	CG9855-RC	0.926333	2.02602e-07
CG1764	CG1764-RB	0.351733	2.0359e-07
CG45186	CG45186-RL	0.0681333	2.04814e-07
CG45186	CG45186-RF	0.0681333	2.04814e-07
rap	rap-RA	0.229633	2.07384e-07
ena	ena-RA	0.130133	2.09625e-07
ena	ena-RC	0.130133	2.09625e-07
ena	ena-RE	0.130133	2.09625e-07
CG32815	CG32815-RD	0.3725	2.10677e-07
SNF4Agamma	SNF4Agamma-RP	0.108	2.11884e-07
Gk	Gk-RC	0.3076	2.16738e-07
Gk	Gk-RE	0.3076	2.16738e-07
vri	vri-RD	0.490933	2.21424e-07
Np	Np-RA	0.245633	2.21733e-07
Cct1	Cct1-RF	0.314333	2.22094e-07
GstT4	GstT4-RA	0.552567	2.26724e-07
cer	cer-RA	1.719	2.27043e-07
CG43394	CG43394-RA	0.5237	2.27387e-07
Oda	Oda-RA	0.292933	2.27738e-07
Pdp1	Pdp1-RF	0.0636667	2.32604e-07
Pdp1	Pdp1-RO	0.0636667	2.32604e-07
arm	arm-RA	0.333433	2.33514e-07
CG12017	CG12017-RA	0.2602	2.37693e-07
CG12017	CG12017-RB	0.2602	2.37693e-07
CG12017	CG12017-RC	0.2602	2.37693e-07
CG12017	CG12017-RD	0.2602	2.37693e-07
Tsp42Ea	Tsp42Ea-RA	0.276233	2.38001e-07
CG5001	CG5001-RC	0.284467	2.40072e-07
CG5001	CG5001-RA	0.284467	2.40072e-07
CG3638	CG3638-RG	0.178567	2.41306e-07
CG3638	CG3638-RL	0.178567	2.41306e-07
Cct1	Cct1-RA	0.326333	2.41464e-07
Cct1	Cct1-RE	0.326333	2.41464e-07
HmgD	HmgD-RD	0.2061	2.44772e-07
CG14997	CG14997-RA	0.7576	2.46153e-07
arm	arm-RD	0.316367	2.47386e-07
CG12207	CG12207-RF	0.3115	2.47578e-07
CG44286	CG44286-RC	0.968033	2.48002e-07
CG8788	CG8788-RC	0.968033	2.48002e-07
tlk	tlk-RH	0.0559	2.51508e-07
crol	crol-RA	0.2842	2.52085e-07
crol	crol-RB	0.276367	2.53438e-07
crol	crol-RC	0.276367	2.53438e-07
crol	crol-RE	0.276367	2.53438e-07
tlk	tlk-RL	0.0567333	2.551e-07
tlk	tlk-RJ	0.0567333	2.551e-07
gk	gk-RB	0.379233	2.57065e-07
CG15861	CG15861-RB	1.12673	2.58374e-07
Atg1	Atg1-RA	0.1203	2.65688e-07
CG5835	CG5835-RA	0.541	2.67918e-07
CG12207	CG12207-RB	0.306	2.69241e-07
CG12207	CG12207-RG	0.306	2.69241e-07
vri	vri-RA	0.454433	2.70267e-07
Rcd6	Rcd6-RA	0.444133	2.7509e-07
Rcd6	Rcd6-RB	0.444133	2.7509e-07
p38c	p38c-RA	1.1296	2.79501e-07
gw	gw-RI	0.189633	2.89273e-07
Actn	Actn-RC	0.140133	2.89821e-07
CG32676	CG32676-RA	0.1225	2.9049e-07
CG5758	CG5758-RF	0.2892	2.92142e-07
Gk	Gk-RF	0.298833	2.92969e-07
CG11438	CG11438-RB	0.821267	2.95602e-07
Gk	Gk-RD	0.3258	3.0199e-07
vri	vri-RF	0.439	3.03769e-07
CG5758	CG5758-RC	0.2848	3.05128e-07
CG5758	CG5758-RE	0.2848	3.05128e-07
CG7530	CG7530-RA	0.475633	3.0623e-07
CG7530	CG7530-RB	0.475633	3.0623e-07
mrj	mrj-RB	0.342933	3.07693e-07
mrj	mrj-RE	0.342933	3.07693e-07
mrj	mrj-RG	0.342933	3.07693e-07
east	east-RE	0.2274	3.13698e-07
Irk1	Irk1-RF	0.247333	3.16211e-07
CG3638	CG3638-RH	0.1632	3.2109e-07
CG3638	CG3638-RI	0.1632	3.2109e-07
CG3638	CG3638-RK	0.1632	3.2109e-07
CG3638	CG3638-RF	0.170667	3.22498e-07
[truncated: 3,478 more rows]

## Sheet: Genes sig. expressed in WT
Gene	Transcript	Dam-pol2/Dam ratio	FDR
hth	hth-RA	0.385233	3.87686e-82
Egfr	Egfr-RA	0.698267	4.75867e-58
Samuel	Samuel-RA	0.439433	2.06304e-51
CG9850	CG9850-RC	0.498933	3.74988e-50
CG9850	CG9850-RA	0.5014	3.8443e-50
CG9850	CG9850-RD	0.5014	3.8443e-50
CG9850	CG9850-RE	0.5014	3.8443e-50
CG9850	CG9850-RF	0.5014	3.8443e-50
Shroom	Shroom-RH	0.5042	3.77565e-46
Shroom	Shroom-RD	0.5042	3.77565e-46
fz2	fz2-RG	0.671267	3.98814e-44
Samuel	Samuel-RD	0.536533	2.90894e-43
Samuel	Samuel-RB	0.435067	7.12915e-43
fz2	fz2-RB	0.7092	1.37062e-42
fz2	fz2-RF	0.7092	1.37062e-42
fz2	fz2-RC	0.692967	1.57469e-42
hth	hth-RI	0.613867	2.89618e-42
for	for-RI	0.565467	3.11122e-41
for	for-RA	0.565467	3.11122e-41
hth	hth-RF	0.664633	7.62564e-41
Samuel	Samuel-RE	0.562033	1.0268e-36
br	br-RA	0.419767	8.10044e-36
br	br-RL	0.419767	8.10044e-36
AdamTS-A	AdamTS-A-RB	0.4838	1.95167e-35
EcR	EcR-RB	0.399833	2.56105e-35
lola	lola-RAA	0.467367	2.72052e-35
EcR	EcR-RC	0.3812	2.92251e-35
mtd	mtd-RP	0.404333	2.6694e-34
mtd	mtd-RN	0.404333	2.6694e-34
mtd	mtd-RJ	0.404333	2.6694e-34
mtd	mtd-RU	0.404333	2.6694e-34
mtd	mtd-RV	0.404333	2.6694e-34
mtd	mtd-RY	0.404333	2.6694e-34
trh	trh-RC	0.601233	2.99377e-34
trh	trh-RF	0.601233	2.99377e-34
mtd	mtd-RB	0.380667	2.23991e-33
CG8552	CG8552-RD	0.546167	1.26083e-32
CG8552	CG8552-RA	0.546167	1.50411e-32
kay	kay-RD	0.5458	1.52545e-32
bowl	bowl-RB	1.069	1.78102e-32
bowl	bowl-RC	1.069	1.78102e-32
bowl	bowl-RF	1.069	1.78102e-32
bowl	bowl-RG	1.069	1.78102e-32
zip	zip-RE	0.785567	2.26e-32
bowl	bowl-RD	1.09867	2.42895e-32
bowl	bowl-RH	1.0864	2.66374e-32
lola	lola-RH	0.383133	3.10028e-32
lola	lola-RC	0.412567	4.22983e-32
CG4622	CG4622-RC	0.6829	5.4161e-32
zip	zip-RB	0.771067	1.06948e-31
zip	zip-RA	0.7851	1.11854e-31
zip	zip-RC	0.7851	1.11854e-31
zip	zip-RD	0.7851	1.11854e-31
zip	zip-RF	0.7851	1.11854e-31
zip	zip-RH	0.7851	1.11854e-31
zip	zip-RI	0.7851	1.11854e-31
for	for-RH	0.626533	1.9227e-31
zip	zip-RG	0.7743	9.75289e-31
N	N-RA	0.608433	1.0238e-30
N	N-RB	0.6165	1.1634e-30
Mmp1	Mmp1-RC	0.8097	1.25919e-30
Mmp1	Mmp1-RI	0.8097	1.25919e-30
Mmp1	Mmp1-RL	0.8097	1.25919e-30
br	br-RJ	0.429667	3.68394e-30
stumps	stumps-RC	0.5042	8.37364e-30
hng3	hng3-RB	0.660367	8.65486e-30
kibra	kibra-RA	0.507133	1.31718e-29
how	how-RB	0.463533	1.3177e-29
kibra	kibra-RB	0.490533	1.4868e-29
how	how-RC	0.442833	1.64248e-29
Shroom	Shroom-RG	0.723733	2.54867e-29
mtd	mtd-RG	0.446767	3.23886e-29
mtd	mtd-RK	0.446767	3.23886e-29
mtd	mtd-RO	0.446767	3.29752e-29
how	how-RE	0.381467	3.75963e-29
kay	kay-RA	0.624567	6.14881e-29
kay	kay-RG	0.624567	6.14881e-29
ITP	ITP-RG	0.705867	7.82298e-29
CG8552	CG8552-RB	0.521567	2.36887e-28
apt	apt-RB	0.437033	2.49111e-28
apt	apt-RD	0.437033	2.49111e-28
apt	apt-RE	0.437033	2.49111e-28
ex	ex-RA	0.712233	2.76618e-28
ex	ex-RB	0.712233	2.76618e-28
Akap200	Akap200-RD	0.680867	3.06284e-28
Akap200	Akap200-RF	0.668667	3.07863e-28
Akap200	Akap200-RE	0.682567	3.14807e-28
Akap200	Akap200-RA	0.693733	4.41003e-28
br	br-RH	0.456033	6.09277e-28
CG8552	CG8552-RE	0.524967	1.73983e-27
Mmp1	Mmp1-RG	0.838833	7.69482e-27
ITP	ITP-RE	0.662333	1.4438e-26
ITP	ITP-RD	0.662333	1.4438e-26
apt	apt-RC	0.4568	1.55938e-26
Oatp74D	Oatp74D-RA	0.481767	1.70695e-26
Oatp74D	Oatp74D-RC	0.481767	1.70695e-26
Mmp1	Mmp1-RE	0.814667	2.03419e-26
Mmp1	Mmp1-RH	0.814667	2.03419e-26
Mmp1	Mmp1-RJ	0.814667	2.03419e-26
Mmp1	Mmp1-RK	0.814667	2.03419e-26
ttk	ttk-RE	0.5342	4.06284e-26
ITP	ITP-RC	0.748833	4.32414e-26
br	br-RC	0.4398	1.15238e-25
Oatp74D	Oatp74D-RD	0.4757	1.72156e-25
Oatp74D	Oatp74D-RE	0.4757	1.72156e-25
Tgi	Tgi-RB	0.671033	2.90982e-25
tkv	tkv-RC	0.469767	3.28671e-25
fru	fru-RL	0.5227	3.32467e-25
Mmp1	Mmp1-RD	0.838367	5.7727e-25
CG8312	CG8312-RC	0.420667	6.44065e-25
CG8312	CG8312-RD	0.420667	6.44065e-25
CG8312	CG8312-RA	0.4117	7.29226e-25
tkv	tkv-RB	0.4955	8.10011e-25
dar1	dar1-RB	0.453267	1.20757e-24
emp	emp-RE	1.14893	1.66191e-24
ec	ec-RB	0.405567	1.77635e-24
br	br-RP	0.4209	2.34051e-24
br	br-RB	0.4209	2.44997e-24
br	br-RQ	0.4209	2.44997e-24
btl	btl-RA	1.24033	3.10318e-24
Pino	Pino-RB	0.6116	4.44388e-24
fru	fru-RD	0.573267	4.67434e-24
tkv	tkv-RD	0.579833	5.05502e-24
stumps	stumps-RE	0.646567	5.73991e-24
fru	fru-RA	0.523333	7.60503e-24
CG17646	CG17646-RB	0.520333	9.62009e-24
T48	T48-RB	0.440367	1.15101e-23
T48	T48-RA	0.440367	1.16304e-23
Traf4	Traf4-RE	0.5328	1.39931e-23
Xrp1	Xrp1-RB	0.7754	1.77656e-23
lola	lola-RT	0.434067	1.93892e-23
lola	lola-RI	0.385867	2.24426e-23
btl	btl-RB	1.32323	5.27966e-23
br	br-RE	0.4294	1.03151e-22
br	br-RG	0.4294	1.03151e-22
CG8740	CG8740-RB	0.4881	1.15388e-22
CG8740	CG8740-RC	0.4881	1.15388e-22
CG8740	CG8740-RD	0.4881	1.15388e-22
CG8740	CG8740-RE	0.4881	1.15388e-22
br	br-RI	0.406033	1.19111e-22
mfas	mfas-RB	1.10077	1.24727e-22
mfas	mfas-RC	1.10077	1.24727e-22
mfas	mfas-RP	1.10077	1.24727e-22
mfas	mfas-RD	1.10077	1.24727e-22
mfas	mfas-RE	1.10077	1.24727e-22
mfas	mfas-RF	1.10077	1.24727e-22
mfas	mfas-RG	1.10077	1.24727e-22
mfas	mfas-RH	1.10077	1.24727e-22
mfas	mfas-RI	1.10077	1.24727e-22
mfas	mfas-RJ	1.10077	1.24727e-22
mfas	mfas-RK	1.10077	1.24727e-22
mfas	mfas-RM	1.10077	1.24727e-22
mfas	mfas-RN	1.10077	1.24727e-22
mfas	mfas-RO	1.10077	1.24727e-22
mfas	mfas-RL	1.10077	1.24727e-22
lola	lola-RF	0.5233	1.3449e-22
lola	lola-RU	0.4246	2.01468e-22
l(2)08717	l(2)08717-RB	1.29557	3.95514e-22
aop	aop-RB	0.542633	4.30673e-22
aop	aop-RC	0.542633	4.30673e-22
vri	vri-RE	0.3958	1.71093e-21
CrebA	CrebA-RA	0.5122	3.04923e-21
CLIP-190	CLIP-190-RO	0.424567	3.32788e-21
CrebA	CrebA-RB	0.476167	3.64368e-21
ttk	ttk-RF	0.501933	4.27713e-21
mtd	mtd-RF	0.4804	4.92185e-21
mtd	mtd-RAA	0.4804	4.92185e-21
CycG	CycG-RF	0.600267	5.19296e-21
CG43394	CG43394-RC	0.622367	6.96386e-21
aop	aop-RE	0.539633	7.24395e-21
Dad	Dad-RA	0.5455	8.40817e-21
Dad	Dad-RC	0.5455	8.40817e-21
Mmp1	Mmp1-RF	0.8512	9.32093e-21
mtd	mtd-RM	0.458467	1.03281e-20
emp	emp-RC	1.13907	1.03736e-20
apt	apt-RA	0.622967	1.04967e-20
emp	emp-RB	1.15873	1.19699e-20
Dad	Dad-RB	0.575333	1.3555e-20
Tm1	Tm1-RK	0.383033	1.65874e-20
CycG	CycG-RD	0.6393	1.66584e-20
magu	magu-RA	0.754267	2.02791e-20
magu	magu-RF	0.754267	2.02791e-20
magu	magu-RD	0.754267	2.02791e-20
sick	sick-RG	0.381733	3.03325e-20
sick	sick-RE	0.381733	3.03325e-20
lola	lola-RK	0.545	3.65389e-20
CG42666	CG42666-RJ	0.493133	7.21273e-20
CG42666	CG42666-RE	0.4945	7.64324e-20
CG42666	CG42666-RI	0.4789	8.18331e-20
lola	lola-RV	0.542267	9.80015e-20
trh	trh-RD	0.768967	9.88763e-20
trh	trh-RE	0.768967	9.88763e-20
trh	trh-RA	0.768967	9.88763e-20
trh	trh-RB	0.768967	9.88763e-20
trh	trh-RG	0.768967	9.88763e-20
Pka-C1	Pka-C1-RB	0.4932	1.04832e-19
Pka-C1	Pka-C1-RC	0.4932	1.04832e-19
mtd	mtd-RI	0.482667	1.78009e-19
Tm1	Tm1-RF	0.3799	2.3457e-19
Swim	Swim-RB	0.648133	2.71726e-19
nahoda	nahoda-RA	0.437033	2.82357e-19
nahoda	nahoda-RB	0.437033	2.82357e-19
nahoda	nahoda-RC	0.437033	2.82357e-19
CG42666	CG42666-RH	0.528733	3.12031e-19
CG8630	CG8630-RA	1.52337	3.36034e-19
pio	pio-RB	0.521667	3.59272e-19
pio	pio-RD	0.521667	3.59272e-19
Tm1	Tm1-RL	0.392633	3.96672e-19
lola	lola-RD	0.531333	5.60012e-19
Su(Tpl)	Su(Tpl)-RA	0.475367	7.73753e-19
ec	ec-RA	0.718967	8.72111e-19
CG45050	CG45050-RC	0.561133	1.257e-18
CG45050	CG45050-RF	0.517	1.56531e-18
Pka-C1	Pka-C1-RD	0.496367	1.72418e-18
CycG	CycG-RC	0.694067	2.35265e-18
CG31523	CG31523-RB	0.5676	2.37221e-18
elB	elB-RC	0.4078	2.5461e-18
elB	elB-RD	0.4078	2.5461e-18
Chd64	Chd64-RB	0.893133	2.754e-18
for	for-RE	0.772733	2.9542e-18
for	for-RC	0.772733	2.9542e-18
for	for-RJ	0.772733	2.9542e-18
for	for-RD	0.772733	2.9542e-18
for	for-RG	0.772733	2.9542e-18
CycG	CycG-RA	0.6293	4.32343e-18
CycG	CycG-RB	0.6293	4.32343e-18
Gp150	Gp150-RA	0.7716	4.32369e-18
Gp150	Gp150-RB	0.7716	4.32369e-18
Gp150	Gp150-RC	0.7716	4.32369e-18
mrj	mrj-RD	0.461167	4.37868e-18
mrj	mrj-RH	0.461167	4.37868e-18
foi	foi-RD	0.7493	5.19733e-18
ttk	ttk-RB	0.6992	5.6266e-18
CG31523	CG31523-RE	0.5612	5.62712e-18
lola	lola-RE	0.520467	5.84976e-18
CG8925	CG8925-RA	0.941167	5.86343e-18
CG8925	CG8925-RB	0.941167	5.86343e-18
blot	blot-RD	0.456933	6.02683e-18
Su(Tpl)	Su(Tpl)-RB	0.418467	6.05612e-18
Su(Tpl)	Su(Tpl)-RC	0.418467	6.05612e-18
CG42666	CG42666-RB	0.583767	7.05833e-18
ITP	ITP-RF	0.6898	7.51459e-18
ken	ken-RA	1.15677	8.63085e-18
crol	crol-RD	0.4522	9.17459e-18
crol	crol-RF	0.4522	9.17459e-18
crol	crol-RG	0.4522	9.17459e-18
crol	crol-RH	0.4522	9.17459e-18
p130CAS	p130CAS-RD	0.4449	9.361e-18
kay	kay-RB	0.6749	1.07253e-17
l(2)08717	l(2)08717-RA	1.22497	1.07714e-17
CG3764	CG3764-RB	0.388967	1.20637e-17
l(2)08717	l(2)08717-RC	1.15517	1.48906e-17
tna	tna-RD	0.3916	2.25159e-17
CG31523	CG31523-RC	0.5546	2.3444e-17
if	if-RB	0.409033	3.52273e-17
if	if-RC	0.409033	3.52273e-17
for	for-RK	0.795667	3.72389e-17
if	if-RD	0.4075	4.45369e-17
Moe	Moe-RF	0.4144	4.62152e-17
Moe	Moe-RM	0.4084	5.09257e-17
Moe	Moe-RH	0.418733	5.8458e-17
Moe	Moe-RG	0.412533	6.33455e-17
CG45050	CG45050-RE	0.4925	6.4957e-17
CG45050	CG45050-RG	0.517333	8.37539e-17
CG45050	CG45050-RD	0.517333	8.37539e-17
CG45050	CG45050-RB	0.517333	8.37539e-17
wts	wts-RA	0.446967	1.1112e-16
RhoGAP18B	RhoGAP18B-RH	0.4739	1.22753e-16
Xrp1	Xrp1-RF	0.869967	1.24872e-16
Tgi	Tgi-RA	0.8621	1.29173e-16
crol	crol-RI	0.4315	1.31117e-16
stumps	stumps-RB	0.606833	1.71554e-16
crol	crol-RA	0.4475	1.71559e-16
Gp150	Gp150-RE	0.720033	1.72147e-16
CG17834	CG17834-RA	0.5023	1.79828e-16
CG17834	CG17834-RC	0.5023	1.79828e-16
crol	crol-RB	0.439633	1.94693e-16
crol	crol-RC	0.439633	1.94693e-16
crol	crol-RE	0.439633	1.94693e-16
Cam	Cam-RE	0.481	2.10147e-16
Cht6	Cht6-RH	0.3906	2.14737e-16
Cht6	Cht6-RI	0.3906	2.14737e-16
Cht6	Cht6-RJ	0.3906	2.14737e-16
Cam	Cam-RA	0.462033	2.15442e-16
RasGAP1	RasGAP1-RA	0.479233	2.31902e-16
RasGAP1	RasGAP1-RC	0.479233	2.31902e-16
Xrp1	Xrp1-RG	0.714033	2.36787e-16
Xrp1	Xrp1-RA	0.724433	2.52441e-16
Xrp1	Xrp1-RC	0.724433	2.52441e-16
Xrp1	Xrp1-RE	0.724433	2.52441e-16
RasGAP1	RasGAP1-RB	0.461467	2.56391e-16
PGRP-LC	PGRP-LC-RC	0.888167	2.6901e-16
PGRP-LC	PGRP-LC-RB	0.888167	2.6901e-16
PGRP-LC	PGRP-LC-RI	0.888167	2.6901e-16
CG43394	CG43394-RD	0.655633	2.97595e-16
tna	tna-RA	0.405433	3.01091e-16
Msr-110	Msr-110-RA	0.631867	3.19921e-16
Msr-110	Msr-110-RB	0.631867	3.19921e-16
Msr-110	Msr-110-RD	0.631867	3.19921e-16
CG43394	CG43394-RB	0.637833	3.3765e-16
PGRP-LC	PGRP-LC-RH	0.8761	5.39643e-16
olf186-F	olf186-F-RB	0.416767	5.69261e-16
olf186-F	olf186-F-RF	0.416767	5.69261e-16
cup	cup-RC	0.5698	5.79223e-16
CG34310	CG34310-RD	0.5698	5.79223e-16
ttk	ttk-RA	0.662533	6.23799e-16
drongo	drongo-RI	0.383733	6.35847e-16
foi	foi-RA	0.701433	6.41713e-16
foi	foi-RC	0.701433	6.41713e-16
CG17646	CG17646-RA	0.515967	7.11407e-16
Dl	Dl-RB	0.467767	7.82447e-16
Dl	Dl-RC	0.446367	8.84908e-16
Dl	Dl-RA	0.432167	9.13728e-16
lola	lola-RL	0.6609	1.02603e-15
Sema-5c	Sema-5c-RA	0.4499	1.0376e-15
PGRP-LC	PGRP-LC-RD	0.801567	1.05412e-15
Sema-5c	Sema-5c-RB	0.446933	1.20927e-15
Sip1	Sip1-RA	0.584567	1.4493e-15
lola	lola-RA	0.5966	1.68136e-15
emp	emp-RA	1.0939	1.68594e-15
RhoGAP18B	RhoGAP18B-RB	0.4903	2.17685e-15
RhoGAP18B	RhoGAP18B-RF	0.4903	2.17685e-15
cup	cup-RB	0.574067	2.27788e-15
CG34310	CG34310-RC	0.574067	2.27788e-15
Gbs-70E	Gbs-70E-RA	0.6753	2.37112e-15
lola	lola-RZ	0.5296	2.60613e-15
ec	ec-RC	0.874267	4.61403e-15
PGRP-LC	PGRP-LC-RG	0.907533	4.9125e-15
Tis11	Tis11-RA	0.458467	4.93727e-15
atl	atl-RA	0.635167	5.04966e-15
CG42666	CG42666-RD	0.631367	5.30395e-15
Tis11	Tis11-RC	0.4018	5.37799e-15
bowl	bowl-RA	0.9273	5.91896e-15
CG13900	CG13900-RA	0.8703	6.58655e-15
CG13900	CG13900-RC	0.8703	6.58655e-15
Gbs-70E	Gbs-70E-RB	0.658433	6.67674e-15
loco	loco-RH	0.390667	7.43594e-15
numb	numb-RA	0.418133	8.10401e-15
Cad99C	Cad99C-RB	0.583867	8.30387e-15
ovo	ovo-RB	0.435767	8.33196e-15
Cad99C	Cad99C-RA	0.583867	8.39852e-15
Gbs-70E	Gbs-70E-RC	0.649233	8.55447e-15
mtd	mtd-RC	0.5925	9.16608e-15
ovo	ovo-RE	0.431433	9.38946e-15
Tm1	Tm1-RP	0.4094	1.03588e-14
sas	sas-RC	0.3864	1.33484e-14
sas	sas-RD	0.3864	1.33484e-14
Diap1	Diap1-RB	0.5371	1.59541e-14
CG42327	CG42327-RE	0.395467	1.62505e-14
sas	sas-RB	0.383067	1.69048e-14
sas	sas-RA	0.383067	1.69048e-14
Diap1	Diap1-RF	0.521133	1.81294e-14
if	if-RF	0.387667	2.67693e-14
Gpdh	Gpdh-RG	0.9664	2.70961e-14
bves	bves-RA	0.406467	3.04787e-14
bves	bves-RB	0.4158	3.07904e-14
wdp	wdp-RD	0.4503	3.3693e-14
wdp	wdp-RB	0.4503	3.3693e-14
numb	numb-RD	0.379067	4.01506e-14
PGRP-LC	PGRP-LC-RA	0.915167	4.13462e-14
p130CAS	p130CAS-RG	0.511033	4.95641e-14
CG32473	CG32473-RC	0.713933	9.19255e-14
mtd	mtd-RQ	0.5667	9.96912e-14
csw	csw-RD	0.437467	1.05976e-13
Gpdh	Gpdh-RC	1.02653	1.07893e-13
mtd	mtd-RH	0.6005	1.09627e-13
Cdk4	Cdk4-RD	1.04453	1.22848e-13
CG34417	CG34417-RC	0.589633	1.27742e-13
CG8034	CG8034-RA	0.435267	1.38811e-13
emc	emc-RA	1.03783	1.414e-13
Gpdh	Gpdh-RF	0.967	1.42137e-13
mfas	mfas-RQ	1.04663	1.47512e-13
PRAS40	PRAS40-RA	0.419567	1.49478e-13
shg	shg-RA	0.722067	1.59799e-13
CG17834	CG17834-RF	0.528867	1.61606e-13
ptc	ptc-RA	0.4897	1.84887e-13
Cdk4	Cdk4-RC	0.850867	1.89164e-13
CG9422	CG9422-RC	0.3972	1.91425e-13
CG9422	CG9422-RA	0.409633	1.94506e-13
ttk	ttk-RG	0.5511	1.95066e-13
Cdk4	Cdk4-RA	0.8494	2.1836e-13
Gpdh	Gpdh-RB	1.04367	2.32972e-13
CG9990	CG9990-RB	0.484833	2.52691e-13
CG9990	CG9990-RD	0.484833	2.52691e-13
CG9990	CG9990-RG	0.484833	2.52691e-13
Brf	Brf-RB	0.3936	2.65921e-13
CG31523	CG31523-RF	0.5729	2.71561e-13
Brf	Brf-RA	0.379467	2.76594e-13
Cdk4	Cdk4-RB	0.900133	2.91024e-13
Cdk4	Cdk4-RE	0.8496	3.04456e-13
chn	chn-RA	0.391033	3.70568e-13
chn	chn-RE	0.391033	3.70568e-13
chn	chn-RG	0.391033	3.70568e-13
chn	chn-RH	0.391033	3.70568e-13
ImpL2	ImpL2-RA	0.458167	3.80773e-13
pelo	pelo-RA	0.618	3.89331e-13
Egfr	Egfr-RB	0.486267	3.94253e-13
Treh	Treh-RE	0.414	4.02663e-13
Shroom	Shroom-RF	0.650433	4.25796e-13
babos	babos-RB	0.760167	4.31758e-13
Tis11	Tis11-RD	0.424333	5.45783e-13
wdp	wdp-RC	0.426267	5.62686e-13
magu	magu-RB	0.711867	5.89656e-13
fj	fj-RA	1.41607	6.19445e-13
CG8180	CG8180-RA	0.6245	6.21468e-13
CG8180	CG8180-RB	0.6245	6.21468e-13
lute	lute-RB	0.5533	6.25055e-13
lute	lute-RC	0.5533	6.25055e-13
Cam	Cam-RD	0.4124	6.287e-13
ttk	ttk-RC	0.6765	6.39131e-13
blot	blot-RB	0.4683	6.54106e-13
CG8180	CG8180-RC	0.609767	6.6842e-13
out	out-RA	0.626733	7.76903e-13
Pdk1	Pdk1-RD	0.454767	7.96067e-13
Diap1	Diap1-RA	0.685867	8.41614e-13
Diap1	Diap1-RE	0.685867	8.41614e-13
out	out-RB	0.602333	8.44101e-13
boi	boi-RB	0.3919	8.86985e-13
boi	boi-RE	0.3919	8.86985e-13
boi	boi-RF	0.3919	8.86985e-13
boi	boi-RG	0.3919	8.86985e-13
CG18549	CG18549-RA	0.634633	9.6234e-13
Pdk1	Pdk1-RJ	0.4195	9.6582e-13
CG12581	CG12581-RB	0.5337	1.03869e-12
Myo61F	Myo61F-RC	0.451033	1.06248e-12
Cam	Cam-RB	0.5148	1.11707e-12
Trx-2	Trx-2-RB	1.4947	1.16157e-12
peb	peb-RB	0.750533	1.21386e-12
ZnT63C	ZnT63C-RA	0.538733	1.23945e-12
ZnT63C	ZnT63C-RC	0.538733	1.23945e-12
ZnT63C	ZnT63C-RD	0.538733	1.23945e-12
ZnT63C	ZnT63C-RF	0.538733	1.23945e-12
CG31523	CG31523-RA	0.7542	1.31286e-12
RpL3	RpL3-RH	1.35043	1.36461e-12
Reg-5	Reg-5-RA	1.03003	1.48797e-12
Reg-5	Reg-5-RB	1.03003	1.48797e-12
CG6231	CG6231-RD	0.539633	1.56929e-12
Kr-h1	Kr-h1-RA	0.425	1.5706e-12
CG14830	CG14830-RA	0.384033	1.71037e-12
CG14830	CG14830-RB	0.384033	1.71037e-12
CG14830	CG14830-RC	0.384033	1.71037e-12
mdy	mdy-RA	0.4679	1.7342e-12
mdy	mdy-RB	0.4679	1.7342e-12
mdy	mdy-RC	0.4679	1.7342e-12
ZnT63C	ZnT63C-RB	0.508867	1.85053e-12
Pgk	Pgk-RD	0.8303	1.97249e-12
RpL3	RpL3-RA	1.47523	2.1573e-12
RpL3	RpL3-RG	1.47523	2.1573e-12
Gs2	Gs2-RB	0.8284	2.46834e-12
Gs2	Gs2-RD	0.8284	2.46834e-12
trbl	trbl-RA	0.9791	2.51103e-12
CG42666	CG42666-RC	0.680233	2.54206e-12
babos	babos-RA	0.729567	2.56483e-12
ATPsynC	ATPsynC-RC	1.2297	2.62606e-12
ATPsynC	ATPsynC-RE	1.2297	2.62606e-12
RhoGAP18B	RhoGAP18B-RC	0.3923	2.62852e-12
CG6231	CG6231-RC	0.386733	2.93077e-12
CG32473	CG32473-RA	0.5389	2.93237e-12
RpII215	RpII215-RA	0.8758	2.94639e-12
ATPsynC	ATPsynC-RA	1.2035	3.10102e-12
clos	clos-RD	0.435433	3.10619e-12
Inx3	Inx3-RB	0.762833	3.20482e-12
CG8468	CG8468-RC	0.537933	3.2344e-12
CG8468	CG8468-RA	0.537933	3.2344e-12
CG8468	CG8468-RB	0.537933	3.2344e-12
bif	bif-RB	0.4861	3.84596e-12
bif	bif-RC	0.4861	3.84596e-12
bif	bif-RD	0.4861	3.84596e-12
bif	bif-RE	0.4861	3.84596e-12
bif	bif-RF	0.4861	3.84596e-12
CG9990	CG9990-RF	0.464733	4.40288e-12
DOR	DOR-RE	0.4046	4.44477e-12
CG42666	CG42666-RF	0.634333	4.73018e-12
CG42666	CG42666-RK	0.634333	4.73018e-12
Pdk1	Pdk1-RC	0.522067	5.24267e-12
Pdk1	Pdk1-RA	0.4528	5.29981e-12
Pdk1	Pdk1-RH	0.432567	5.47171e-12
Pdk1	Pdk1-RF	0.432567	5.47171e-12
siz	siz-RA	0.3915	6.36967e-12
pio	pio-RC	0.505067	6.48926e-12
pita	pita-RA	0.890867	6.59388e-12
noc	noc-RA	1.2044	6.89716e-12
lola	lola-RQ	0.537533	7.15652e-12
CG3776	CG3776-RB	2.36877	8.07602e-12
noc	noc-RB	1.184	8.54267e-12
CG43164	CG43164-RC	0.775633	8.72675e-12
CG43164	CG43164-RA	0.774833	8.7791e-12
CG43164	CG43164-RB	0.774833	8.7791e-12
CG43164	CG43164-RE	0.774833	8.7791e-12
mod(mdg4)	mod(mdg4)-RAB	0.390833	8.85726e-12
sty	sty-RB	0.433833	9.56656e-12
csw	csw-RA	0.4226	1.02666e-11
DOR	DOR-RG	0.391033	1.05211e-11
CG42666	CG42666-RA	0.686433	1.08968e-11
DOR	DOR-RD	0.382033	1.10463e-11
CG3777	CG3777-RD	0.519533	1.23694e-11
peb	peb-RA	0.813467	1.29608e-11
vfl	vfl-RD	0.516733	1.3151e-11
CG12581	CG12581-RA	0.593167	1.36189e-11
CG43394	CG43394-RA	0.694433	1.44882e-11
verm	verm-RH	0.929933	1.61746e-11
verm	verm-RI	0.929933	1.61746e-11
verm	verm-RG	0.929933	1.61746e-11
mdy	mdy-RE	0.445967	1.70394e-11
pio	pio-RE	0.5042	1.89978e-11
fru	fru-RM	0.3828	2.02158e-11
Traf4	Traf4-RA	0.5421	2.78708e-11
CG16820	CG16820-RA	0.8684	3.15885e-11
TFAM	TFAM-RB	1.6514	3.18161e-11
Pino	Pino-RA	0.783367	3.22109e-11
Pino	Pino-RC	0.783367	3.22109e-11
Irk1	Irk1-RE	0.457267	3.55828e-11
Gs2	Gs2-RC	0.800567	3.63626e-11
CG5346	CG5346-RA	0.603467	3.72726e-11
Inx3	Inx3-RC	0.811	3.79304e-11
Lmpt	Lmpt-RF	0.4446	3.95221e-11
Lmpt	Lmpt-RC	0.4446	3.95221e-11
CG43394	CG43394-RE	0.7198	3.96036e-11
CG2765	CG2765-RF	0.8359	4.01897e-11
ogre	ogre-RC	0.502467	4.38519e-11
CG6231	CG6231-RE	0.522133	4.6638e-11
ATPsynC	ATPsynC-RB	1.33303	4.69646e-11
Gs2	Gs2-RA	0.7719	5.02087e-11
Gs2	Gs2-RE	0.7719	5.02087e-11
Gs2	Gs2-RF	0.7719	5.02087e-11
Inx3	Inx3-RA	0.790933	5.34952e-11
CLIP-190	CLIP-190-RQ	0.437867	5.58558e-11
sea	sea-RD	0.6769	5.60875e-11
fabp	fabp-RC	0.6769	5.60875e-11
Tab2	Tab2-RC	0.381767	5.81479e-11
18w	18w-RA	0.778633	6.12405e-11
Msr-110	Msr-110-RC	0.634267	6.44645e-11
CG17672	CG17672-RA	0.6068	6.55918e-11
Hsp83	Hsp83-RA	1.0542	6.63887e-11
Gpdh	Gpdh-RA	0.974067	7.05409e-11
CAH1	CAH1-RA	0.727467	7.12416e-11
Hsp83	Hsp83-RB	1.00593	7.36929e-11
CG3776	CG3776-RA	2.31867	7.50587e-11
CG3776	CG3776-RC	2.31867	7.50587e-11
Gpdh	Gpdh-RE	0.957633	8.20193e-11
spin	spin-RA	0.426433	8.26555e-11
ttk	ttk-RD	0.6233	8.39592e-11
Trx-2	Trx-2-RA	1.61283	8.70735e-11
CG13676	CG13676-RA	0.5859	8.84371e-11
CG13676	CG13676-RB	0.5859	8.84371e-11
spin	spin-RE	0.419233	9.09326e-11
spin	spin-RD	0.419233	9.09326e-11
spin	spin-RC	0.419233	9.09326e-11
spin	spin-RB	0.419233	9.09326e-11
CG9281	CG9281-RD	1.09437	9.25651e-11
Treh	Treh-RG	0.413	9.54601e-11
Tab2	Tab2-RA	0.391167	9.77261e-11
mab-21	mab-21-RA	1.09647	9.95991e-11
Hsc70-4	Hsc70-4-RA	0.9278	1.06321e-10
CG4313	CG4313-RC	0.4602	1.26734e-10
CG4313	CG4313-RE	0.4602	1.26734e-10
CG11825	CG11825-RC	1.13197	1.27586e-10
CG11170	CG11170-RB	0.7554	1.27895e-10
CG11170	CG11170-RC	0.7554	1.27895e-10
CG9281	CG9281-RB	0.966967	1.33705e-10
Idgf4	Idgf4-RA	1.41197	1.34571e-10
Idgf4	Idgf4-RB	1.41197	1.34571e-10
CG3609	CG3609-RA	1.29997	1.39544e-10
drm	drm-RB	0.4377	1.45413e-10
CG8483	CG8483-RA	0.681133	1.48123e-10
RhoGAP18B	RhoGAP18B-RD	0.556267	1.48879e-10
Picot	Picot-RA	0.418167	1.49425e-10
Picot	Picot-RD	0.418167	1.49425e-10
Pfrx	Pfrx-RF	0.470567	1.60338e-10
CG32103	CG32103-RB	0.396167	1.70899e-10
CG15706	CG15706-RA	0.641867	1.75802e-10
CG15706	CG15706-RD	0.641867	1.75802e-10
mlt	mlt-RB	1.21353	1.79458e-10
TFAM	TFAM-RA	1.59893	1.84429e-10
PCB	PCB-RD	0.528033	1.92902e-10
PCB	PCB-RA	0.528033	1.92902e-10
PCB	PCB-RJ	0.528033	1.92902e-10
PCB	PCB-RM	0.528033	1.92902e-10
ptr	ptr-RD	0.394333	2.00323e-10
ptr	ptr-RF	0.399767	2.00468e-10
CG15706	CG15706-RF	0.6405	2.07527e-10
CG13024	CG13024-RC	0.384033	2.1787e-10
Lmpt	Lmpt-RO	0.445967	2.31343e-10
CG5854	CG5854-RA	1.4506	2.42428e-10
CG13891	CG13891-RA	2.51427	2.42653e-10
CG9422	CG9422-RD	0.4703	2.50319e-10
CG15611	CG15611-RB	0.716633	2.51465e-10
CG15611	CG15611-RA	0.716633	2.51465e-10
Pen	Pen-RA	0.978033	2.66984e-10
CG17078	CG17078-RE	1.07607	2.77669e-10
mtd	mtd-RA	0.392467	2.80954e-10
Gclm	Gclm-RB	1.89397	3.02042e-10
Map205	Map205-RA	0.418233	3.15496e-10
mlt	mlt-RC	1.20117	3.16369e-10
spi	spi-RE	0.686267	3.17865e-10
spi	spi-RB	0.686267	3.17865e-10
Bacc	Bacc-RD	0.624933	3.47617e-10
CG43897	CG43897-RE	0.4198	3.51733e-10
CG43897	CG43897-RA	0.4198	3.51733e-10
CG43897	CG43897-RN	0.4198	3.51733e-10
Map205	Map205-RB	0.405133	3.7474e-10
kay	kay-RF	0.728967	3.75613e-10
CG4096	CG4096-RB	0.6535	4.02254e-10
Idgf4	Idgf4-RC	1.27183	4.27109e-10
chic	chic-RD	0.437067	4.6051e-10
Sam-S	Sam-S-RE	0.559033	4.87217e-10
daw	daw-RB	0.546933	5.09573e-10
Vrp1	Vrp1-RD	0.5059	5.17648e-10
Vrp1	Vrp1-RC	0.5059	5.17648e-10
Vrp1	Vrp1-RK	0.5059	5.17648e-10
Gdh	Gdh-RF	0.5679	5.38604e-10
Gdh	Gdh-RA	0.5679	5.38604e-10
dpp	dpp-RC	0.5443	5.40363e-10
ci	ci-RB	0.544733	5.50969e-10
CG14879	CG14879-RA	1.14073	5.7329e-10
CG14879	CG14879-RB	1.14073	5.7329e-10
CG3552	CG3552-RD	1.02253	5.77543e-10
CG6231	CG6231-RB	0.516967	5.78505e-10
Dcp-1	Dcp-1-RA	1.50003	6.08367e-10
Vrp1	Vrp1-RI	0.4311	6.43346e-10
ATPsynC	ATPsynC-RF	1.31597	6.44609e-10
RpL10Ab	RpL10Ab-RA	1.84387	6.67216e-10
RpL10Ab	RpL10Ab-RF	1.84387	6.67216e-10
CG31523	CG31523-RG	0.684033	6.8418e-10
CG9801	CG9801-RB	0.386633	7.0052e-10
CG13377	CG13377-RB	1.00447	7.08605e-10
CG13377	CG13377-RA	1.00447	7.17309e-10
CG6145	CG6145-RA	0.420867	7.40939e-10
CG42237	CG42237-RB	0.682	7.45237e-10
CG42237	CG42237-RA	0.682	7.45237e-10
daw	daw-RC	0.521967	7.54726e-10
obst-A	obst-A-RB	1.20037	7.56295e-10
Strn-Mlck	Strn-Mlck-RJ	0.6852	7.72337e-10
Past1	Past1-RA	0.621867	7.98615e-10
betaTub56D	betaTub56D-RB	0.952733	8.05363e-10
dpp	dpp-RB	0.5007	8.09488e-10
klar	klar-RC	0.520867	8.7727e-10
CG13624	CG13624-RG	0.380767	8.79801e-10
CG31710	CG31710-RD	0.814567	8.89331e-10
Past1	Past1-RB	0.596967	9.25376e-10
CG6145	CG6145-RE	0.397967	9.75475e-10
Map205	Map205-RC	0.378933	9.7799e-10
Hsp23	Hsp23-RB	1.9085	1.00212e-09
fwd	fwd-RB	0.399567	1.04275e-09
fwd	fwd-RD	0.399567	1.04275e-09
Diap1	Diap1-RC	0.9086	1.23565e-09
Dp1	Dp1-RD	0.5645	1.24774e-09
Dp1	Dp1-RA	0.5645	1.24774e-09
CG6398	CG6398-RB	0.597767	1.29886e-09
Sox14	Sox14-RB	0.749167	1.33492e-09
CG32280	CG32280-RA	0.7766	1.36508e-09
CG32280	CG32280-RB	0.7766	1.36508e-09
CG32280	CG32280-RD	0.7766	1.36508e-09
glec	glec-RA	0.700333	1.37048e-09
Dp1	Dp1-RB	0.541167	1.39173e-09
Hsc70-4	Hsc70-4-RG	0.887333	1.42115e-09
CG2292	CG2292-RA	0.9625	1.43965e-09
CG14879	CG14879-RC	1.01673	1.46838e-09
CG14879	CG14879-RD	1.01673	1.46838e-09
Pgd	Pgd-RB	1.1592	1.51134e-09
CG43164	CG43164-RD	0.7548	1.53008e-09
slgA	slgA-RJ	0.416367	1.53041e-09
CG6398	CG6398-RA	0.601533	1.5867e-09
Eno	Eno-RE	0.653267	1.64695e-09
Pgd	Pgd-RA	1.09663	1.65813e-09
CG31743	CG31743-RA	0.547767	1.66108e-09
CG34313	CG34313-RA	0.547767	1.66108e-09
wdp	wdp-RA	0.382167	1.66302e-09
Eno	Eno-RB	0.675033	1.72897e-09
CG1607	CG1607-RA	0.396	1.82567e-09
CG1607	CG1607-RD	0.396	1.82567e-09
eIF-4a	eIF-4a-RE	0.910233	1.86976e-09
scramb2	scramb2-RA	1.0468	1.91862e-09
CG6145	CG6145-RC	0.469	1.93324e-09
PCB	PCB-RI	0.494533	2.00257e-09
PCB	PCB-RE	0.494533	2.00257e-09
CG4096	CG4096-RC	0.6612	2.06055e-09
vri	vri-RD	0.647367	2.08655e-09
ATPsynC	ATPsynC-RG	1.2796	2.10374e-09
Clic	Clic-RA	0.472067	2.12476e-09
Sox14	Sox14-RA	0.684467	2.1575e-09
ZnT63C	ZnT63C-RE	0.698033	2.2862e-09
Ack-like	Ack-like-RC	0.506367	2.30146e-09
CG30280	CG30280-RB	1.75473	2.37509e-09
CG7702	CG7702-RA	0.7193	2.38836e-09
CG7702	CG7702-RB	0.7193	2.38836e-09
FER	FER-RC	0.5143	2.42496e-09
CG7530	CG7530-RA	0.5288	2.6829e-09
CG7530	CG7530-RB	0.5288	2.6829e-09
l(3)02640	l(3)02640-RA	0.695267	2.83575e-09
Hsp23	Hsp23-RA	1.87973	3.057e-09
Ef1alpha48D	Ef1alpha48D-RC	0.787467	3.12229e-09
Irk1	Irk1-RB	0.4508	3.18322e-09
v	v-RA	2.47177	3.37684e-09
wgn	wgn-RA	0.504767	3.56491e-09
wgn	wgn-RB	0.504767	3.56491e-09
Toll-7	Toll-7-RA	0.657367	3.66515e-09
Bacc	Bacc-RC	0.577467	3.82186e-09
CG32280	CG32280-RC	0.743733	3.85034e-09
Crc	Crc-RB	1.3479	3.86706e-09
spi	spi-RG	0.4353	3.9873e-09
pyx	pyx-RA	0.724	4.01516e-09
CG11790	CG11790-RA	1.30737	4.11325e-09
CG11790	CG11790-RB	1.30737	4.11325e-09
CG11790	CG11790-RC	1.30737	4.11325e-09
sni	sni-RA	1.3972	4.2828e-09
CG8740	CG8740-RA	0.4159	4.35468e-09
CG4115	CG4115-RA	0.890233	4.53425e-09
fbl	fbl-RB	0.4873	4.79087e-09
eIF-4a	eIF-4a-RA	0.952233	4.81169e-09
Vha100-2	Vha100-2-RB	0.394533	4.92119e-09
Pi3K21B	Pi3K21B-RB	0.547967	5.07996e-09
Crc	Crc-RA	1.3885	5.112e-09
Drat	Drat-RA	0.5932	5.18325e-09
eIF-4a	eIF-4a-RC	0.952233	5.19129e-09
CG42336	CG42336-RB	0.978333	5.38914e-09
CG42336	CG42336-RF	0.978333	5.38914e-09
stg	stg-RB	1.01373	5.42589e-09
vri	vri-RA	0.595133	5.59282e-09
obst-A	obst-A-RA	0.9758	5.75383e-09
CG17337	CG17337-RA	1.278	6.10997e-09
CG14478	CG14478-RA	0.442933	6.14543e-09
Rcd6	Rcd6-RA	0.617567	6.26959e-09
Rcd6	Rcd6-RB	0.617567	6.26959e-09
Ack-like	Ack-like-RE	0.428267	6.47294e-09
vri	vri-RF	0.5718	6.72213e-09
Neos	Neos-RA	1.5315	6.77667e-09
CG14478	CG14478-RD	0.434967	6.87091e-09
Spn55B	Spn55B-RA	1.3036	6.95781e-09
Pi3K21B	Pi3K21B-RE	0.4933	6.97264e-09
mlt	mlt-RA	1.23013	7.02499e-09
CG11275	CG11275-RA	1.0493	7.58021e-09
CG1882	CG1882-RG	0.9131	8.23623e-09
Dp1	Dp1-RF	0.533533	8.30524e-09
neo	neo-RA	0.623633	8.50281e-09
neo	neo-RB	0.623633	8.50281e-09
CG30080	CG30080-RA	0.951433	8.56031e-09
CG30080	CG30080-RC	0.951433	8.56031e-09
CG42662	CG42662-RB	0.951433	8.56031e-09
CG42662	CG42662-RC	0.951433	8.56031e-09
Trip1	Trip1-RA	1.38763	8.6974e-09
CG5835	CG5835-RA	0.6774	8.75292e-09
Vha16-1	Vha16-1-RA	0.496633	8.7993e-09
Pak3	Pak3-RA	0.4871	8.9351e-09
Clic	Clic-RC	0.478167	9.26253e-09
CG9821	CG9821-RC	0.619267	9.26438e-09
RpL3	RpL3-RD	1.8633	9.54686e-09
CG5191	CG5191-RA	0.398433	9.85366e-09
CG5191	CG5191-RB	0.398433	9.85366e-09
CG5191	CG5191-RD	0.398433	9.85366e-09
CG5191	CG5191-RE	0.398433	9.85366e-09
CG3902	CG3902-RA	0.695433	1.0116e-08
Desat1	Desat1-RC	0.6177	1.01521e-08
CG42560	CG42560-RB	2.22257	1.04335e-08
CG17834	CG17834-RE	0.554233	1.06561e-08
Hsc70-4	Hsc70-4-RE	0.878867	1.08099e-08
Hsc70-4	Hsc70-4-RC	0.878867	1.08099e-08
GstD1	GstD1-RA	1.43097	1.10068e-08
GstD1	GstD1-RB	1.43097	1.10068e-08
Inx2	Inx2-RA	1.0146	1.10088e-08
serp	serp-RB	0.528167	1.11696e-08
CG5191	CG5191-RF	0.3984	1.12518e-08
CG9338	CG9338-RB	0.9912	1.1401e-08
CG15822	CG15822-RD	0.3855	1.14397e-08
CG15822	CG15822-RE	0.3855	1.14397e-08
CG15822	CG15822-RF	0.3855	1.14397e-08
CG15822	CG15822-RG	0.3855	1.14397e-08
l(2)k09913	l(2)k09913-RB	0.626367	1.19108e-08
l(2)k09913	l(2)k09913-RF	0.626367	1.19108e-08
l(2)k09913	l(2)k09913-RG	0.626367	1.19108e-08
CG44286	CG44286-RD	1.15993	1.24507e-08
CG8788	CG8788-RA	1.15993	1.24507e-08
Hsc70-4	Hsc70-4-RD	0.8882	1.26124e-08
slgA	slgA-RF	0.398933	1.30224e-08
slgA	slgA-RH	0.398933	1.30224e-08
slgA	slgA-RD	0.398933	1.30224e-08
slgA	slgA-RE	0.398933	1.30224e-08
slgA	slgA-RB	0.398933	1.30224e-08
slgA	slgA-RI	0.398933	1.30224e-08
2005-09-01	Sep5-RB	1.28807	1.33294e-08
Gclm	Gclm-RA	1.8056	1.35469e-08
ci	ci-RA	0.545967	1.46666e-08
ci	ci-RC	0.545967	1.46666e-08
E(spl)m2-BFM	E(spl)m2-BFM-RA	1.62977	1.48789e-08
awd	awd-RE	1.99267	1.49341e-08
Fkbp14	Fkbp14-RC	0.403967	1.52665e-08
Tina-1	Tina-1-RB	1.65547	1.54209e-08
Vha16-1	Vha16-1-RC	0.525633	1.54292e-08
Vha16-1	Vha16-1-RD	0.525633	1.54292e-08
Vha16-1	Vha16-1-RB	0.525633	1.54292e-08
Pak3	Pak3-RD	0.4044	1.57775e-08
Pak3	Pak3-RC	0.4044	1.57775e-08
kdn	kdn-RB	0.434	1.60183e-08
Eno	Eno-RC	0.6849	1.60897e-08
Eno	Eno-RD	0.6849	1.60897e-08
CG6950	CG6950-RD	1.27407	1.66369e-08
drm	drm-RA	0.391067	1.67173e-08
drm	drm-RC	0.391067	1.67173e-08
FER	FER-RD	0.7275	1.67363e-08
CG7530	CG7530-RC	0.5083	1.7019e-08
CG5853	CG5853-RC	0.456267	1.71604e-08
l(1)G0320	l(1)G0320-RB	1.07847	1.73678e-08
Gp93	Gp93-RA	0.894867	1.74424e-08
NitFhit	NitFhit-RA	1.51457	1.80713e-08
emp	emp-RD	0.8237	1.85436e-08
Xrp1	Xrp1-RD	0.991	1.8765e-08
CG6950	CG6950-RA	1.21747	1.92323e-08
awd	awd-RC	1.91857	1.97179e-08
l(2)k09913	l(2)k09913-RA	0.619567	2.00336e-08
l(2)k09913	l(2)k09913-RC	0.619567	2.00336e-08
Inx2	Inx2-RB	0.897533	2.00528e-08
Inx2	Inx2-RD	0.897533	2.00528e-08
Desat1	Desat1-RA	0.5046	2.01583e-08
awd	awd-RD	1.84977	2.03564e-08
cdc14	cdc14-RA	0.468533	2.08165e-08
cdc14	cdc14-RB	0.468533	2.08165e-08
cdc14	cdc14-RC	0.468533	2.08165e-08
CG1888	CG1888-RB	0.9001	2.09161e-08
CG1888	CG1888-RD	0.9001	2.09161e-08
CG11791	CG11791-RB	0.722333	2.14759e-08
CG11791	CG11791-RD	0.722333	2.14759e-08
ade3	ade3-RB	0.567133	2.21862e-08
cdc14	cdc14-RD	0.434367	2.27047e-08
sea	sea-RA	0.8246	2.362e-08
sea	sea-RE	0.8246	2.362e-08
2005-09-01	Sep5-RA	1.295	2.36566e-08
Pfrx	Pfrx-RA	0.4132	2.37042e-08
Pfrx	Pfrx-RI	0.4132	2.37042e-08
Pfrx	Pfrx-RJ	0.4132	2.37042e-08
CG6950	CG6950-RC	1.1802	2.37316e-08
CG5853	CG5853-RA	0.452467	2.43682e-08
CG5853	CG5853-RB	0.452467	2.43682e-08
Adf1	Adf1-RA	0.7118	2.47287e-08
Adf1	Adf1-RE	0.7118	2.47287e-08
Adf1	Adf1-RB	0.7118	2.50382e-08
Adf1	Adf1-RC	0.7118	2.50382e-08
cdc14	cdc14-RE	0.5331	2.51425e-08
Asciz	Asciz-RB	0.984633	2.58113e-08
sni	sni-RB	1.0815	2.59435e-08
Dp1	Dp1-RE	0.5036	2.59547e-08
alphaTub84B	alphaTub84B-RA	1.3134	2.62099e-08
CG15881	CG15881-RB	1.07113	2.67289e-08
ced-6	ced-6-RD	0.385067	2.70566e-08
Treh	Treh-RD	0.388333	2.72678e-08
Treh	Treh-RA	0.388933	2.74651e-08
jigr1	jigr1-RE	0.4321	2.82046e-08
Ef1alpha48D	Ef1alpha48D-RA	0.884267	2.85875e-08
imd	imd-RB	0.847167	2.926e-08
Tcp-1eta	Tcp-1eta-RA	0.5567	2.93355e-08
su(s)	su(s)-RA	0.4681	3.02968e-08
su(s)	su(s)-RB	0.4681	3.02968e-08
CG9338	CG9338-RA	1.0604	3.03359e-08
Rab2	Rab2-RB	1.1289	3.1652e-08
mthl9	mthl9-RA	1.0643	3.36028e-08
RpL23	RpL23-RA	1.3836	3.37221e-08
ttk	ttk-RH	0.462333	3.40022e-08
drd	drd-RA	0.4923	3.55062e-08
CG31710	CG31710-RA	0.750933	3.61667e-08
Zip99C	Zip99C-RF	0.588033	3.62272e-08
Zip99C	Zip99C-RI	0.588033	3.62272e-08
Zip99C	Zip99C-RJ	0.588033	3.62272e-08
CG3829	CG3829-RA	0.732833	3.7346e-08
Adam	Adam-RA	1.14173	3.94981e-08
slgA	slgA-RA	0.419133	4.02777e-08
CG15317	CG15317-RA	1.71533	4.14297e-08
IP3K1	IP3K1-RA	0.701733	4.15186e-08
ATPCL	ATPCL-RD	0.417133	4.25107e-08
chic	chic-RF	0.4116	4.28438e-08
ytr	ytr-RB	0.722567	4.57363e-08
Act42A	Act42A-RA	1.27837	4.65986e-08
l(2)34Fc	l(2)34Fc-RA	0.925733	4.67214e-08
Pdk1	Pdk1-RG	0.953467	5.00448e-08
RpS27A	RpS27A-RA	1.1053	5.01032e-08
CG32579	CG32579-RC	1.27963	5.11218e-08
Adam	Adam-RB	1.19713	5.15005e-08
Jheh3	Jheh3-RA	1.16847	5.21101e-08
CG11454	CG11454-RA	1.57357	5.2383e-08
jigr1	jigr1-RA	0.431633	5.30347e-08
jigr1	jigr1-RB	0.431633	5.30347e-08
jigr1	jigr1-RD	0.431633	5.30347e-08
Atg18b	Atg18b-RA	0.453467	5.56538e-08
chic	chic-RB	0.406733	5.59553e-08
chic	chic-RC	0.387533	5.96065e-08
Atg18b	Atg18b-RB	0.4329	6.26829e-08
cwo	cwo-RA	0.402133	6.41268e-08
cwo	cwo-RB	0.402133	6.41268e-08
cwo	cwo-RC	0.402133	6.41268e-08
CG10924	CG10924-RA	0.4627	6.54116e-08
Strn-Mlck	Strn-Mlck-RB	0.479867	6.71592e-08
ems	ems-RA	1.03043	6.74706e-08
E(spl)m7-HLH	E(spl)m7-HLH-RA	1.51983	6.75278e-08
Tango11	Tango11-RA	0.9616	7.13458e-08
Ef1alpha48D	Ef1alpha48D-RE	0.686933	7.27768e-08
serp	serp-RC	0.534033	7.33904e-08
l(2)34Fc	l(2)34Fc-RB	0.873967	7.39362e-08
l(2)k09913	l(2)k09913-RE	0.627333	7.42414e-08
obst-B	obst-B-RA	0.403567	7.51363e-08
Neos	Neos-RB	1.5018	7.61789e-08
slif	slif-RB	0.545233	7.96204e-08
ND-B14.5A	ND-B14.5A-RA	1.78553	7.99498e-08
RpS3A	RpS3A-RA	1.64437	8.22135e-08
RpS3A	RpS3A-RB	1.64437	8.22135e-08
ATPCL	ATPCL-RE	0.398867	8.24986e-08
Tina-1	Tina-1-RA	1.4108	8.36849e-08
CG12009	CG12009-RB	0.594167	8.43995e-08
CG5885	CG5885-RA	1.5824	8.48219e-08
CG6950	CG6950-RB	1.23737	8.49888e-08
CG32091	CG32091-RB	0.441767	9.05368e-08
Ef1alpha48D	Ef1alpha48D-RD	1.30813	9.16176e-08
Pcd	Pcd-RA	1.40593	9.34941e-08
CG31301	CG31301-RA	1.14557	9.37589e-08
CG9107	CG9107-RA	1.25077	9.48395e-08
mthl5	mthl5-RA	0.7361	9.53358e-08
mthl5	mthl5-RB	0.7361	9.53358e-08
Rab2	Rab2-RA	0.868733	9.78027e-08
Dic1	Dic1-RB	0.6009	9.80785e-08
CG1667	CG1667-RC	0.805867	9.98972e-08
CG5397	CG5397-RA	1.17093	1.04105e-07
CG13183	CG13183-RA	0.413367	1.08475e-07
Vha26	Vha26-RC	0.6419	1.13206e-07
Act5C	Act5C-RE	0.7811	1.13953e-07
Pdi	Pdi-RE	0.635933	1.14662e-07
Karybeta3	Karybeta3-RA	0.495033	1.18457e-07
mmy	mmy-RD	0.477233	1.19066e-07
vvl	vvl-RA	0.749533	1.19302e-07
vvl	vvl-RC	0.749533	1.19302e-07
vvl	vvl-RE	0.749533	1.19302e-07
vvl	vvl-RF	0.749533	1.19302e-07
odd	odd-RA	0.919067	1.19428e-07
Amun	Amun-RK	0.742333	1.19513e-07
CG31955	CG31955-RD	1.4936	1.19831e-07
Surf4	Surf4-RA	0.8197	1.20976e-07
slgA	slgA-RK	0.382	1.25087e-07
Sema-1b	Sema-1b-RB	0.4018	1.27216e-07
CycB	CycB-RA	0.674733	1.30243e-07
CycB	CycB-RE	0.674733	1.30243e-07
CG9948	CG9948-RB	1.32047	1.33604e-07
CG8188	CG8188-RD	0.828167	1.33781e-07
EF2	EF2-RD	0.873333	1.34497e-07
l(3)04053	l(3)04053-RA	0.761167	1.40268e-07
stumps	stumps-RD	0.504667	1.40697e-07
shf	shf-RA	0.527233	1.41319e-07
shf	shf-RB	0.527233	1.41319e-07
shf	shf-RC	0.527233	1.41319e-07
shf	shf-RD	0.527233	1.41319e-07
Sema-1b	Sema-1b-RA	0.384833	1.44417e-07
GstS1	GstS1-RC	0.631667	1.46557e-07
GstS1	GstS1-RD	0.5726	1.47571e-07
LamC	LamC-RA	0.574367	1.48313e-07
LamC	LamC-RB	0.574367	1.48313e-07
ND-39	ND-39-RA	0.501833	1.49089e-07
CG9864	CG9864-RA	0.594433	1.49959e-07
Gadd34	Gadd34-RA	1.08903	1.50096e-07
vvl	vvl-RD	0.690067	1.51041e-07
Strn-Mlck	Strn-Mlck-RM	0.4917	1.55702e-07
Strn-Mlck	Strn-Mlck-RN	0.4917	1.55702e-07
Trp1	Trp1-RD	0.802233	1.59664e-07
aru	aru-RD	0.4416	1.60222e-07
Bacc	Bacc-RB	0.6451	1.6057e-07
RpL19	RpL19-RA	1.28157	1.60678e-07
Rpn6	Rpn6-RA	0.8657	1.642e-07
cav	cav-RE	1.01343	1.68778e-07
cav	cav-RD	1.01343	1.68778e-07
CG16947	CG16947-RB	0.462533	1.71498e-07
Ipk2	Ipk2-RA	1.35947	1.72113e-07
CG9864	CG9864-RB	0.534067	1.73617e-07
Diap1	Diap1-RD	1.20833	1.7392e-07
CG30280	CG30280-RC	1.60523	1.75736e-07
CG8369	CG8369-RA	1.70407	1.76035e-07
CG8369	CG8369-RB	1.70407	1.76035e-07
CG8369	CG8369-RC	1.70407	1.76035e-07
pot	pot-RA	0.4712	1.77726e-07
Myd88	Myd88-RA	0.682167	1.80299e-07
CG11825	CG11825-RD	1.2823	1.82376e-07
su(s)	su(s)-RC	0.469067	1.90807e-07
Sox14	Sox14-RC	0.582133	1.95637e-07
RpS24	RpS24-RA	1.58137	2.01455e-07
moody	moody-RB	0.5825	2.03733e-07
moody	moody-RD	0.5825	2.03733e-07
EF2	EF2-RC	0.911067	2.07043e-07
kdn	kdn-RA	0.458767	2.0804e-07
CG12279	CG12279-RA	1.6023	2.09722e-07
Chd64	Chd64-RC	1.17213	2.10536e-07
CG8654	CG8654-RC	0.543833	2.10711e-07
CG44286	CG44286-RC	1.1044	2.10943e-07
CG8788	CG8788-RC	1.1044	2.10943e-07
eIF-4a	eIF-4a-RF	0.920967	2.16283e-07
slgA	slgA-RG	0.398533	2.22626e-07
slgA	slgA-RN	0.398533	2.22626e-07
Sam-S	Sam-S-RB	0.483733	2.24676e-07
NTPase	NTPase-RD	0.526567	2.2625e-07
CG5731	CG5731-RA	0.766767	2.28066e-07
Sam-S	Sam-S-RG	0.6162	2.29158e-07
Npc2b	Npc2b-RB	0.8722	2.32088e-07
CG9336	CG9336-RA	1.3447	2.38058e-07
CG17337	CG17337-RC	1.20037	2.40567e-07
Sam-S	Sam-S-RA	0.467967	2.40725e-07
Sam-S	Sam-S-RL	0.467967	2.40725e-07
Spec2	Spec2-RA	0.480933	2.43957e-07
velo	velo-RB	0.663833	2.48937e-07
CG4914	CG4914-RA	0.782633	2.4917e-07
CG9372	CG9372-RA	1.05427	2.49841e-07
CG16989	CG16989-RB	0.869	2.49897e-07
VhaM9.7-b	VhaM9.7-b-RA	1.41137	2.55549e-07
Rho1	Rho1-RA	0.8931	2.58133e-07
eIF-4a	eIF-4a-RD	0.9452	2.60396e-07
mmy	mmy-RA	0.484433	2.60798e-07
CG9821	CG9821-RA	0.828533	2.60861e-07
Wsck	Wsck-RA	0.768033	2.64976e-07
CG1628	CG1628-RB	0.717067	2.669e-07
CG6231	CG6231-RF	0.409233	2.74574e-07
Moe	Moe-RL	0.5222	2.80811e-07
CG5986	CG5986-RB	2.10143	2.82151e-07
CG10527	CG10527-RA	0.849633	2.88983e-07
Mpp6	Mpp6-RA	1.15073	2.91951e-07
CG5397	CG5397-RB	0.869333	2.96108e-07
slgA	slgA-RL	0.426533	2.96512e-07
Myd88	Myd88-RB	0.592433	2.9774e-07
EF2	EF2-RA	0.9074	2.9784e-07
CG8051	CG8051-RB	0.720533	3.01645e-07
CG31955	CG31955-RA	1.66963	3.11726e-07
CG31955	CG31955-RB	1.66963	3.11726e-07
CG14817	CG14817-RB	1.59917	3.12037e-07
cpb	cpb-RA	0.9426	3.12767e-07
Hnf4	Hnf4-RF	0.5152	3.14886e-07
CG17272	CG17272-RA	1.45763	3.19441e-07
eIF-4a	eIF-4a-RB	0.9633	3.21334e-07
CG17078	CG17078-RB	0.968533	3.25798e-07
CG17078	CG17078-RC	0.968533	3.25798e-07
CG17078	CG17078-RD	0.968533	3.25798e-07
mthl1	mthl1-RA	0.403633	3.29095e-07
E(spl)m3-HLH	E(spl)m3-HLH-RA	1.3912	3.30115e-07
NTPase	NTPase-RE	0.5359	3.32013e-07
NTPase	NTPase-RF	0.5359	3.32013e-07
stg	stg-RA	0.785867	3.32707e-07
CG15922	CG15922-RB	2.01323	3.37923e-07
Moe	Moe-RA	0.8402	3.41859e-07
CG8331	CG8331-RB	1.1796	3.42821e-07
fd68A	fd68A-RK	0.4427	3.47047e-07
fd68A	fd68A-RN	0.4427	3.47047e-07
fd68A	fd68A-RO	0.4427	3.47047e-07
fd68A	fd68A-RG	0.447767	3.53968e-07
fd68A	fd68A-RP	0.447767	3.53968e-07
cav	cav-RA	1.0413	3.66725e-07
CG8654	CG8654-RD	0.539533	3.72416e-07
mmy	mmy-RB	0.649833	3.88045e-07
poly	poly-RA	0.5307	3.90229e-07
sktl	sktl-RC	0.395833	3.96364e-07
RpS20	RpS20-RA	1.54103	3.99593e-07
Tudor-SN	Tudor-SN-RB	0.6868	4.15147e-07
polo	polo-RA	0.583833	4.30689e-07
ogre	ogre-RD	0.415433	4.33371e-07
ogre	ogre-RF	0.415433	4.33371e-07
DnaJ-1	DnaJ-1-RB	1.20797	4.4393e-07
DnaJ-1	DnaJ-1-RA	1.20797	4.4393e-07
Tango11	Tango11-RC	1.4299	4.45737e-07
CG8654	CG8654-RA	0.7513	4.47508e-07
fd68A	fd68A-RJ	0.464833	4.48197e-07
Kaz1-ORFB	Kaz1-ORFB-RE	1.44847	4.49941e-07
Tudor-SN	Tudor-SN-RA	0.702267	4.55631e-07
Atg5	Atg5-RA	0.447133	4.55896e-07
CG15861	CG15861-RB	1.1293	4.58896e-07
velo	velo-RD	0.6695	4.69574e-07
Kaz1-ORFB	Kaz1-ORFB-RF	1.4512	4.7136e-07
CG3609	CG3609-RC	1.15967	4.73067e-07
bs	bs-RB	0.431033	4.8576e-07
esg	esg-RA	0.953567	4.88979e-07
CG44242	CG44242-RA	1.7076	4.99565e-07
CG44242	CG44242-RB	1.7076	4.99565e-07
Gyk	Gyk-RA	0.7907	5.00981e-07
Amun	Amun-RB	0.686767	5.13692e-07
Gyk	Gyk-RB	0.7986	5.14301e-07
Cct5	Cct5-RA	0.9773	5.20663e-07
CG32103	CG32103-RC	0.579733	5.25041e-07
Myd88	Myd88-RC	0.66	5.45777e-07
CG3732	CG3732-RA	1.1294	5.58422e-07
Drat	Drat-RB	0.6809	5.60662e-07
koi	koi-RD	0.683333	5.65765e-07
CG31710	CG31710-RC	1.0996	5.68401e-07
Sam-S	Sam-S-RI	0.4615	5.68482e-07
Sam-S	Sam-S-RJ	0.4615	5.68482e-07
Tango11	Tango11-RB	0.907333	5.71399e-07
crq	crq-RA	0.6235	5.75363e-07
crq	crq-RE	0.6235	5.75363e-07
vfl	vfl-RB	0.6974	5.75675e-07
vfl	vfl-RA	0.6974	5.75675e-07
vfl	vfl-RF	0.6974	5.75675e-07
Amun	Amun-RA	0.725267	5.81364e-07
Dip1	Dip1-RA	1.62587	5.95811e-07
Dip1	Dip1-RB	1.62587	5.95811e-07
RpL8	RpL8-RA	1.1993	5.97654e-07
RpL8	RpL8-RB	1.1993	5.97654e-07
Sam-S	Sam-S-RH	0.4651	6.021e-07
CG3262	CG3262-RE	0.5317	6.02399e-07
CG42662	CG42662-RA	1.74517	6.18954e-07
Sam-S	Sam-S-RF	0.4571	6.20216e-07
CG2211	CG2211-RA	0.932267	6.3377e-07
put	put-RA	0.473667	6.40232e-07
put	put-RB	0.473667	6.40232e-07
Sam-S	Sam-S-RD	0.449633	6.40853e-07
Sam-S	Sam-S-RC	0.449633	6.40853e-07
Prosbeta1	Prosbeta1-RA	1.38093	6.52332e-07
Amun	Amun-RF	0.791667	6.53908e-07
foi	foi-RB	0.532567	6.5867e-07
Vamp7	Vamp7-RA	1.11077	6.60011e-07
Vamp7	Vamp7-RC	1.11077	6.60011e-07
CG33080	CG33080-RC	0.4582	6.60968e-07
PGRP-LF	PGRP-LF-RA	0.967267	6.70022e-07
Flo1	Flo1-RA	0.7091	6.71873e-07
Flo1	Flo1-RB	0.7091	6.71873e-07
Amun	Amun-RJ	0.774567	6.75443e-07
CG6746	CG6746-RA	1.32017	6.92037e-07
Pdk1	Pdk1-RE	0.584133	7.02102e-07
Atg13	Atg13-RA	0.7733	7.08186e-07
Amun	Amun-RD	0.7343	7.08304e-07
Amun	Amun-RH	0.7343	7.08304e-07
Amun	Amun-RI	0.7343	7.08304e-07
Phk-3	Phk-3-RB	1.01723	7.09148e-07
GstE9	GstE9-RA	1.46243	7.12377e-07
Tollo	Tollo-RA	0.5206	7.16084e-07
CG11073	CG11073-RA	0.410367	7.1764e-07
CG11073	CG11073-RC	0.410367	7.1764e-07
CG11073	CG11073-RB	0.410367	7.1764e-07
CG11073	CG11073-RD	0.410367	7.1764e-07
CG11073	CG11073-RE	0.410367	7.1764e-07
CG2991	CG2991-RC	0.474367	7.38588e-07
CG5167	CG5167-RA	1.16667	7.45781e-07
CG8051	CG8051-RA	0.485467	7.59461e-07
Drat	Drat-RD	0.485867	7.61166e-07
vfl	vfl-RG	0.7112	7.71143e-07
CG1882	CG1882-RA	1.00937	7.75108e-07
CG1882	CG1882-RC	1.00937	7.75108e-07
CG1882	CG1882-RD	1.00937	7.75108e-07
CG32579	CG32579-RA	1.3783	7.88612e-07
CG32579	CG32579-RB	1.3783	7.88612e-07
dbr	dbr-RC	0.683433	8.00716e-07
dbr	dbr-RE	0.683433	8.00716e-07
Kaz1-ORFB	Kaz1-ORFB-RA	1.69073	8.00958e-07
Kaz1-ORFB	Kaz1-ORFB-RH	1.69073	8.00958e-07
Sc2	Sc2-RA	1.01433	8.08996e-07
CG9821	CG9821-RB	0.609	8.63414e-07
CG9821	CG9821-RD	0.609	8.63414e-07
eIF-4E	eIF-4E-RF	0.856633	8.64187e-07
l(3)05822	l(3)05822-RA	0.396133	8.6485e-07
Amun	Amun-RL	0.809733	8.65327e-07
CG44325	CG44325-RA	0.5192	8.77093e-07
His3.3B	His3.3B-RC	1.06413	8.78156e-07
GstE12	GstE12-RA	1.56367	8.78681e-07
GstE12	GstE12-RB	1.56367	8.78681e-07
cv	cv-RA	0.8134	9.00558e-07
cv	cv-RC	0.8783	9.15225e-07
dbr	dbr-RB	0.635333	9.26269e-07
dbr	dbr-RD	0.635333	9.26269e-07
CG32708	CG32708-RA	1.40423	9.27435e-07
Rm62	Rm62-RF	0.388667	9.55247e-07
Muted	Muted-RB	1.07803	9.67623e-07
CG7071	CG7071-RC	1.07803	9.67623e-07
Karybeta3	Karybeta3-RB	0.443633	9.84769e-07
Rack1	Rack1-RC	0.9045	9.87486e-07
26-29-p	26-29-p-RA	1.0482	9.88827e-07
CG5509	CG5509-RA	1.4562	9.92853e-07
GstE12	GstE12-RC	1.56367	1.00067e-06
CG14207	CG14207-RD	0.4554	1.008e-06
Srp72	Srp72-RA	0.900667	1.01321e-06
Gk	Gk-RA	0.588933	1.01436e-06
Moe	Moe-RK	0.5629	1.01875e-06
hoip	hoip-RB	1.82137	1.03511e-06
CG6891	CG6891-RA	0.460067	1.06542e-06
Amun	Amun-RC	0.700433	1.08207e-06
Amun	Amun-RE	0.700433	1.08207e-06
Amun	Amun-RG	0.700433	1.08207e-06
CG9782	CG9782-RA	0.5723	1.10228e-06
CG13640	CG13640-RA	1.79873	1.11313e-06
CG2765	CG2765-RE	0.757267	1.15582e-06
dbr	dbr-RF	0.574667	1.1613e-06
CG10311	CG10311-RA	0.381633	1.17071e-06
hpo	hpo-RA	0.9579	1.17183e-06
put	put-RC	0.3806	1.18344e-06
CG33774	CG33774-RA	1.6659	1.19617e-06
CG11388	CG11388-RA	1.07787	1.20452e-06
CG8331	CG8331-RD	0.8694	1.22126e-06
CG3437	CG3437-RB	1.18477	1.24841e-06
CG9336	CG9336-RB	1.16337	1.26319e-06
Drat	Drat-RC	0.677	1.26913e-06
CG4928	CG4928-RC	0.4003	1.28164e-06
CG11438	CG11438-RB	0.875833	1.28973e-06
Eip55E	Eip55E-RA	1.32813	1.29836e-06
Hnf4	Hnf4-RB	0.589167	1.30531e-06
CG14207	CG14207-RA	0.466333	1.30574e-06
CG14207	CG14207-RB	0.466333	1.30574e-06
His3.3B	His3.3B-RB	1.22877	1.31728e-06
slgA	slgA-RM	0.421233	1.31781e-06
CG30159	CG30159-RB	1.37763	1.32291e-06
hoip	hoip-RA	1.82137	1.35493e-06
by	by-RD	0.500867	1.36891e-06
E(spl)mbeta-HLH	E(spl)mbeta-HLH-RA	1.5544	1.3813e-06
Desat1	Desat1-RD	0.687033	1.43788e-06
RpL36A	RpL36A-RA	1.8293	1.45581e-06
CG5151	CG5151-RC	0.534	1.45676e-06
CG32152	CG32152-RB	0.534	1.45676e-06
E2f2	E2f2-RB	0.786467	1.48385e-06
eIF-4E	eIF-4E-RE	0.755833	1.48605e-06
Eip55E	Eip55E-RB	1.25683	1.49884e-06
Atg3	Atg3-RA	0.9354	1.51066e-06
CG7600	CG7600-RA	0.587267	1.52428e-06
CG33080	CG33080-RB	0.553433	1.52547e-06
CG33080	CG33080-RD	0.553433	1.52547e-06
by	by-RA	0.487833	1.5405e-06
by	by-RC	0.487833	1.5405e-06
cag	cag-RA	1.1033	1.55761e-06
Max	Max-RC	1.07773	1.56301e-06
betaTub56D	betaTub56D-RA	1.04313	1.57679e-06
Cyp301a1	Cyp301a1-RA	0.7993	1.5953e-06
CG7102	CG7102-RB	0.489533	1.60861e-06
CG10365	CG10365-RB	0.603333	1.60972e-06
CG11523	CG11523-RA	1.30967	1.61538e-06
eIF-4E	eIF-4E-RA	0.734233	1.64151e-06
eIF-4E	eIF-4E-RG	0.734233	1.64151e-06
eIF-4E	eIF-4E-RH	0.734233	1.64151e-06
Bka	Bka-RA	1.75417	1.64199e-06
ND-ACP	ND-ACP-RB	0.966133	1.64387e-06
ND-ACP	ND-ACP-RC	0.966133	1.64387e-06
aru	aru-RC	0.413133	1.64443e-06
Pex5	Pex5-RA	0.8982	1.67305e-06
CG9107	CG9107-RB	1.16983	1.67401e-06
blot	blot-RA	0.4638	1.69266e-06
Trxr-1	Trxr-1-RA	0.544933	1.69969e-06
CG14997	CG14997-RA	1.07793	1.70271e-06
CG43326	CG43326-RA	1.61263	1.72824e-06
ND-ACP	ND-ACP-RA	0.935067	1.7352e-06
hpo	hpo-RB	0.840833	1.74904e-06
CG12730	CG12730-RA	1.32723	1.7542e-06
CG8331	CG8331-RA	0.865167	1.75731e-06
CG44532	CG44532-RA	1.3985	1.76748e-06
CG9948	CG9948-RC	1.39877	1.7841e-06
CG7102	CG7102-RA	0.496967	1.80175e-06
GXIVsPLA2	GXIVsPLA2-RD	0.954467	1.80444e-06
RpL19	RpL19-RB	1.48007	1.82719e-06
CG9855	CG9855-RA	1.10117	1.83259e-06
CG5986	CG5986-RA	1.45133	1.8472e-06
Pdk	Pdk-RB	0.3922	1.87208e-06
Pdk	Pdk-RD	0.3922	1.87208e-06
CG16989	CG16989-RA	0.803033	1.87724e-06
CG30159	CG30159-RA	1.31987	1.87837e-06
CG30159	CG30159-RC	1.31987	1.87837e-06
CG10863	CG10863-RA	1.15197	1.89511e-06
CG15482	CG15482-RA	1.37423	1.89536e-06
RpL36A	RpL36A-RB	1.70707	1.89612e-06
CG7841	CG7841-RA	0.645333	1.93602e-06
Rho1	Rho1-RD	0.944233	1.94325e-06
CG5734	CG5734-RA	0.758033	1.96216e-06
Pgk	Pgk-RC	0.488833	1.96999e-06
eIF-4E	eIF-4E-RB	0.678967	1.97712e-06
eIF-4E	eIF-4E-RC	0.678967	1.97712e-06
eIF-4E	eIF-4E-RD	0.678967	1.97712e-06
eIF-4E	eIF-4E-RI	0.678967	1.97712e-06
Desat1	Desat1-RE	0.579067	1.98786e-06
Spn27A	Spn27A-RB	0.788467	2.00419e-06
colt	colt-RA	1.06207	2.00457e-06
Moe	Moe-RB	0.601033	2.01364e-06
CG5151	CG5151-RF	0.4971	2.06618e-06
CG32152	CG32152-RC	0.4971	2.06618e-06
bond	bond-RB	0.475233	2.06768e-06
Desat1	Desat1-RB	0.622233	2.09783e-06
Tre1	Tre1-RA	0.4753	2.09964e-06
Tre1	Tre1-RC	0.4753	2.09964e-06
RhoL	RhoL-RA	0.507533	2.10301e-06
RpL32	RpL32-RB	1.5045	2.11922e-06
Trp1	Trp1-RA	0.556533	2.14281e-06
Tsf1	Tsf1-RC	0.8616	2.14536e-06
Gp150	Gp150-RD	0.3996	2.20133e-06
fabp	fabp-RA	0.6635	2.20615e-06
fabp	fabp-RB	0.6635	2.20615e-06
RpS3A	RpS3A-RF	0.9423	2.22125e-06
cer	cer-RA	1.48497	2.22362e-06
mRpS25	mRpS25-RA	1.82737	2.2283e-06
Rpn9	Rpn9-RB	0.8913	2.22922e-06
CG44325	CG44325-RD	0.388767	2.24908e-06
dnk	dnk-RB	0.8202	2.25733e-06
Pdk1	Pdk1-RB	0.565967	2.29179e-06
CG7272	CG7272-RA	0.696933	2.31276e-06
colt	colt-RD	1.06207	2.32661e-06
mRpL2	mRpL2-RA	1.19333	2.33487e-06
pst	pst-RE	0.816433	2.33869e-06
Mpp6	Mpp6-RB	1.40853	2.34397e-06
pst	pst-RF	0.816033	2.35019e-06
pst	pst-RG	0.816033	2.35019e-06
scu	scu-RA	1.2454	2.35402e-06
scu	scu-RB	1.2454	2.35402e-06
CG13896	CG13896-RA	1.40553	2.388e-06
CG8038	CG8038-RA	1.28007	2.42147e-06
CG5390	CG5390-RA	0.968967	2.46424e-06
l(1)G0320	l(1)G0320-RA	1.0648	2.47594e-06
CG7841	CG7841-RB	0.598133	2.50236e-06
Tctp	Tctp-RA	1.17073	2.5152e-06
CG13896	CG13896-RC	1.4029	2.58263e-06
CG13896	CG13896-RB	1.4029	2.58263e-06
CG14817	CG14817-RA	1.6228	2.66068e-06
crq	crq-RB	0.624633	2.66645e-06
CG4199	CG4199-RA	0.7555	2.67633e-06
RpS29	RpS29-RA	1.1423	2.6775e-06
Max	Max-RA	0.999067	2.71711e-06
galectin	galectin-RD	0.484267	2.72466e-06
CG4585	CG4585-RA	0.778467	2.7385e-06
CG5390	CG5390-RB	0.968967	2.75781e-06
arm	arm-RE	0.3786	2.80986e-06
arm	arm-RF	0.3786	2.80986e-06
Mtp	Mtp-RA	0.525133	2.81552e-06
CG7810	CG7810-RA	1.09803	2.82664e-06
CG13067	CG13067-RA	1.52763	2.94099e-06
RpL18A	RpL18A-RA	1.3639	2.94863e-06
CG14997	CG14997-RB	1.01763	2.96124e-06
Max	Max-RD	0.926233	3.02758e-06
CG4797	CG4797-RB	0.4881	3.04664e-06
CycB	CycB-RB	0.597133	3.04901e-06
CG1927	CG1927-RB	0.915333	3.09488e-06
CG33170	CG33170-RA	0.8639	3.10978e-06
pAbp	pAbp-RA	0.498267	3.12981e-06
nrv2	nrv2-RD	0.436433	3.13793e-06
nrv2	nrv2-RA	0.436433	3.13793e-06
nrv2	nrv2-RE	0.436433	3.13793e-06
RpL18	RpL18-RA	1.44297	3.15089e-06
tal-1A	tal-1A-RB	1.13903	3.19557e-06
tal-2A	tal-2A-RA	1.13903	3.19557e-06
tal-3A	tal-3A-RA	1.13903	3.19557e-06
tal-AA	tal-AA-RA	1.13903	3.19557e-06
CG32815	CG32815-RC	0.434567	3.23466e-06
TSG101	TSG101-RA	0.867967	3.2511e-06
CG34163	CG34163-RA	2.03613	3.31983e-06
CG34163	CG34163-RB	2.03613	3.31983e-06
RpL4	RpL4-RA	0.7628	3.33758e-06
CG43345	CG43345-RB	0.7127	3.38558e-06
CG43346	CG43346-RA	0.7127	3.38558e-06
CG17028	CG17028-RA	0.915533	3.39288e-06
CG7675	CG7675-RA	0.651433	3.40451e-06
CG7675	CG7675-RB	0.651433	3.40451e-06
CG7675	CG7675-RC	0.651433	3.40451e-06
CG7675	CG7675-RD	0.651433	3.40451e-06
CG5989	CG5989-RA	1.02403	3.41649e-06
CG5989	CG5989-RB	1.02403	3.41649e-06
CG5989	CG5989-RC	1.02403	3.41649e-06
RpL32	RpL32-RC	1.47767	3.42809e-06
CG42559	CG42559-RA	1.06663	3.44619e-06
CG42559	CG42559-RB	1.06663	3.44619e-06
CG42559	CG42559-RC	1.06663	3.44619e-06
CG42560	CG42560-RA	1.06663	3.44619e-06
CG2076	CG2076-RB	0.9415	3.45505e-06
ND-B12	ND-B12-RB	1.47577	3.46782e-06
ND-B12	ND-B12-RE	1.47577	3.46782e-06
l(2)SH0834	l(2)SH0834-RA	1.0917	3.47439e-06
CG10433	CG10433-RC	0.907467	3.50479e-06
CG17600	CG17600-RB	1.0577	3.63063e-06
CG17600	CG17600-RC	1.0577	3.63063e-06
Myb	Myb-RD	0.825433	3.71396e-06
Prosalpha3	Prosalpha3-RA	1.19407	3.73864e-06
CG30287	CG30287-RA	1.3703	3.7714e-06
CG4199	CG4199-RB	0.606167	3.84267e-06
CG31743	CG31743-RB	0.429833	3.88586e-06
Myb	Myb-RA	0.825433	3.93747e-06
Myb	Myb-RB	0.825433	3.93747e-06
Myb	Myb-RE	0.825433	3.93747e-06
CG13877	CG13877-RB	1.49837	4.01724e-06
Faf	Faf-RA	0.662767	4.02529e-06
Cpr49Ag	Cpr49Ag-RA	1.42943	4.07199e-06
CG34116	CG34116-RA	1.19603	4.08618e-06
Sclp	Sclp-RB	1.48723	4.10376e-06
VhaM9.7-b	VhaM9.7-b-RB	0.969433	4.17329e-06
aop	aop-RD	0.6135	4.17995e-06
CG5919	CG5919-RA	1.05563	4.26168e-06
CG8420	CG8420-RB	0.412467	4.27208e-06
GstO2	GstO2-RA	0.940333	4.29798e-06
Faf	Faf-RB	0.6118	4.30187e-06
CG4199	CG4199-RD	0.5978	4.32832e-06
CG14767	CG14767-RB	0.420033	4.33797e-06
CG44252	CG44252-RE	0.472633	4.36487e-06
CG44252	CG44252-RD	0.472633	4.36487e-06
CG2915	CG2915-RB	0.897033	4.36809e-06
CG2915	CG2915-RA	0.897033	4.36809e-06
CG34250	CG34250-RB	1.19407	4.40488e-06
CG14767	CG14767-RA	0.400267	4.40789e-06
CG14767	CG14767-RC	0.400267	4.40789e-06
E2f2	E2f2-RA	0.7967	4.44411e-06
CG1299	CG1299-RA	0.5304	4.48401e-06
CG1299	CG1299-RB	0.5304	4.48401e-06
bond	bond-RC	0.8731	4.53248e-06
CG30269	CG30269-RB	0.9036	4.59496e-06
CG30273	CG30273-RB	0.9036	4.59496e-06
ND-B12	ND-B12-RC	1.47577	4.59887e-06
ND-B12	ND-B12-RD	1.47577	4.59887e-06
CG8920	CG8920-RD	0.394467	4.73155e-06
CG9837	CG9837-RD	0.548067	4.74765e-06
mRpS14	mRpS14-RB	1.42113	4.74987e-06
CG32815	CG32815-RD	0.3941	4.76838e-06
mRpS14	mRpS14-RA	1.9095	4.77279e-06
CG9117	CG9117-RA	1.52277	4.80263e-06
CG1640	CG1640-RB	0.402833	4.82205e-06
CG43345	CG43345-RC	0.6498	4.84291e-06
CG43346	CG43346-RC	0.6498	4.84291e-06
aop	aop-RA	0.5891	4.86245e-06
FKBP59	FKBP59-RA	0.819367	4.87986e-06
ND-B14.5A	ND-B14.5A-RB	1.19433	4.88297e-06
CG3777	CG3777-RA	0.4715	4.88914e-06
CG3777	CG3777-RC	0.4715	4.88914e-06
CG3777	CG3777-RE	0.4715	4.88914e-06
CG7071	CG7071-RB	1.10433	4.93336e-06
CG10399	CG10399-RB	0.995567	4.96054e-06
Muted	Muted-RA	1.10433	4.9819e-06
CG7071	CG7071-RA	1.10433	4.9819e-06
FKBP59	FKBP59-RB	0.790067	5.06275e-06
CG12107	CG12107-RA	1.2481	5.07823e-06
CG4199	CG4199-RC	0.573867	5.07981e-06
Rack1	Rack1-RD	0.890133	5.08981e-06
CG1896	CG1896-RA	1.2452	5.12499e-06
ytr	ytr-RA	0.681267	5.12622e-06
CG9855	CG9855-RC	0.970433	5.12864e-06
pAbp	pAbp-RC	0.393967	5.2883e-06
CG10399	CG10399-RA	1.0085	5.29974e-06
CG2736	CG2736-RA	0.931067	5.44605e-06
Top3beta	Top3beta-RA	0.656233	5.49821e-06
CG42697	CG42697-RA	1.12603	5.54221e-06
CG31673	CG31673-RB	0.9438	5.57884e-06
Cys	Cys-RA	1.6687	5.59771e-06
RpL6	RpL6-RA	0.976067	5.61918e-06
RpL6	RpL6-RB	0.976067	5.61918e-06
CG44325	CG44325-RC	0.465	5.64085e-06
RfC4	RfC4-RA	1.06687	5.79321e-06
Pdi	Pdi-RA	0.534933	5.8066e-06
CG17549	CG17549-RB	0.7935	5.80779e-06
CG17549	CG17549-RC	0.7935	5.80779e-06
CG17549	CG17549-RD	0.7935	5.80779e-06
Ip259	Ip259-RA	1.07783	5.8629e-06
Smn	Smn-RA	1.431	5.86394e-06
GstO2	GstO2-RB	1.2334	5.86843e-06
CG14646	CG14646-RB	0.8541	5.87456e-06
PrBP	PrBP-RA	1.1929	5.89594e-06
CG4194	CG4194-RA	1.30087	5.95598e-06
Ip259	Ip259-RB	1.07783	6.03427e-06
eIF3-S9	eIF3-S9-RB	0.720167	6.04698e-06
Act5C	Act5C-RB	0.759067	6.061e-06
CG34303	CG34303-RA	1.36023	6.22063e-06
Atg7	Atg7-RB	0.477267	6.24142e-06
Atg7	Atg7-RA	0.477267	6.24142e-06
CG18731	CG18731-RA	1.45357	6.24357e-06
CG18731	CG18731-RB	1.45357	6.24357e-06
PI31	PI31-RD	0.692	6.28353e-06
His3.3B	His3.3B-RA	0.747867	6.28922e-06
ImpL2	ImpL2-RD	0.626733	6.32195e-06
ogre	ogre-RA	0.449067	6.43008e-06
CG43886	CG43886-RA	2.20983	6.4854e-06
Pdcd4	Pdcd4-RB	0.386933	6.49791e-06
Pdcd4	Pdcd4-RC	0.386933	6.49791e-06
Pdcd4	Pdcd4-RD	0.386933	6.49791e-06
COX6AL	COX6AL-RA	1.37637	6.4985e-06
GstO1	GstO1-RA	0.966333	6.51837e-06
stumps	stumps-RF	0.467033	6.53337e-06
DNApol-alpha50	DNApol-alpha50-RA	0.459033	6.56124e-06
pyx	pyx-RB	0.698433	6.56589e-06
CG11370	CG11370-RA	1.0865	6.59221e-06
CG11370	CG11370-RB	1.0865	6.59221e-06
Pdcd4	Pdcd4-RA	0.418233	6.652e-06
CG1640	CG1640-RC	0.406233	6.655e-06
CG1640	CG1640-RD	0.406233	6.655e-06
CG1640	CG1640-RE	0.406233	6.655e-06
CG1640	CG1640-RA	0.406233	6.655e-06
CG1640	CG1640-RF	0.406233	6.655e-06
aft	aft-RA	0.837	6.71507e-06
CG31673	CG31673-RA	0.978367	6.74672e-06
BCL7-like	BCL7-like-RA	0.822667	6.76391e-06
bond	bond-RA	0.682533	6.7654e-06
CG15673	CG15673-RC	0.4572	6.82537e-06
Kal1	Kal1-RA	0.390133	6.89557e-06
CG3770	CG3770-RA	1.0297	6.90378e-06
Cortactin	Cortactin-RC	0.6008	6.9107e-06
Cortactin	Cortactin-RD	0.6008	6.9107e-06
qjt	qjt-RA	1.1351	6.92754e-06
CG43675	CG43675-RC	0.7836	6.94665e-06
CG30499	CG30499-RA	1.1297	7.01863e-06
CG17834	CG17834-RB	0.752467	7.01954e-06
CG17834	CG17834-RD	0.752467	7.01954e-06
Cpr12A	Cpr12A-RA	1.06917	7.09106e-06
jigr1	jigr1-RC	0.3981	7.10415e-06
Arpc1	Arpc1-RB	0.802267	7.11177e-06
Arpc1	Arpc1-RA	0.802267	7.11177e-06
QC	QC-RA	0.793133	7.14226e-06
CG4199	CG4199-RI	0.518567	7.15119e-06
CG30345	CG30345-RB	0.571933	7.19646e-06
CG9948	CG9948-RA	1.3013	7.30555e-06
CycH	CycH-RA	0.9007	7.40137e-06
RpL18	RpL18-RB	1.39317	7.4774e-06
CG31689	CG31689-RE	0.4638	7.51692e-06
CG31689	CG31689-RG	0.4638	7.51692e-06
CG31955	CG31955-RC	1.17467	7.55971e-06
CG43325	CG43325-RA	1.0427	7.59413e-06
CG43326	CG43326-RB	1.0427	7.59413e-06
CG15601	CG15601-RB	1.0624	7.5955e-06
h	h-RB	0.566033	7.6005e-06
Top3beta	Top3beta-RB	0.604767	7.82271e-06
CG13204	CG13204-RB	0.891867	8.10313e-06
ade5	ade5-RA	0.7765	8.18873e-06
RpL32	RpL32-RD	1.47217	8.30691e-06
CG12016	CG12016-RA	0.678967	8.50449e-06
CG42456	CG42456-RA	0.678967	8.50449e-06
p38c	p38c-RA	1.02103	8.52976e-06
CG1673	CG1673-RA	0.501767	8.55061e-06
RpL32	RpL32-RA	1.43803	8.59114e-06
bou	bou-RA	1.70747	8.71258e-06
Vha26	Vha26-RA	0.597833	8.71883e-06
Vha26	Vha26-RB	0.597833	8.71883e-06
RpL10	RpL10-RC	0.8493	8.83337e-06
RpL10	RpL10-RD	0.8493	8.83337e-06
fd68A	fd68A-RH	0.4154	9.0101e-06
Fic	Fic-RA	0.806067	9.0264e-06
CG12730	CG12730-RB	0.9233	9.09093e-06
CG33155	CG33155-RA	1.271	9.09237e-06
CG33155	CG33155-RD	1.271	9.09237e-06
cin	cin-RA	0.758667	9.14504e-06
Sld5	Sld5-RA	1.48747	9.1853e-06
Rho1	Rho1-RG	0.8636	9.20808e-06
CG31523	CG31523-RD	0.5504	9.24072e-06
CG33170	CG33170-RC	0.668933	9.25163e-06
Debcl	Debcl-RA	0.4561	9.31045e-06
CG11982	CG11982-RA	1.0286	9.31565e-06
Fibp	Fibp-RE	0.794267	9.36583e-06
Vps4	Vps4-RB	0.8101	9.43024e-06
Nap1	Nap1-RC	1.09977	9.4435e-06
CG4729	CG4729-RA	0.454367	9.44362e-06
CG8420	CG8420-RA	0.450433	9.51946e-06
h	h-RA	0.5603	9.52524e-06
CG10365	CG10365-RA	0.572967	9.54926e-06
CG7675	CG7675-RE	0.596667	9.5649e-06
ogre	ogre-RB	0.483833	9.58921e-06
CG6845	CG6845-RC	1.18633	9.83572e-06
CG6845	CG6845-RD	1.18633	9.83572e-06
CG6845	CG6845-RE	1.18633	9.83572e-06
Rho1	Rho1-RB	0.795733	9.84079e-06
Rho1	Rho1-RC	0.795733	9.84079e-06
Rho1	Rho1-RF	0.795733	9.84079e-06
CG8066	CG8066-RB	1.1353	9.84748e-06
Act5C	Act5C-RA	0.821533	9.99419e-06
CG8399	CG8399-RA	0.438633	1.00516e-05
CG8399	CG8399-RB	0.438633	1.00516e-05
koi	koi-RF	0.680067	1.00797e-05
CG2641	CG2641-RA	0.6358	1.03725e-05
slim	slim-RC	0.544767	1.04136e-05
Smn	Smn-RB	1.22563	1.04317e-05
CG5742	CG5742-RB	0.571967	1.06415e-05
cin	cin-RB	0.758667	1.06453e-05
Abp1	Abp1-RA	0.618767	1.07518e-05
Pfrx	Pfrx-RH	0.5452	1.07747e-05
Pfrx	Pfrx-RD	0.5452	1.07747e-05
Rpn6	Rpn6-RB	0.823	1.08433e-05
Rpn6	Rpn6-RC	0.823	1.08433e-05
Gapdh2	Gapdh2-RA	1.25743	1.10015e-05
CG4199	CG4199-RH	0.462033	1.10381e-05
ND-ASHI	ND-ASHI-RA	0.9082	1.11018e-05
Nap1	Nap1-RB	1.02127	1.11093e-05
Cct5	Cct5-RB	0.800367	1.11321e-05
CG17829	CG17829-RA	0.957033	1.11465e-05
CG17829	CG17829-RC	0.957033	1.11465e-05
CG17829	CG17829-RB	0.957033	1.11465e-05
CG12290	CG12290-RA	0.6004	1.12593e-05
CG1827	CG1827-RD	1.17933	1.12753e-05
CG12262	CG12262-RA	0.734	1.13022e-05
TwdlBeta	TwdlBeta-RA	1.51403	1.13041e-05
GXIVsPLA2	GXIVsPLA2-RA	0.920967	1.13114e-05
GXIVsPLA2	GXIVsPLA2-RC	0.920967	1.13114e-05
CG6785	CG6785-RA	0.556833	1.13267e-05
aay	aay-RA	0.7974	1.135e-05
Tom7	Tom7-RB	1.3438	1.13627e-05
CG11396	CG11396-RA	1.01863	1.14073e-05
CG13877	CG13877-RC	1.45953	1.14617e-05
CG12393	CG12393-RA	0.811567	1.14706e-05
pot	pot-RC	0.4258	1.15529e-05
pot	pot-RB	0.4258	1.15529e-05
qjt	qjt-RB	1.13647	1.15579e-05
CG17028	CG17028-RB	0.920733	1.15989e-05
GNBP2	GNBP2-RB	0.714467	1.16312e-05
GNBP2	GNBP2-RA	0.714467	1.16312e-05
GNBP2	GNBP2-RD	0.714467	1.16312e-05
CG14646	CG14646-RA	0.776267	1.16315e-05
Cpr97Eb	Cpr97Eb-RA	1.06907	1.16702e-05
CG15706	CG15706-RE	0.5697	1.18078e-05
Ssu72	Ssu72-RA	0.798433	1.18389e-05
Ssu72	Ssu72-RB	0.798433	1.18389e-05
ogre	ogre-RE	0.726167	1.18473e-05
CG4199	CG4199-RG	0.457267	1.19354e-05
slim	slim-RA	0.498833	1.20917e-05
zuc	zuc-RA	1.0109	1.21095e-05
CG13204	CG13204-RA	0.568067	1.26337e-05
CG5946	CG5946-RD	0.3869	1.2641e-05
CG5946	CG5946-RG	0.3869	1.2641e-05
Ugt58Fa	Ugt58Fa-RA	0.9843	1.27938e-05
COX7AL	COX7AL-RA	1.3166	1.28215e-05
Ugt58Fa	Ugt58Fa-RB	0.950933	1.30009e-05
asparagine-synthetase	asparagine-synthetase-RA	0.9631	1.30686e-05
Rbsn-5	Rbsn-5-RA	0.744067	1.30889e-05
RpII15	RpII15-RC	0.928	1.31935e-05
CG7192	CG7192-RA	0.6292	1.33993e-05
CG1882	CG1882-RF	0.889433	1.34762e-05
rtet	rtet-RA	0.7156	1.34905e-05
CG6424	CG6424-RC	0.379467	1.35138e-05
CG30281	CG30281-RA	1.1372	1.37143e-05
CG2862	CG2862-RC	1.35627	1.38414e-05
nito	nito-RB	0.4093	1.38902e-05
His3.3B	His3.3B-RE	0.6255	1.39776e-05
yip2	yip2-RA	0.8608	1.39794e-05
CG11529	CG11529-RA	1.1115	1.41732e-05
Aldh-III	Aldh-III-RO	0.394967	1.41934e-05
Aldh-III	Aldh-III-RQ	0.394967	1.41934e-05
Act5C	Act5C-RD	0.755467	1.42086e-05
CG5642	CG5642-RA	0.577067	1.42393e-05
CG3308	CG3308-RA	0.5598	1.44486e-05
CG15881	CG15881-RA	1.03537	1.45026e-05
CG15881	CG15881-RC	1.03537	1.45026e-05
CG2909	CG2909-RA	0.787767	1.4537e-05
lola	lola-RM	0.5449	1.45381e-05
CG9319	CG9319-RA	0.9374	1.46474e-05
pit	pit-RB	0.598533	1.47566e-05
CG44009	CG44009-RB	0.571167	1.4876e-05
2001-09-01	Sep1-RA	0.723467	1.49171e-05
Nek2	Nek2-RA	0.7584	1.49828e-05
Vps29	Vps29-RA	1.32863	1.50145e-05
polo	polo-RB	0.505767	1.52759e-05
brn	brn-RA	1.26837	1.5489e-05
CG2076	CG2076-RA	0.8868	1.55349e-05
MFS16	MFS16-RA	0.504667	1.55722e-05
MFS16	MFS16-RB	0.504667	1.55722e-05
Nap1	Nap1-RA	0.951733	1.5724e-05
GstD9	GstD9-RA	0.887667	1.58119e-05
GstD9	GstD9-RB	0.887667	1.58119e-05
Pex5	Pex5-RB	0.809233	1.59102e-05
CG1628	CG1628-RC	0.653233	1.59107e-05
Ance	Ance-RA	0.5176	1.60016e-05
CG33170	CG33170-RB	0.602033	1.60805e-05
U4-U6-60K	U4-U6-60K-RA	0.891167	1.61397e-05
dbe	dbe-RA	0.8692	1.61527e-05
CG10731	CG10731-RC	1.09983	1.62973e-05
nito	nito-RA	0.635467	1.63447e-05
CG4042	CG4042-RA	1.29197	1.6362e-05
CG2202	CG2202-RA	0.5738	1.63741e-05
CG12393	CG12393-RB	0.746633	1.64281e-05
Aldh-III	Aldh-III-RN	0.415467	1.66159e-05
Aldh-III	Aldh-III-RP	0.415467	1.66159e-05
CHKov2	CHKov2-RA	0.762433	1.67007e-05
CG9319	CG9319-RB	0.918	1.67022e-05
EloC	EloC-RA	0.949	1.68307e-05
EloC	EloC-RB	0.949	1.68307e-05
Gapdh2	Gapdh2-RC	1.2694	1.68326e-05
bigmax	bigmax-RA	1.08497	1.68385e-05
CG43736	CG43736-RD	0.399567	1.72034e-05
Aats-ser	Aats-ser-RB	0.657467	1.72173e-05
wac	wac-RC	1.54003	1.73662e-05
Rab10	Rab10-RA	0.863167	1.73686e-05
Herp	Herp-RC	0.460333	1.73753e-05
Rack1	Rack1-RA	0.866733	1.76271e-05
Rack1	Rack1-RB	0.866733	1.76271e-05
Psf2	Psf2-RC	1.23557	1.78891e-05
CG5174	CG5174-RB	0.7049	1.79579e-05
CG5174	CG5174-RP	0.7049	1.79579e-05
CG5174	CG5174-RO	0.7049	1.79579e-05
CG17754	CG17754-RD	0.598067	1.80647e-05
ImpL2	ImpL2-RB	0.63	1.82439e-05
Rbf	Rbf-RA	0.566767	1.84628e-05
Hsc70-3	Hsc70-3-RC	0.6931	1.87318e-05
ref(2)P	ref(2)P-RB	0.5441	1.89961e-05
Scox	Scox-RA	1.1916	1.90064e-05
cype	cype-RC	1.52227	1.90396e-05
jigr1	jigr1-RG	0.911867	1.9287e-05
Pgk	Pgk-RB	0.472033	1.9417e-05
aru	aru-RA	0.5096	1.94549e-05
CG13223	CG13223-RA	0.8507	1.96633e-05
l(1)G0156	l(1)G0156-RA	0.8755	1.9707e-05
rump	rump-RA	0.379233	1.97125e-05
rump	rump-RB	0.379233	1.97125e-05
l(1)G0156	l(1)G0156-RD	0.8755	1.99639e-05
Tsp42Ef	Tsp42Ef-RA	0.533133	1.99745e-05
CG17754	CG17754-RC	0.537833	2.02209e-05
CG17754	CG17754-RA	0.537833	2.02209e-05
CG17754	CG17754-RF	0.537833	2.02209e-05
Aldh-III	Aldh-III-RI	0.5154	2.02581e-05
Aldh-III	Aldh-III-RK	0.5154	2.02581e-05
Aldh-III	Aldh-III-RL	0.5154	2.02581e-05
Aldh-III	Aldh-III-RS	0.5154	2.02581e-05
Spn28Dc	Spn28Dc-RA	0.7183	2.0268e-05
stv	stv-RB	0.5679	2.11426e-05
stv	stv-RG	0.5679	2.11426e-05
RpS29	RpS29-RB	0.877167	2.11608e-05
ND-ASHI	ND-ASHI-RB	1.237	2.12207e-05
Hex-A	Hex-A-RA	0.788067	2.12777e-05
Hex-A	Hex-A-RB	0.788067	2.12777e-05
stv	stv-RC	0.5679	2.13569e-05
CG10602	CG10602-RF	0.460067	2.14996e-05
ade5	ade5-RB	0.6147	2.17323e-05
CG10176	CG10176-RB	0.7382	2.20329e-05
CG5919	CG5919-RB	1.05813	2.20399e-05
CG16786	CG16786-RC	0.604167	2.20453e-05
Aldh-III	Aldh-III-RE	0.488033	2.20834e-05
Aldh-III	Aldh-III-RM	0.488033	2.20834e-05
Aldh-III	Aldh-III-RR	0.488033	2.20834e-05
Aldh-III	Aldh-III-RU	0.488033	2.20834e-05
Act5C	Act5C-RC	0.6968	2.21043e-05
CG44325	CG44325-RB	0.3962	2.21385e-05
Rpn12	Rpn12-RA	0.986433	2.21967e-05
cpb	cpb-RB	0.681067	2.22093e-05
CG17754	CG17754-RG	0.523267	2.22775e-05
CG8654	CG8654-RB	0.678767	2.24624e-05
CG16786	CG16786-RA	0.606167	2.25311e-05
gk	gk-RB	0.4079	2.27393e-05
mRpL53	mRpL53-RA	1.10343	2.29431e-05
CG33155	CG33155-RC	1.10343	2.29431e-05
Pdk	Pdk-RC	0.3904	2.30161e-05
SF2	SF2-RB	0.603733	2.30925e-05
CG2617	CG2617-RB	1.0989	2.31975e-05
l(1)G0334	l(1)G0334-RC	0.7105	2.35071e-05
Mlc-c	Mlc-c-RA	0.649467	2.36028e-05
Pdk	Pdk-RA	0.4233	2.36497e-05
Moe	Moe-RC	0.717867	2.38041e-05
CG15440	CG15440-RA	0.8977	2.43919e-05
cype	cype-RA	1.50493	2.44762e-05
l(1)G0334	l(1)G0334-RD	0.734733	2.46393e-05
Pgk	Pgk-RE	0.5836	2.47459e-05
CG12096	CG12096-RA	0.792433	2.4752e-05
Tctp	Tctp-RB	0.745	2.50333e-05
CG45050	CG45050-RH	0.489167	2.51969e-05
CG10731	CG10731-RB	1.15037	2.52289e-05
RpL18	RpL18-RC	1.3117	2.53819e-05
CG32512	CG32512-RA	0.624533	2.55043e-05
dnk	dnk-RA	0.811967	2.55602e-05
CG14618	CG14618-RA	1.06103	2.56241e-05
CG32512	CG32512-RD	0.6156	2.57088e-05
CG10576	CG10576-RD	0.509933	2.60471e-05
Nacalpha	Nacalpha-RA	1.02213	2.6157e-05
CG43897	CG43897-RI	0.464633	2.64369e-05
CG43897	CG43897-RO	0.464633	2.64369e-05
CG43897	CG43897-RQ	0.464633	2.64369e-05
CG43897	CG43897-RR	0.464633	2.64369e-05
ATPsyndelta	ATPsyndelta-RA	0.9821	2.65423e-05
CG6753	CG6753-RB	0.708733	2.65581e-05
CG10576	CG10576-RC	0.5203	2.6597e-05
CG33969	CG33969-RA	0.9625	2.67341e-05
CG33969	CG33969-RC	0.9625	2.67341e-05
CG13751	CG13751-RA	1.55077	2.69441e-05
Mgstl	Mgstl-RC	0.901333	2.69675e-05
ref(2)P	ref(2)P-RA	0.553433	2.70976e-05
CG10809	CG10809-RA	0.7643	2.71834e-05
tsl	tsl-RB	0.4405	2.72924e-05
tsl	tsl-RA	0.4405	2.72924e-05
tsl	tsl-RC	0.4405	2.72924e-05
wac	wac-RB	1.4317	2.74372e-05
CG1667	CG1667-RB	0.849233	2.81546e-05
Cortactin	Cortactin-RA	0.5519	2.81565e-05
Cortactin	Cortactin-RB	0.5519	2.81565e-05
CG14968	CG14968-RB	0.4629	2.84768e-05
wap	wap-RB	0.4842	2.89002e-05
wap	wap-RC	0.4842	2.89002e-05
Fibp	Fibp-RB	0.811867	2.90609e-05
Fibp	Fibp-RC	0.811867	2.90609e-05
Fibp	Fibp-RG	0.811867	2.90609e-05
CG17104	CG17104-RB	0.741933	2.91928e-05
klar	klar-RI	0.538567	2.94313e-05
wap	wap-RD	0.4754	2.96366e-05
CG12290	CG12290-RB	0.4101	2.98292e-05
Arpc3A	Arpc3A-RC	1.07183	2.98487e-05
CG42662	CG42662-RD	1.89153	2.99237e-05
MFS16	MFS16-RC	0.4975	3.05868e-05
Rheb	Rheb-RA	1.00977	3.07089e-05
Rheb	Rheb-RB	1.00977	3.07089e-05
CG5188	CG5188-RA	0.976967	3.09819e-05
Rhp	Rhp-RB	0.4877	3.10917e-05
Rhp	Rhp-RA	0.4877	3.10917e-05
HmgD	HmgD-RB	0.752667	3.11453e-05
Clc	Clc-RB	0.8202	3.11997e-05
Peritrophin-A	Peritrophin-A-RC	0.5971	3.14784e-05
GstE8	GstE8-RB	1.01803	3.14861e-05
GalNAc-T1	GalNAc-T1-RA	0.428767	3.15602e-05
CG17219	CG17219-RA	0.967733	3.17926e-05
Peritrophin-A	Peritrophin-A-RA	0.5971	3.1815e-05
Peritrophin-A	Peritrophin-A-RB	0.5971	3.1815e-05
CG12393	CG12393-RD	0.929067	3.18512e-05
CG31728	CG31728-RC	0.409333	3.19711e-05
Ef1beta	Ef1beta-RC	1.16563	3.21207e-05
Rox8	Rox8-RD	0.414233	3.21773e-05
CG12118	CG12118-RA	0.984767	3.22239e-05
CG12118	CG12118-RB	0.984767	3.22239e-05
CG1307	CG1307-RC	1.03793	3.2514e-05
Rcd4	Rcd4-RA	1.05367	3.25422e-05
Cpr49Ac	Cpr49Ac-RC	0.633833	3.28209e-05
Cpr49Ac	Cpr49Ac-RA	0.633833	3.28209e-05
Cpr49Ac	Cpr49Ac-RD	0.633833	3.28209e-05
Cpr49Ac	Cpr49Ac-RE	0.633833	3.28209e-05
Cpr49Ac	Cpr49Ac-RF	0.633833	3.28209e-05
Fibp	Fibp-RF	0.775967	3.29084e-05
CG15914	CG15914-RA	1.03113	3.30868e-05
Got2	Got2-RA	0.5205	3.31715e-05
CG10176	CG10176-RC	0.652533	3.37261e-05
CG18643	CG18643-RB	1.37657	3.3834e-05
CG18643	CG18643-RC	1.37657	3.3834e-05
Pink1	Pink1-RH	0.599567	3.39564e-05
CG8078	CG8078-RA	0.785533	3.41727e-05
GalNAc-T1	GalNAc-T1-RB	0.4359	3.42886e-05
CkIIalpha-i3	CkIIalpha-i3-RC	0.777067	3.47976e-05
Rrp45	Rrp45-RA	0.900833	3.49039e-05
CG2162	CG2162-RA	0.408767	3.52471e-05
CG2162	CG2162-RE	0.408767	3.52471e-05
cib	cib-RD	0.727767	3.52588e-05
ana2	ana2-RA	0.8949	3.53019e-05
ana2	ana2-RB	0.8949	3.53019e-05
Herp	Herp-RA	0.4708	3.57533e-05
eIF3-S9	eIF3-S9-RA	0.650567	3.58638e-05
CG13876	CG13876-RA	0.903733	3.68143e-05
Hsc70-4	Hsc70-4-RB	0.7985	3.69504e-05
CG12009	CG12009-RA	0.4092	3.80929e-05
GstS1	GstS1-RB	0.6082	3.80932e-05
CG33635	CG33635-RA	1.52667	3.83938e-05
Cpr49Ac	Cpr49Ac-RG	0.586	3.84868e-05
CG17734	CG17734-RA	0.663433	3.8566e-05
CG17734	CG17734-RB	0.663433	3.8566e-05
CG17734	CG17734-RC	0.663433	3.8566e-05
RpL10	RpL10-RE	0.7419	3.86918e-05
Hsc70-3	Hsc70-3-RA	0.552767	3.90553e-05
Hsc70-3	Hsc70-3-RD	0.552767	3.90553e-05
Nacalpha	Nacalpha-RC	0.9613	3.91996e-05
l(1)G0334	l(1)G0334-RA	0.726333	3.95508e-05
l(1)G0334	l(1)G0334-RB	0.726333	3.95508e-05
CG3552	CG3552-RA	0.962167	3.95717e-05
CG15098	CG15098-RA	0.985033	4.04161e-05
CG15922	CG15922-RA	1.66953	4.05053e-05
CG1927	CG1927-RA	0.662967	4.05486e-05
nito	nito-RC	0.629333	4.11183e-05
CG15771	CG15771-RA	0.5063	4.15529e-05
Rox8	Rox8-RE	0.5026	4.16462e-05
Gtp-bp	Gtp-bp-RA	0.731733	4.19357e-05
CG2862	CG2862-RA	1.17087	4.19973e-05
CG14968	CG14968-RC	0.5493	4.20512e-05
ArfGAP1	ArfGAP1-RA	0.572267	4.20826e-05
ArfGAP1	ArfGAP1-RB	0.572267	4.20826e-05
Hex-A	Hex-A-RC	0.521133	4.20908e-05
Rcd4	Rcd4-RB	1.05367	4.23667e-05
Dpy-30L1	Dpy-30L1-RA	1.1821	4.29537e-05
UQCR-Q	UQCR-Q-RA	0.931967	4.29557e-05
UQCR-Q	UQCR-Q-RC	0.931967	4.29557e-05
CG18815	CG18815-RA	0.6868	4.29576e-05
CG18815	CG18815-RB	0.6868	4.29576e-05
Arpc3A	Arpc3A-RE	0.874133	4.31921e-05
CG4042	CG4042-RB	0.9637	4.34424e-05
ced-6	ced-6-RB	0.412767	4.36597e-05
ced-6	ced-6-RC	0.412767	4.36597e-05
ced-6	ced-6-RF	0.412767	4.36597e-05
Tsp42Ea	Tsp42Ea-RB	0.434567	4.40346e-05
Tsp42Ea	Tsp42Ea-RC	0.434567	4.40346e-05
CG15771	CG15771-RD	0.491467	4.41534e-05
Lam	Lam-RB	0.605133	4.45985e-05
CG34423	CG34423-RA	1.34367	4.47349e-05
rnh1	rnh1-RA	1.30943	4.50234e-05
rnh1	rnh1-RB	1.30943	4.50234e-05
CG3436	CG3436-RC	1.0814	4.54354e-05
CG7718	CG7718-RA	0.763533	4.56023e-05
Phax	Phax-RA	0.8322	4.56823e-05
Phax	Phax-RB	0.8322	4.56823e-05
CG42678	CG42678-RE	0.4272	4.56977e-05
CG3788	CG3788-RB	0.6849	4.64537e-05
PNUTS	PNUTS-RA	0.552367	4.65013e-05
CG11899	CG11899-RA	0.998467	4.6521e-05
rt	rt-RA	0.392867	4.66752e-05
CG14906	CG14906-RC	0.991933	4.69721e-05
Pdxk	Pdxk-RC	0.740333	4.70544e-05
Nlp	Nlp-RB	0.389867	4.78263e-05
Cyp317a1	Cyp317a1-RB	0.6003	4.78728e-05
CG15771	CG15771-RC	0.5765	4.80359e-05
ATPsyndelta	ATPsyndelta-RB	0.822033	4.8368e-05
Nlp	Nlp-RA	0.3793	4.86096e-05
CG1572	CG1572-RC	0.639267	4.88927e-05
CG10075	CG10075-RA	0.866267	4.92903e-05
slmo	slmo-RE	0.880067	4.93434e-05
cag	cag-RB	0.9167	4.95876e-05
slmo	slmo-RA	0.903067	4.9832e-05
slmo	slmo-RB	0.903067	4.9832e-05
CG5174	CG5174-RJ	0.517133	5.02567e-05
CG5174	CG5174-RA	0.517133	5.02567e-05
CG5174	CG5174-RH	0.517133	5.02567e-05
CG5174	CG5174-RG	0.517133	5.02567e-05
CG5174	CG5174-RM	0.517133	5.02567e-05
CG5174	CG5174-RN	0.517133	5.02567e-05
cype	cype-RB	1.5098	5.02785e-05
Vps4	Vps4-RA	0.730567	5.03579e-05
atl	atl-RB	0.526433	5.0844e-05
ppan	ppan-RA	0.8928	5.10733e-05
CG8188	CG8188-RC	0.626167	5.19613e-05
Mgstl	Mgstl-RB	0.904533	5.21264e-05
CG6565	CG6565-RA	0.599367	5.21335e-05
Rox8	Rox8-RG	0.459267	5.2166e-05
koko	koko-RE	1.01633	5.22101e-05
CG8188	CG8188-RA	0.5923	5.30837e-05
CG1444	CG1444-RA	0.744933	5.31797e-05
Lam	Lam-RC	0.557667	5.36697e-05
epsilonCOP	epsilonCOP-RA	1.0386	5.4471e-05
Rox8	Rox8-RH	0.429667	5.45515e-05
Psf2	Psf2-RB	1.2886	5.51616e-05
CG3353	CG3353-RA	0.7677	5.52136e-05
CG7974	CG7974-RB	0.7848	5.53311e-05
CG13562	CG13562-RA	0.783867	5.55647e-05
CG13562	CG13562-RC	0.783867	5.55647e-05
Hsc70-3	Hsc70-3-RB	0.4752	5.61146e-05
smt3	smt3-RB	0.9321	5.63393e-05
vari	vari-RC	0.3829	5.66668e-05
vari	vari-RF	0.3829	5.66668e-05
CG3792	CG3792-RA	0.9032	5.7133e-05
Bacc	Bacc-RA	0.442967	5.79521e-05
CG18596	CG18596-RA	0.486133	5.80537e-05
CG10809	CG10809-RB	0.6972	5.83349e-05
CG7564	CG7564-RB	0.615233	5.86503e-05
ND-15	ND-15-RA	1.16643	5.87608e-05
ND-15	ND-15-RB	1.16643	5.87608e-05
ND-15	ND-15-RC	1.16643	5.87608e-05
ND-15	ND-15-RD	1.16643	5.87608e-05
ND-15	ND-15-RI	1.16643	5.87608e-05
Hop	Hop-RA	0.7062	5.87627e-05
wac	wac-RD	1.2697	5.88567e-05
CkIIalpha-i3	CkIIalpha-i3-RB	0.77	5.89123e-05
CG13038	CG13038-RA	1.30773	5.89747e-05
l(1)G0156	l(1)G0156-RC	0.697733	6.01323e-05
Mapmodulin	Mapmodulin-RC	0.397333	6.04578e-05
CG30499	CG30499-RB	1.00737	6.07349e-05
Lam	Lam-RA	0.5267	6.10258e-05
RpS11	RpS11-RB	0.759	6.23317e-05
sea	sea-RC	0.7806	6.29315e-05
Nacalpha	Nacalpha-RB	0.8571	6.34048e-05
Tal	Tal-RA	0.883833	6.35075e-05
Rox8	Rox8-RC	0.4036	6.43861e-05
T3dh	T3dh-RA	0.588033	6.48853e-05
CG12848	CG12848-RA	1.32437	6.49528e-05
CG12848	CG12848-RB	1.32437	6.49528e-05
CG6565	CG6565-RB	0.547833	6.50595e-05
thoc7	thoc7-RA	1.09757	6.51278e-05
thoc7	thoc7-RB	1.09757	6.51278e-05
Lam	Lam-RD	0.517133	6.54831e-05
CG6565	CG6565-RC	0.535667	6.56447e-05
CG34179	CG34179-RB	0.648933	6.56869e-05
CG34179	CG34179-RC	0.648933	6.56869e-05
slmo	slmo-RC	0.648933	6.56869e-05
slmo	slmo-RD	0.648933	6.56869e-05
CG10495	CG10495-RA	0.838767	6.57259e-05
PI31	PI31-RA	0.912333	6.59159e-05
PI31	PI31-RF	0.912333	6.59159e-05
CG14777	CG14777-RF	0.681167	6.59957e-05
RpII15	RpII15-RA	1.15367	6.61462e-05
RpII15	RpII15-RB	1.15367	6.61462e-05
HmgD	HmgD-RA	0.5854	6.67035e-05
CG6272	CG6272-RA	1.12317	6.68523e-05
or	or-RA	0.879667	6.70955e-05
cnc	cnc-RG	0.450333	6.71599e-05
Ref1	Ref1-RA	0.523	6.73952e-05
CG17549	CG17549-RA	0.717033	6.766e-05
CG17549	CG17549-RE	0.717033	6.766e-05
CG10576	CG10576-RA	0.518433	6.76954e-05
Rox8	Rox8-RB	0.3976	6.77088e-05
Hsc70-4	Hsc70-4-RF	0.785567	6.80691e-05
CG34125	CG34125-RA	1.11827	6.83862e-05
Rrp45	Rrp45-RB	0.8833	6.84837e-05
CG43675	CG43675-RB	0.787567	6.86713e-05
CG7365	CG7365-RB	0.602533	6.93519e-05
Gfat2	Gfat2-RA	0.630133	6.9862e-05
Txl	Txl-RA	0.7958	7.09076e-05
CG18810	CG18810-RA	0.979867	7.09864e-05
CG42495	CG42495-RA	1.07947	7.09903e-05
CG15784	CG15784-RB	0.6528	7.11329e-05
CG13623	CG13623-RA	1.21883	7.11987e-05
CG17802	CG17802-RA	0.719067	7.13592e-05
CG5532	CG5532-RA	1.15593	7.16642e-05
CG5742	CG5742-RA	0.5158	7.18458e-05
CG5742	CG5742-RC	0.5158	7.18458e-05
viaf	viaf-RA	0.982133	7.19568e-05
SpdS	SpdS-RB	0.731867	7.27919e-05
SpdS	SpdS-RC	0.731867	7.27919e-05
SmG	SmG-RA	1.17283	7.30899e-05
PNUTS	PNUTS-RB	0.4509	7.31667e-05
Pink1	Pink1-RF	0.5448	7.3207e-05
CG30423	CG30423-RE	0.9646	7.3447e-05
baf	baf-RA	1.19687	7.36866e-05
fh	fh-RA	1.06447	7.38707e-05
fh	fh-RB	1.06447	7.38707e-05
Fadd	Fadd-RA	1.2914	7.43646e-05
Doc1	Doc1-RA	0.436833	7.46908e-05
CG9471	CG9471-RA	0.947733	7.47254e-05
fig	fig-RA	0.9644	7.48906e-05
MED6	MED6-RB	0.563433	7.53509e-05
CG7033	CG7033-RA	0.696367	7.57558e-05
CG8312	CG8312-RB	0.768033	7.7061e-05
wap	wap-RA	0.489067	7.73387e-05
ND-15	ND-15-RJ	1.0109	7.74866e-05
ND-15	ND-15-RK	1.0109	7.74866e-05
elgi	elgi-RA	0.674733	7.76196e-05
mRpS10	mRpS10-RA	1.02143	7.89219e-05
sip2	sip2-RA	0.665567	7.8972e-05
sip2	sip2-RB	0.665567	7.8972e-05
CG31812	CG31812-RB	0.720233	7.91639e-05
CG31674	CG31674-RA	0.692533	7.97037e-05
CG31674	CG31674-RB	0.692533	7.97037e-05
Tom7	Tom7-RA	1.24043	8.03999e-05
[truncated: 1,764 more rows]
